# Supplementary material for: Stress adaptive plasticity from Aegilops tauschii introgression lines improves drought and heat stress tolerance in bread wheat (Triticum aestivum L.)
Source: PeerJ. 2024 Jun 11;12:e17528. doi: 10.7717/peerj.17528 (PMC11177856; doi:10.7717/peerj.17528)
Supplement: Supplemental Information 1 [file peerj-12-17528-s001.xlsx]

## Sheet: Stage I (384 lines)
Code for analysis		Code_384	Block	Spike length (cm)	Spiklet number	Plant height (cm)	Tiller number (TN)	Grain yield (g)	1000 grain weight (g)
Sl.No.	Germplasm lines
1	PBW114	SAB-S1	B1	6	16	83.6667	87	240	30.4
2	PDW233	SAB-S328	B1	6.5	17.6667	72	42	-	-
3	BWL3279	SAB-S2	B1	10.8333	18	96	79	350	39
4	BWL3551	SAB-S175	B1	10.8333	21.3333	87	60	500	25.4
5	BWL4444	SAB-S16	B1	8	16.6667	84.6667	110	195	40
6	Syn1	SAB-S3	B1	12	19.3333	97.6667	92	295	32.6
7	Syn2	SAB-S44	B1	11	18.6667	114	115	465	41.6
8	Syn3	SAB-S117	B1	10.6667	16	110	35	365	45.6
9	Syn4	SAB-S143	B1	8.66667	18.3333	90	75	460	36.2
10	Syn5	SAB-S212	B1	9	18.3333	81.3333	65	270	31.6
11	Syn6	SAB-S327	B1	10.5	17.6667	99	25	-	-
12	IL-1	SAB-S4	B1	11.6667	21	89	116	-	-
13	IL-2	SAB-S5	B1	12.1667	18.6667	92	68	-	-
14	IL-3	SAB-S6	B1	10.3333	18.3333	85.3333	112	-	-
15	IL-4	SAB-S7	B1	10.5	19.6667	94	95	-	-
16	IL-5	SAB-S8	B1	12.6667	21.3333	91.6667	86	-	-
17	IL-6	SAB-S9	B1	11	18.3333	85.6667	102	-	-
18	IL-7	SAB-S10	B1	10.8333	25.6667	91.3333	92	-	-
19	IL-8	SAB-S11	B1	9	17	93.3333	121	-	-
20	IL-9	SAB-S12	B1	8.83333	19.6667	90.3333	78	-	-
21	IL-10	SAB-S13	B1	10	18.6667	87.3333	112	375	27.8
22	IL-11	SAB-S14	B1	10.5	21	91	86	270	35.4
23	IL-12	SAB-S15	B1	8.16667	14.6667	90.3333	85	-	-
24	IL-13	SAB-S17	B1	12.6667	21.6667	112.667	90	-	-
25	IL-14	SAB-S18	B1	20.6667	20.3333	106	80	350	26.6
26	IL-15	SAB-S19	B1	14	21	114	82	250	26.4
27	IL-16	SAB-S20	B1	9.83333	14.6667	92	87	-	-
28	IL-17	SAB-S21	B1	13	18	112.667	77	-	-
29	IL-18	SAB-S22	B1	13.3333	20	99.3333	68	-	-
30	IL-19	SAB-S23	B1	11	18	91.6667	91	395	26
31	IL-20	SAB-S24	B1	12	19	88	74	-	-
32	IL-21	SAB-S25	B1	14.6667	22	90	75	295	41.2
33	IL-22	SAB-S26	B1	13.8333	20.3333	94.6667	77	-	-
34	IL-23	SAB-S27	B1	12.1667	19.3333	100	97	-	-
35	IL-24	SAB-S28	B1	13.3333	19.3333	107.667	78	-	-
36	IL-25	SAB-S29	B1	12.5	22.3333	111.333	112	-	-
37	IL-26	SAB-S30	B1	11	19	102	82	-	-
38	IL-27	SAB-S32	B1	8.66667	15	86.3333	100	430	45.2
39	IL-28	SAB-S33	B2	10.3333	20.3333	100	71	-	-
40	IL-29	SAB-S34	B2	9.16667	17	86	55	340	46.2
41	IL-30	SAB-S35	B2	8.66667	19	96	70	490	37
42	IL-31	SAB-S36	B2	12.1667	21	101	77	-	-
43	IL-32	SAB-S37	B2	9	20	96.3333	82	345	30
44	IL-33	SAB-S38	B2	10.6667	20.3333	97	90	-	-
45	IL-34	SAB-S39	B2	10.1667	18.3333	86.3333	86	-	-
46	IL-35	SAB-S40	B2	10	20.6667	107.333	88	405	36.8
47	IL-36	SAB-S41	B2	12.8333	18.3333	108	94	-	-
48	IL-37	SAB-S42	B2	11.6667	19.3333	89.3333	100	-	-
49	IL-38	SAB-S43	B2	11.6667	22.3333	91.6667	120	-	-
50	IL-39	SAB-S45	B2	9.5	19.6667	97.3333	109	440	40
51	IL-40	SAB-S46	B2	9.83333	20	94	98	500	40
52	IL-41	SAB-S47	B2	8.5	20	67.3333	80	375	34.6
53	IL-42	SAB-S48	B2	9.83333	20.3333	90.6667	74	405	45.8
54	IL-43	SAB-S49	B2	9.83333	19.6667	90	95	-	-
55	IL-44	SAB-S50	B2	10.8333	20.6667	90.6667	54	460	39.2
56	IL-45	SAB-S51	B2	9.16667	17.6667	87.3333	82	300	37.6
57	IL-46	SAB-S52	B2	9.16667	17	90.6667	103	-	-
58	IL-47	SAB-S53	B2	11.3333	18	82	79	475	29.4
59	IL-48	SAB-S54	B2	9.16667	19	82	102	-	-
60	IL-49	SAB-S55	B2	10.1667	20.3333	83.3333	121	-	-
61	IL-50	SAB-S56	B2	9.33333	17.3333	94	98	600	52.8
62	IL-51	SAB-S57	B2	10.3333	19	86	89	435	42.4
63	IL-52	SAB-S58	B2	11.1667	22.3333	90	71	-	-
64	IL-53	SAB-S59	B2	10.5	19	91	75	-	-
65	IL-54	SAB-S60	B2	10	19	86.3333	45	170	40
66	IL-55	SAB-S61	B2	13.1667	21.3333	98.3333	81	-	-
67	IL-56	SAB-S62	B2	9.5	18.3333	87	115	490	40
68	IL-57	SAB-S63	B2	9.83333	17.6667	78	74	-	-
69	IL-58	SAB-S64	B2	9.66667	18.6667	88	74	-	-
70	IL-59	SAB-S65	B2	11.8333	22.3333	89.6667	86	-	-
71	IL-60	SAB-S66	B2	10.5	19.6667	87.3333	58	-	-
72	IL-61	SAB-S67	B2	10.3333	21	92	72	-	-
73	IL-62	SAB-S68	B2	11.6667	19.6667	95	79	-	-
74	IL-63	SAB-S69	B2	11.6667	20	92.3333	75	-	-
75	IL-64	SAB-S70	B2	11.8333	20	90.6667	85	-	-
76	IL-65	SAB-S71	B2	11	22.6667	89.3333	125	-	-
77	IL-66	SAB-S72	B3	10.6667	19.6667	90.6667	83	405	31.6
78	IL-67	SAB-S73	B3	10.3333	19	86.3333	85	-	-
79	IL-68	SAB-S74	B3	10.3333	21.3333	96.6667	86	495	35.4
80	IL-69	SAB-S75	B3	10	17.6667	98.6667	113	-	-
81	IL-70	SAB-S76	B3	10.5	19.6667	86	76	-	-
82	IL-71	SAB-S77	B3	15	24.6667	115.333	106	-	-
83	IL-72	SAB-S78	B3	10.3333	15.6667	91.6667	82	-	-
84	IL-73	SAB-S79	B3	12.5	19	109.667	83	-	-
85	IL-74	SAB-S80	B3	13.6667	21	104.667	72	-	-
86	IL-75	SAB-S81	B3	11.8333	18.6667	88.3333	98	-	-
87	IL-76	SAB-S82	B3	12.1667	19	108.667	87	-	-
88	IL-77	SAB-S83	B3	14.1667	23.3333	104.333	129	540	29.2
89	IL-78	SAB-S84	B3	11.6667	18.6667	106.667	96	-	-
90	IL-79	SAB-S85	B3	13.1667	22	104.333	104	420	31.8
91	IL-80	SAB-S86	B3	11.8333	18	106	115	405	32.8
92	IL-81	SAB-S87	B3	13.6667	22	110.667	77	-	-
93	IL-82	SAB-S88	B3	13.3333	21.3333	93.3333	42	-	-
94	IL-83	SAB-S89	B3	12.5	21	101	46	-	-
95	IL-84	SAB-S90	B3	12.6667	22	101.333	44	-	-
96	IL-85	SAB-S91	B3	14.5	21	107.333	50	-	-
97	IL-86	SAB-S92	B3	14.6667	22.3333	109.333	86	-	-
98	IL-87	SAB-S93	B3	11.6667	19.3333	101	97	525	36.4
99	IL-88	SAB-S94	B3	13	21.3333	103.667	70	-	-
100	IL-89	SAB-S95	B3	12.8333	21	100.667	85	-	-
101	IL-90	SAB-S96	B3	13.6667	24.3333	99	68	-	-
102	IL-91	SAB-S97	B3	12.8333	25.6667	108	88	425	30
103	IL-92	SAB-S98	B3	13.3333	20.6667	107	90	-	-
104	IL-93	SAB-S99	B3	13.2667	21.3333	111.333	96	-	-
105	IL-94	SAB-S100	B3	12.8333	18.3333	108	80	-	-
106	IL-95	SAB-S101	B3	11.5	20	105	101	470	33.6
107	IL-96	SAB-S102	B3	11.3333	19.6667	109.667	73	-	-
108	IL-97	SAB-S103	B3	13.1667	21	114.667	76	-	-
109	IL-98	SAB-S104	B3	13.5	21	106.667	91	410	32.6
110	IL-99	SAB-S105	B3	13.3333	19	111	98	-	-
111	IL-100	SAB-S106	B3	9.66667	19.6667	105	117	-	-
112	IL-101	SAB-S107	B3	10.6667	24	112	86	-	-
113	IL-102	SAB-S108	B3	11	19.3333	105	81	390	34.8
114	IL-103	SAB-S109	B3	10.3333	17.3333	92	63	390	39.4
115	IL-104	SAB-S110	B4	9.5	20.3333	99.3333	66	-	-
116	IL-105	SAB-S111	B4	10.6667	19	101.667	114	525	40
117	IL-106	SAB-S112	B4	11	24.6667	100	84	455	34.6
118	IL-107	SAB-S113	B4	11	19.6667	103	45	-	-
119	IL-108	SAB-S114	B4	11.3333	18.6667	106.333	40	-	-
120	IL-109	SAB-S115	B4	10	20	106.667	45	-	-
121	IL-110	SAB-S116	B4	9.16667	18.3333	98.3333	54	-	-
122	IL-111	SAB-S118	B4	9.5	15	76	33	-	-
123	IL-112	SAB-S119	B4	8.83333	15.6667	83.3333	40	-	-
124	IL-113	SAB-S120	B4	8	16.6667	79.3333	26	-	-
125	IL-114	SAB-S121	B4	8.5	17	73.3333	27	-	-
126	IL-115	SAB-S122	B4	9.33333	18	77.3333	80	350	44.4
127	IL-116	SAB-S123	B4	9	17	75.3333	38	-	-
128	IL-117	SAB-S124	B4	8.66667	18	82	34	-	-
129	IL-118	SAB-S125	B4	9.66667	19.3333	91.3333	56	-	-
130	IL-119	SAB-S126	B4	9.5	19.6667	90.6667	78	490	43.4
131	IL-120	SAB-S127	B4	9.5	19	90.3333	52	435	40
132	IL-121	SAB-S128	B4	10.1667	20	100	55	-	-
133	IL-122	SAB-S129	B4	9.5	19.6667	98.3333	50	-	-
134	IL-123	SAB-S130	B4	9.5	18	92.6667	35	530	38.4
135	IL-124	SAB-S131	B4	10.3333	18	81.6667	50	-	-
136	IL-125	SAB-S132	B4	9.5	19.3333	88.6667	40	-	-
137	IL-126	SAB-S133	B4	10	19.3333	113	56	-	-
138	IL-127	SAB-S134	B4	13.1667	20.6667	109.667	50	-	-
139	IL-128	SAB-S135	B4	6.83333	15.3333	88.3333	55	-	-
140	IL-129	SAB-S136	B4	9.66667	20.6667	110	43	-	-
141	IL-130	SAB-S137	B4	7.83333	18	102	30	520	38.8
142	IL-131	SAB-S138	B4	8.83333	18.6667	105.333	30	575	38.4
143	IL-132	SAB-S139	B4	9.5	18.6667	101.333	55	-	-
144	IL-133	SAB-S140	B4	7.66667	17.3333	96	55	-	-
145	IL-134	SAB-S141	B4	9.33333	19.3333	96.6667	55	675	48.8
146	IL-135	SAB-S144	B4	11.6667	20.3333	99	42	450	38.4
147	IL-136	SAB-S145	B4	10	20.3333	87	95	490	42.8
148	IL-137	SAB-S146	B4	9.66667	18.6667	102.333	50	-	-
149	IL-138	SAB-S147	B4	9.66667	17.6667	79.6667	40	-	-
150	IL-139	SAB-S148	B4	10.1667	22.6667	71.3333	21	-	-
151	IL-140	SAB-S149	B4	9.33333	16.3333	80	25	-	-
152	IL-141	SAB-S150	B4	11	19.3333	80.6667	23	-	-
153	IL-142	SAB-S151	B5	11	16	81	26	-	-
154	IL-143	SAB-S152	B5	10.5	17.3333	89	30	-	-
155	IL-144	SAB-S153	B5	9.83333	17.3333	82.3333	50	-	-
156	IL-145	SAB-S154	B5	9.83333	19	88.6667	45	-	-
157	IL-146	SAB-S155	B5	7.33333	17	96	70	-	-
158	IL-147	SAB-S156	B5	8.83333	16.6667	93.6667	35	-	-
159	IL-148	SAB-S157	B5	8	17.3333	98.3333	37	-	-
160	IL-149	SAB-S158	B5	9.33333	18	100.667	63	-	-
161	IL-150	SAB-S159	B5	10.8333	21.6667	99.3333	53	-	-
162	IL-151	SAB-S160	B5	9.66667	18.3333	96	50	-	-
163	IL-152	SAB-S161	B5	10.6667	22	99.3333	41	-	-
164	IL-153	SAB-S162	B5	10.5	20	97.6667	62	-	-
165	IL-154	SAB-S163	B5	11.3333	20.6667	104.667	45	-	-
166	IL-155	SAB-S164	B5	12.3333	21	106.333	53	-	-
167	IL-156	SAB-S165	B5	11	20	88.3333	55	-	-
168	IL-157	SAB-S166	B5	13.3333	19.3333	107.667	52	-	-
169	IL-158	SAB-S167	B5	13.5	20.3333	108	42	-	-
170	IL-159	SAB-S168	B5	12.3333	23.3333	100.667	62	300	30.6
171	IL-160	SAB-S169	B5	13.6667	20	103.333	37	-	-
172	IL-161	SAB-S170	B5	11.5	17.3333	97.6667	46	-	-
173	IL-162	SAB-S171	B5	10.8333	17.6667	100.333	98	-	-
174	IL-163	SAB-S172	B5	11	19.6667	93	69	-	-
175	IL-164	SAB-S173	B5	11.3333	18.6667	92.6667	30	-	-
176	IL-165	SAB-S174	B5	12.1667	20.3333	93.3333	33	-	-
177	IL-166	SAB-S176	B5	12	19	99	50	-	-
178	IL-167	SAB-S177	B5	8.16667	16.3333	95.6667	45	-	-
179	IL-168	SAB-S178	B5	10.5	19.6667	91	65	-	-
180	IL-169	SAB-S179	B5	9.33333	18.6667	83	48	-	-
181	IL-170	SAB-S180	B5	10.6667	19	87.6667	43	-	-
182	IL-171	SAB-S181	B5	9.66667	17.6667	88.3333	63	-	-
183	IL-172	SAB-S182	B5	12.1667	21.6667	105	50	-	-
184	IL-173	SAB-S183	B5	11.6667	21.6667	106	56	-	-
185	IL-174	SAB-S184	B5	14.5	25	101.667	45	-	-
186	IL-175	SAB-S185	B5	11	21	92	47	-	-
187	IL-176	SAB-S186	B5	12.1667	20.6667	96.3333	46	-	-
188	IL-177	SAB-S187	B5	11	18.6667	93.6667	60	-	-
189	IL-178	SAB-S188	B5	10.1667	17	101.333	65	-	-
190	IL-179	SAB-S189	B5	10.5	19.6667	98	42	-	-
191	IL-180	SAB-S190	B6	10.3333	18.3333	89.6667	40	435	39.2
192	IL-181	SAB-S191	B6	10.1667	19.3333	94.3333	21	-	-
193	IL-182	SAB-S192	B6	10.8333	19	93.6667	32	-	-
194	IL-183	SAB-S193	B6	10.8333	20	99	43	-	-
195	IL-184	SAB-S194	B6	12.5	20	95	40	445	33.6
196	IL-185	SAB-S195	B6	11.1667	19	80.6667	60	515	37
197	IL-186	SAB-S196	B6	9.33333	20	90	55	525	34.6
198	IL-187	SAB-S197	B6	11.6667	21	106	41	-	-
199	IL-188	SAB-S198	B6	9.83333	17.6667	84.3333	32	-	-
200	IL-189	SAB-S199	B6	13	22.6667	110.333	40	-	-
201	IL-190	SAB-S200	B6	10.8333	19.3333	94	45	-	-
202	IL-191	SAB-S201	B6	10.6667	19	78	45	-	-
203	IL-192	SAB-S202	B6	12.3333	18	83.6667	23	-	-
204	IL-193	SAB-S203	B6	11.8333	19.6667	84	36	-	-
205	IL-194	SAB-S204	B6	10.8333	19.3333	82	23	-	-
206	IL-195	SAB-S205	B6	12.5	21	87.6667	40	-	-
207	IL-196	SAB-S206	B6	9.5	18.6667	82.6667	50	-	-
208	IL-197	SAB-S207	B6	10.1667	16	77.3333	37	-	-
209	IL-198	SAB-S208	B6	8.5	15.6667	83.6667	41	-	-
210	IL-199	SAB-S209	B6	9.5	17.3333	80	42	-	-
211	IL-200	SAB-S210	B6	10.5	16.3333	89.3333	12	-	-
212	IL-201	SAB-S211	B6	8.66667	15.3333	85.6667	45	-	-
213	IL-202	SAB-S213	B6	14.5	20.6667	97.3333	105	-	-
214	IL-203	SAB-S214	B6	14.8333	23.3333	99	66	-	-
215	IL-204	SAB-S215	B6	14.5	21	99.3333	55	-	-
216	IL-205	SAB-S216	B6	13	21	85.6667	38	-	-
217	IL-206	SAB-S217	B6	14	21.3333	103	22	-	-
218	IL-207	SAB-S218	B6	13.8333	21	104	60	-	-
219	IL-208	SAB-S219	B6	12.8333	21	103.667	80	-	-
220	IL-209	SAB-S220	B6	13.3333	23.6667	101	72	-	-
221	IL-210	SAB-S221	B6	15	24	100.667	45	-	-
222	IL-211	SAB-S222	B6	11.1667	20	95	55	-	-
223	IL-212	SAB-S223	B6	12.1667	23	97.6667	40	400	32.6
224	IL-213	SAB-S224	B6	12.5	22.6667	100.333	52	-	-
225	IL-214	SAB-S225	B6	13.1667	21	101.333	55	-	-
226	IL-215	SAB-S226	B6	12.5	22.6667	108.333	62	-	-
227	IL-216	SAB-S227	B6	12.1667	23.6667	112	62	-	-
228	IL-217	SAB-S228	B6	12.6667	21	93	70	-	-
229	IL-218	SAB-S229	B7	11.5	19.3333	93.3333	65	-	-
230	IL-219	SAB-S230	B7	12.3333	22.3333	105.333	55	-	-
231	IL-220	SAB-S231	B7	10.6667	19.6667	103.667	70	-	-
232	IL-221	SAB-S232	B7	13	18.3333	107.333	47	-	-
233	IL-222	SAB-S233	B7	11.3333	18.6667	107	52	-	-
234	IL-223	SAB-S234	B7	14	23.3333	103	42	-	-
235	IL-224	SAB-S235	B7	12.8333	21.3333	100.667	64	-	-
236	IL-225	SAB-S236	B7	12.6667	21.6667	98	47	-	-
237	IL-226	SAB-S237	B7	13	20.3333	104	114	325	25.4
238	IL-227	SAB-S238	B7	13.3333	21.6667	102.333	102	335	24.4
239	IL-228	SAB-S239	B7	14.5	20	95.6667	45	-	-
240	IL-229	SAB-S240	B7	14.1667	22.3333	88.3333	85	-	-
241	IL-230	SAB-S241	B7	14	22.3333	101.333	38	-	-
242	IL-231	SAB-S242	B7	14.1667	19.3333	97.3333	107	-	-
243	IL-232	SAB-S243	B7	11.6667	19.6667	98	86	-	-
244	IL-233	SAB-S244	B7	11.3333	19	101	45	-	-
245	IL-234	SAB-S245	B7	14.3333	23	103.667	58	-	-
246	IL-235	SAB-S246	B7	13.5	20.3333	100.667	72	-	-
247	IL-236	SAB-S247	B7	14	21.3333	100.667	56	-	-
248	IL-237	SAB-S248	B7	10.1667	19	91.3333	60	-	-
249	IL-238	SAB-S249	B7	10.3333	19	95	72	-	-
250	IL-239	SAB-S250	B7	10	18	85	72	-	-
251	IL-240	SAB-S251	B7	12.6667	22.6667	101	50	-	-
252	IL-241	SAB-S252	B7	9.33333	19	81	108	-	-
253	IL-242	SAB-S253	B7	11.3333	18.6667	85.3333	48	-	-
254	IL-243	SAB-S254	B7	11.6667	19	85	52	-	-
255	IL-244	SAB-S255	B7	11	19.3333	79	62	-	-
256	IL-245	SAB-S256	B7	8.5	16	91.3333	72	-	-
257	IL-246	SAB-S257	B7	9.66667	18	88	72	-	-
258	IL-247	SAB-S258	B7	10.3333	16	78.3333	23	-	-
259	IL-248	SAB-S259	B7	9.16667	19.3333	87.3333	42	345	25.6
260	IL-249	SAB-S260	B7	11.6667	19.6667	99	72	-	-
261	IL-250	SAB-S261	B7	12.6667	20.6667	97.3333	51	-	-
262	IL-251	SAB-S262	B7	9.5	17.6667	89.6667	75	-	-
263	IL-252	SAB-S263	B7	10.3333	19	86	95	-	-
264	IL-253	SAB-S264	B7	9.83333	17.6667	83	65	-	-
265	IL-254	SAB-S265	B7	9.66667	19	81	56	-	-
266	IL-255	SAB-S266	B7	9.33333	16.3333	80.6667	57	-	-
267	IL-256	SAB-S267	B8	10.1667	17.3333	86.3333	72	-	-
268	IL-257	SAB-S268	B8	9	17.3333	92.3333	57	-	-
269	IL-258	SAB-S269	B8	10	18.6667	91.6667	45	-	-
270	IL-259	SAB-S270	B8	11.8333	19.6667	95	35	235	27.6
271	IL-260	SAB-S271	B8	11.3333	17.6667	78	55	-	-
272	IL-261	SAB-S272	B8	10.6667	18.3333	87.3333	91	-	-
273	IL-262	SAB-S273	B8	11.6667	19.3333	104	58	-	-
274	IL-263	SAB-S274	B8	9	15.6667	94.6667	45	-	-
275	IL-264	SAB-S275	B8	8.5	15	92.3333	52	-	-
276	IL-265	SAB-S276	B8	8.5	15	92.3333	52	-	-
277	IL-266	SAB-S277	B8	11	19	99	32	-	-
278	IL-267	SAB-S278	B8	9.16667	16	99.3333	72	-	-
279	IL-268	SAB-S279	B8	9.16667	20	102.667	112	-	-
280	IL-269	SAB-S280	B8	8.33333	17	95	45	-	-
281	IL-270	SAB-S281	B8	11.5	20	113	92	-	-
282	IL-271	SAB-S282	B8	10.5	19	101.667	82	-	-
283	IL-272	SAB-S283	B8	11.6667	20	106	45	-	-
284	IL-273	SAB-S284	B8	11.1667	19	103.333	32	-	-
285	IL-274	SAB-S285	B8	15.1667	23.3333	107	58	-	-
286	IL-275	SAB-S286	B8	12.5	18	98	82	-	-
287	IL-276	SAB-S287	B8	11.6667	21.6667	102.667	82	-	-
288	IL-277	SAB-S288	B8	10.3333	18.3333	98.6667	142	-	-
289	IL-278	SAB-S289	B8	10.6667	17.6667	99.6667	162	-	-
290	IL-279	SAB-S290	B8	13.5	19	103.667	72	150	26
291	IL-280	SAB-S291	B8	12.8333	19	105	75	-	-
292	IL-281	SAB-S292	B8	8.66667	17	98.6667	118	-	-
293	IL-282	SAB-S293	B8	8.83333	16.3333	99.3333	115	-	-
294	IL-283	SAB-S294	B8	14.5	20.6667	92	122	-	-
295	IL-284	SAB-S295	B8	11.8333	20	96	121	-	-
296	IL-285	SAB-S296	B8	11.5	16	100.333	80	-	-
297	IL-286	SAB-S297	B8	10.1667	18.3333	93.3333	58	-	-
298	IL-287	SAB-S298	B8	10.6667	19.3333	90.3333	40	-	-
299	IL-288	SAB-S299	B8	11.5	19	97.6667	52	-	-
300	IL-289	SAB-S300	B8	12.3333	19	101	55	-	-
301	IL-290	SAB-S301	B8	11.8333	17.3333	105.667	52	-	-
302	IL-291	SAB-S302	B8	9.66667	18.3333	96.6667	58	-	-
303	IL-292	SAB-S303	B8	12.8333	21	100	32	-	-
304	IL-293	SAB-S304	B8	10.6667	17.6667	105.333	62	-	-
305	IL-294	SAB-S305	B9	9.33333	16.3333	96.3333	55	-	-
306	IL-295	SAB-S306	B9	12.6667	20.3333	101.667	60	-	-
307	IL-296	SAB-S307	B9	10.8333	20.3333	94	45	-	-
308	IL-297	SAB-S308	B9	11.1667	18.3333	97.3333	92	-	-
309	IL-298	SAB-S309	B9	13	20.3333	92.3333	104	-	-
310	IL-299	SAB-S310	B9	9.5	15.6667	93.6667	82	-	-
311	IL-300	SAB-S311	B9	10.5	19.6667	93.3333	108	-	-
312	IL-301	SAB-S312	B9	9.5	17	97.6667	82	-	-
313	IL-302	SAB-S313	B9	12.3333	19.6667	103.667	52	-	-
314	IL-303	SAB-S314	B9	9	16.3333	101	48	470	38.2
315	IL-304	SAB-S315	B9	10	17.3333	89.3333	102	-	-
316	IL-305	SAB-S316	B9	9.33333	16.6667	90.6667	62	-	-
317	IL-306	SAB-S317	B9	11.5	17.6667	106	34	-	-
318	IL-307	SAB-S318	B9	9.66667	17.3333	103	62	-	-
319	IL-308	SAB-S319	B9	10.5	18.3333	95	59	350	33.6
320	IL-309	SAB-S320	B9	8.66667	17	83	49	-	-
321	IL-310	SAB-S321	B9	10	15.3333	99	46	-	-
322	IL-311	SAB-S322	B9	8	14.6667	86.3333	62	-	-
323	IL-312	SAB-S323	B9	7.83333	14.6667	91.3333	85	-	-
324	IL-313	SAB-S324	B9	9.66667	17.3333	90	40	-	-
325	IL-314	SAB-S325	B9	10.3333	16.6667	90.6667	28	-	-
326	IL-315	SAB-S326	B9	7.83333	14.3333	88.3333	35	-	-
327	IL-316	SAB-S329	B9	12	21	97	32	-	-
328	IL-317	SAB-S330	B9	11.1667	20	93.3333	34	-	-
329	IL-318	SAB-S331	B9	9.16667	21.6667	89.3333	32	-	-
330	IL-319	SAB-S332	B9	9.66667	18.3333	79.6667	75	-	-
331	IL-320	SAB-S333	B9	13.1667	23	95	38	-	-
332	IL-321	SAB-S334	B9	9.33333	19	95.6667	58	-	-
333	IL-322	SAB-S335	B9	9.33333	18	96	42	-	-
334	IL-323	SAB-S336	B9	11.5	19.6667	95.3333	55	-	-
335	IL-324	SAB-S337	B9	8.83333	18.3333	85	47	-	-
336	IL-325	SAB-S338	B9	8.66667	19	78	36	-	-
337	IL-326	SAB-S339	B9	13.5	23.3333	99.3333	82	-	-
338	IL-327	SAB-S340	B9	12.6667	21.6667	102.333	52	-	-
339	IL-328	SAB-S341	B9	9.83333	17.6667	97	84	-	-
340	IL-329	SAB-S342	B9	8.33333	17.3333	88.6667	45	-	-
341	IL-330	SAB-S343	B9	11.8333	21	92.6667	45	-	-
342	IL-331	SAB-S344	B9	9.83333	21.6667	86.6667	48	-	-
343	IL-332	SAB-S345	B10	10.1667	20.3333	96	42	-	-
344	IL-333	SAB-S346	B10	10.6667	19.6667	103	62	-	-
345	IL-334	SAB-S347	B10	12.3333	23	101.333	118	-	-
346	IL-335	SAB-S348	B10	11.5	18.3333	98.3333	55	-	-
347	IL-336	SAB-S349	B10	12.3333	20.3333	96	105	-	-
348	IL-337	SAB-S350	B10	12.3333	19.6667	99.3333	62	-	-
349	IL-338	SAB-S351	B10	15.1667	23	92.3333	115	-	-
350	IL-339	SAB-S352	B10	13.5	21	90.3333	58	-	-
351	IL-340	SAB-S353	B10	10.1667	19.6667	82	63	-	-
352	IL-341	SAB-S354	B10	13.1667	22	92	53	-	-
353	IL-342	SAB-S355	B10	11.1667	20	96.6667	60	-	-
354	IL-343	SAB-S356	B10	11.5	17.3333	93.3333	122	-	-
355	IL-344	SAB-S357	B10	13	21.6667	96.3333	58	-	-
356	IL-345	SAB-S358	B10	10.3333	17.6667	99	42	-	-
357	IL-346	SAB-S359	B10	13.1667	20.3333	102.333	48	-	-
358	IL-347	SAB-S360	B10	10	18	97	62	-	-
359	IL-348	SAB-S361	B10	9.66667	15.3333	96	47	-	-
360	IL-349	SAB-S362	B10	11.8333	18	99.3333	22	-	-
361	IL-350	SAB-S363	B10	12.6667	19.3333	94.3333	60	-	-
362	IL-351	SAB-S364	B10	10	16	99.3333	102	-	-
363	IL-352	SAB-S365	B10	10	17	98.6667	70	-	-
364	IL-353	SAB-S366	B10	12	18.6667	108	80	-	-
365	IL-354	SAB-S367	B10	11.8333	19.3333	104	40	-	-
366	IL-355	SAB-S368	B10	9.83333	17.3333	91.6667	115	230	36
367	IL-356	SAB-S369	B10	12.1667	21	103	62	-	-
368	IL-357	SAB-S370	B10	9.33333	15	81.3333	114	-	-
369	IL-358	SAB-S371	B10	10.3333	18	91	55	-	-
370	IL-359	SAB-S372	B10	12.6667	20.6667	102	108	-	-
371	IL-360	SAB-S373	B10	11.1667	20.3333	97.3333	52	-	-
372	IL-361	SAB-S374	B10	10.5	15.3333	96.6667	116	-	-
373	IL-362	SAB-S375	B10	12.6667	20	93	45	-	-
374	IL-363	SAB-S376	B10	11	16	104	108	-	-
375	IL-364	SAB-S377	B10	10.3333	18.3333	94.3333	58	370	40
376	IL-365	SAB-S378	B10	14.1667	20.6667	108	115	-	-
377	IL-366	SAB-S379	B10	11.1667	19	88.6667	53	-	-
378	IL-367	SAB-S380	B10	10	15.6667	85.6667	78	-	-
379	IL-368	SAB-S381	B10	12.1667	18.6667	97.3333	72	-	-
380	IL-369	SAB-S382	B10	10	15.3333	83.3333	40	-	-
B1	PBW-725	C1	B1	20.6667	12.1111	94.8889	65	622.5	45.8
B2	PBW-725	C1	B2	19	12.6667	98	55	590	44.5
B3	PBW-725	C1	B3	19.6667	13.8333	98	58	630	43.1
B4	PBW-725	C1	B4	18.3333	12.4333	95.3333	72	598	40.6
B5	PBW-725	C1	B5	18.3333	13.4333	96	62	645	40.3
B6	PBW-725	C1	B6	19.3333	12.8667	97.6667	71	618	43.5
B7	PBW-725	C1	B7	18.3333	13.3333	96.3333	74	625	44.8
B8	PBW-725	C1	B8	19	12.8333	97	75	590	46
B9	PBW-725	C1	B9	18.6667	12.1667	97.3333	80	640	43.9
B10	PBW-725	C1	B10	18.6667	12.9333	98	67	635	42.7
B1	HD-3086	C2	B1	18.6667	10.1667	94.2222	111	527.5	41.6
B2	HD-3086	C2	B2	19	10.8333	97.6667	101	505	39
B3	HD-3086	C2	B3	19.3333	10	98	89	495	38.5
B4	HD-3086	C2	B4	18	10.8333	97	75	538	36.4
B5	HD-3086	C2	B5	16.6667	10.6667	98.6667	76	518	37.5
B6	HD-3086	C2	B6	18.6667	10.1667	97.6667	95	545	39.4
B7	HD-3086	C2	B7	19	10.1667	94.3333	98	539	35.8
B8	HD-3086	C2	B8	20.3333	9.76667	96	87	510	41.4
B9	HD-3086	C2	B9	20	11	100	78	552	38.3
B10	HD-3086	C2	B10	18.3333	11.5	97.6667	92	543	40.8

## Sheet: Stage II (rep1)
Treatment	T1						T2						T3						T4						T5						T6
	25°C+0%						25°C+20%						30°C+0%						30°C+20%						35°C+0%						35°C+20%
	Germination percentage (GP; %)	Shoot length (SL; cm)	Root length (RL; cm)	Coleoptile length (CL; cm)	Shoot fresh weight (SFW; g)	Root fresh weight (RFW; g)	Germination percentage (GP; %)	Shoot length (SL; cm)	Root length (RL; cm)	Coleoptile length (CL; cm)	Shoot fresh weight (SFW; g)	Root fresh weight (RFW; g)	Germination percentage (GP; %)	Shoot length (SL; cm)	Root length (RL; cm)	Coleoptile length (CL; cm)	Shoot fresh weight (SFW; g)	Root fresh weight (RFW; g)	Germination percentage (GP; %)	Shoot length (SL; cm)	Root length (RL; cm)	Coleoptile length (CL; cm)	Shoot fresh weight (SFW; g)	Root fresh weight (RFW; g)	Germination percentage (GP; %)	Shoot length (SL; cm)	Root length (RL; cm)	Coleoptile length (CL; cm)	Shoot fresh weight (SFW; g)	Root fresh weight (RFW; g)	Germination percentage (GP; %)	Shoot length (SL; cm)	Root length (RL; cm)	Coleoptile length (CL; cm)	Shoot fresh weight (SFW; g)	Root fresh weight (RFW; g)
Syn1	90	14.1111	25.0556	3.52222	0.0971429	0.0871429	80	4.43333	19.9222	3.18889	0.0366667	0.0277778	80	18.6625	18.7	3.8625	0.12	0.0725	80	16.9875	21.33	4.3	0.07125	0.02875	80	14.3875	13.0375	3.7125	0.08375	0.03125	10	2.6	3.75	2	0	0
IL-10	100	13.2222	20.8667	3.51111	0.088	0.072	70	1.81429	13.0714	1.14286	0.005	0.0175	80	15.9286	16.2857	2.92857	0.101667	0.06	40	8.8	15.5	2.94	0.0375	0.0225	40	15.6667	7.83333	3.33333	0.103333	0.0166667	20	1.5	2.5	1.25	0	0
IL-11	90	16.4444	23.3889	3.72222	0.101667	0.095	70	9.125	20.25	3.75	0.048	0.028	70	20	22.875	3.55	0.134	0.072	80	15.25	24.5	3.76667	0.0733333	0.0233333	60	15.0833	8.33333	3.3	0.103333	0.03	0	0	0	0	0	0
IL-14	100	16.67	24.5	3.49	0.1125	0.08125	60	1.5	21.1667	1.41667	0	0.0075	90	20.3111	18.5556	3.38889	0.107143	0.0471429	20	0	6.5	0	0	0	90	14.9556	13.7556	2.66667	0.101111	0.0388889	0	0	0	0	0	0
IL-15	90	16.69	23.6	3.35	0.117143	0.0828571	80	1.5375	18.0875	1.4125	0.01	0.0183333	90	19.9375	16.425	3.5	0.108	0.042	40	1.08333	12.3333	1	0.00925	0.00333333	40	14.24	12.88	2.64	0.096	0.028	20	1.2	3.5	0	0	0
IL-19	100	17.4889	25.1667	3.54444	0.12	0.098	90	2.64286	16.1429	1.64286	0.00571429	0.00285714	70	18.3	17.9571	3.22857	0.106667	0.0433333	60	2.61667	13.5	1.65	0.01	0.005	80	13.4429	13.6429	2.54286	0.106667	0.0366667	10	2.1	4	2.1	0	0
IL-21	90	16.06	27.53	3.48	0.125	0.125	90	4.625	18.5	2.475	0.0216667	0.0216667	90	20.675	19.125	3.7875	0.126667	0.0566667	40	1.9	10	1.1	0	0	60	18.5167	15	3.25	0.112	0.042	30	3.65	5.25	1.9	0.02	0.018
IL-27	100	16.36	25.93	3.48	0.102	0.104	90	2.0625	13	0.8375	0.012	0.018	90	16.15	20.35	3.27	0.101667	0.075	60	1.83333	6.75	0.916667	0	0	80	7.625	9.9375	3.3125	0.042	0.026	0	0	0	0	0	0
IL-29	90	20.5875	22.25	3.7375	0.175	0.095	90	5.88889	15.7778	3	0.046	0.034	80	18.8556	15.5556	3.95556	0.118571	0.0528571	60	4.075	15.25	2.8125	0.025	0.02	70	17	10.6875	3.8125	0.106667	0.04	10	6.35	6	2.85	0.043	0.025
IL-30	80	15.27	22.85	3.44	0.101111	0.0677778	80	3.25	15.2875	1.5	0.008	0.01	90	23	22.5	3.95556	0.11625	0.05625	40	8.46	20	4.16	0.04	0.02	80	12.6111	9	3.36667	0.0766667	0.015	20	0	3.5	0	0	0
IL-32	100	17.1222	29.2778	3.88889	0.138333	0.108333	90	5.72222	18.1111	3.11111	0.035	0.02	100	16.7222	17.9444	3.4	0.0866667	0.045	50	3.83333	14	2.16667	0.015	0.01	80	12.2571	11.7143	3.04286	0.09	0.015	10	0	3.6	0	0	0
IL-35	100	13.6	22.94	3.48	0.0955556	0.107778	100	6.61111	15.5333	2.96667	0.0257143	0.0371429	70	16.1625	15.75	3.75	0.094	0.062	70	2.35714	14.2143	1.91429	0.02	0.0175	80	16.1625	14.6875	3.35	0.1	0.03	70	3.9	6.52857	2.12857	0.0171429	0.028
Syn2	90	15.42	19.82	3.65	0.09375	0.090375	70	1.5	12.6875	1.4	0.00833333	0.0183333	100	17.85	17.63	3.73	0.105	0.053	50	0.75	7.16667	0.75	0	0	60	1.58333	4.25	0.833333	0.0216667	0.0516667	10	0	7	0	0	0
IL-39	80	10.9375	18.375	3.2875	0.09	0.09	50	0.966667	10.3333	0.966667	0	0	90	13.525	10.8125	3.2625	0.0766667	0.0333333	70	1.57143	6.28571	1.07143	0	0	70	7.84286	7.5	2.5	0.002	0	20	0	5.25	0	0	0
IL-40	100	13.3143	20.4714	3.28571	0.0914286	0.0714286	80	3.68571	12.4857	2.75714	0.0242857	0.0228571	90	15.3875	16.875	3.775	0.0975	0.0575	60	1.83333	10.4167	1.16667	0.000333333	0.0005	60	2.6375	2.5625	1.8875	0.045	0.02375	10	0	1.5	0	0	0
IL-41	90	15	24.95	3.325	0.1025	0.10375	80	3.2	14.0429	2.62857	0.0271429	0.0185714	90	16.65	17.7875	3.725	0.11625	0.06625	60	2	7.5	1	0.01	0.0133333	80	0.9	3.1	0.8	0.004	0	0	0	0	0	0	0
IL-42	100	15.6333	18.3222	3.35556	0.125	0.075	100	12.5	20.3	3.89	0.0533333	0.0533333	90	18.02	18.84	3.58	0.226667	0.123333	50	1.7	16.9286	1.17143	0	0.01	70	5.11111	2.56667	2.38889	0.08	0.01	20	0	2.66667	0	0	0
IL-44	100	10.6222	18.3778	3.17778	0.082	0.076	90	11.6375	18	3.5125	0.06	0.05	80	16.5875	16.4125	3.325	0.125	0.035	100	6.2777	19.444	2.45556	0.036	0.016	90	15.25	10.5625	3.2875	0.0975	0.0375	70	10.5143	7.42857	3.35714	0.0555	0.04
IL-45	80	15.58	24.9	3.27	0.118	0.128	80	3.9	13.6875	2.2625	0.025	0.025	80	18.3556	20.2778	3.92222	0.144	0.082	60	1.83333	12.25	1.41667	0	0.02	80	14.5625	11.875	2.875	0.113333	0.0366667	20	13	9.5	3.3	0.0589	0.01925
IL-47	100	17.5333	19.3889	3.54444	0.11	0.06	100	4.17	14.47	2.58	0.025	0.02	90	16.8	16.55	3.76	0.092	0.06	90	1.775	10.3125	1.2125	0	0.01	90	13.8111	12	3.7	0.0933333	0.0333333	30	2.66667	5.16667	1.16667	0.028	0.0083
IL-50	90	13.7857	22.2286	3.27143	0.101429	0.112857	90	4.44	15.3	2.76	0.042	0.04	80	17.3429	18.1143	3.6	0.131429	0.0642857	80	3.1	18.6667	2.16667	0.02	0.03	80	16.06	11.8	3.3	0.124	0.024	60	5.32	6.5	1.9	0.04	0.019
IL-51	80	9.9375	15.375	2.125	0.08	0.08	60	2.1	9.84	1.4	0	0	70	13.4125	12.375	3.4375	0.0825	0.03	50	0.7	7.84	0.7	0	0	60	4.35	0.75	2.1	0	0	30	0	2	0	0	0
IL-54	100	11.9444	22.7222	2.67778	0.09	0.074	80	10.5	7.92857	0.2	0	0.0075	100	15.2222	14.4111	3.21111	0.0766667	0.0266667	70	10.5	5.4	0.2	0	0	80	14.55	13.0625	2.975	0.084	0.026	40	11.34	12	3.2	0.06	0.03
IL-56	100	7.51111	12.3889	2.16667	0.0433333	0.0183333	0	0	0	0	0	0	60	20.5	19.7143	3.71429	0.123333	0.0133333	10	0	1.5	0	0	0	70	12.5	8.95714	2.85714	0.085	0.015	0	0	0	0	0	0
IL-66	80	11.9778	16.3111	3.01111	0.076	0.084	70	0.516667	6.03333	0.3	0	0.0029	80	15.825	16.4625	3.1875	0.0866667	0.0333333	0	0	0	0	0	0	80	7.3	4.61111	2.25556	0.052	0.014	0	0	0	0	0	0
IL-68	100	10.5	15.375	2.9375	0.05	0.075	30	0	4.83333	0	0	0	80	12.75	17.125	2.525	0.0975	0.0525	20	0	3.25	0	0	0	80	13.25	11.5125	3.25375	0.08	0.03	20	2.25	2.25	4	0.045	0.02
IL-77	100	15.58	22.27	2.99	0.111667	0.085	20	0	0.6	0	0	0	90	18	16	3.32222	0.13	0.04	0	0	0	0	0	0	90	12.4	11.25	2.63	0.0671429	0.0228571	0	0	0	0	0	0
IL-79	90	14.77	20.92	3.45	0.096	0.1	10	0	9.15	0	0	0.005	90	14.5	12.6	2.78	0.088	0.034	0	0	0	0	0	0	20	5.25	1.75	2.25	0.01	0	0	0	0	0	0	0
IL-80	100	11.9556	20.6778	2.5	0.095	0.0775	80	0	5.3125	0	0	0	80	16.0556	14.8333	3.07778	0.098	0.032	0	0	0	0	0	0	80	4.1875	3.6875	1.9	0.0575	0.0075	0	0	0	0	0	0
IL-87	100	15.6	21.69	2.89	0.122	0.114	40	0	7.125	0	0	0.005	90	20.0556	17.5	4.08889	0.125	0.045	20	0	5.75	0	0	0	100	11.21	8.25	2.37	0.0683333	0.01	20	1.25	5	1	0.005	0.015
IL-91	100	12.4	20.44	3.29	0.0928571	0.0642857	80	1.375	10.5	1.125	0	0.0075	80	22.0111	18.7778	3.73333	0.121667	0.0383333	60	1.85	3.83333	1.5	0.0666667	0	40	2.625	2.25	1.2	0.005	0	0	0	0	0	0	0
IL-95	100	20.55	30	3.85	0.124	0.124	90	3.68889	13.6667	3.32222	0.035	0.0275	90	19.82	18.9	3.83	0.112	0.068	10	0	4.25	0	0	0	80	15.8556	11.9444	3.15556	0.098	0.046	0	0	0	0	0	0
IL-98	100	20.4	31.75	3.97	0.145	0.128333	100	0.7	9.6	0.45	0.00571429	0.00857143	70	15.2	13.25	4.1125	0.1	0.01	10	0	1	0	0	0	80	17.9	13.7778	2.96667	0.112857	0.04	0	0	0	0	0	0
IL-102	100	14.8556	24.3222	3.18889	0.116	0.078	50	7.93333	17.3667	4.43333	0.055	0.05	60	20.8143	21	3.57143	0.14	0.08	60	0.25	3.75	0.25	0	0	70	5.47143	5.08571	2.92857	0.06	0.0366667	10	0	3.25	0	0	0
IL-103	70	14.22	24.85	3.71	0.112	0.087	50	10.0167	18.7	4.45	0.0666667	0.04	70	19.625	20.5625	3.8	0.1375	0.07375	40	0.733333	7.16667	0.733333	0.00666667	0.00333333	50	11.5	2.7	0.45	0.09	0.03	0	0	0	0	0	0
IL-105	100	12.45	16.9375	3.7375	0.075	0.055	80	1.4125	9.25	1.0375	0.00393333	0.005	80	15.3571	13.1429	3.41429	0.09	0.05	30	0	3.4	0	0	0	60	12.2571	9.42857	3.5	0.12	0.05	20	0	23.5	0	0	0
IL-106	80	15.6875	24.6875	3.9	0.0925	0.1	60	2.95714	12.1571	2.45714	0.02	0.0266667	80	17.0714	17.7286	3.55714	0.116667	0.06	60	0.25	5.91667	0.25	0	0	90	13.3889	12.2778	2.87778	0.07	0.032	30	0.566667	5.33333	0.566667	0.033	0.06
Syn3	90	17.8444	30.6667	3.26667	0.156	0.132	70	7.625	16.775	2.575	0.0375	0.03	80	17.72	17.2	3.32	0.14625	0.08125	70	3.2625	10.5	1.35	0.0175	0.01	100	13.05	10.6	3.06	0.1025	0.0525	20	1.66667	5	0.6	0.02	0.026
IL-115	100	15.9111	20.0111	3.8	0.1	0.02	100	8.16	15.48	3.48	0.0466667	0.02	90	13.1222	12.8667	3.04444	0.1	0.06	50	1.83333	6.83333	1.35	0	0.00333333	70	4.3	1.58571	1.91429	0	0	40	1.03333	4.83333	1.03333	0.015	0
IL-119	100	16.55	26.75	2.9	0.0866667	0.08	50	2.8	10.9	1.6	0.0108	0.002	70	18.2125	16.8125	3.475	0.156667	0.0933333	40	1.575	10.5	3	0.03	0.01	60	8.08333	5.83333	2.96667	0.04	0.01	10	4.25	4.5	1.25	0.023	0.05
IL-120	100	14.96	29.6	2.88	0.12	0.138333	90	4.975	12.8375	3.0375	0.034	0.038	80	14.075	13.525	3.4375	0.13	0.055	50	0.72	9.4	0.72	0	0	100	11.73	5.99	2.92	0.0766667	0.035	20	0.333333	3.16667	0.333333	0	0
IL-123	100	12.3	27.45	3.21	0.0957143	0.104286	100	1.67	14.5	1.67	0.01375	0.02875	80	14.9111	17.3333	3.4	0.105	0.0716667	0	0	0	0	0	0	80	14.7667	13.2222	3.04444	0.065	0.025	0	0	0	0	0	0
IL-130	90	14.6	20.75	3.77	0.1	0.0885714	50	3	9.66667	1.76667	0.02	0.0333333	70	14.5875	14.9375	3.425	0.1025	0.0575	50	0.2	4.9	0	0	0	60	10.8333	8.16667	3	0.0766667	0.0166667	10	0	6	0	0	0
IL-131	90	14.04	30.55	3.63	0.101667	0.121667	100	3.71	13.9	2.74	0.035	0.0233333	100	14.7889	16.2778	3.91111	0.12	0.078	20	0	5	0	0	0	60	13.85	12.4167	3.01667	0.105	0.025	0	0	0	0	0	0
IL-134	80	18.8	35.2778	3.63333	0.153333	0.15	80	2.37778	10.2222	1.66667	0.026	0.022	80	16.62	19.99	3.49	0.123333	0.0616667	80	0.2875	11.8125	0.2875	0	0.01	60	6.23333	4.21667	2.41667	0.04	0	20	0	4	0	0	0
Syn4	100	12.4667	18.1778	3.57778	0.0925	0.0475	70	2.6	10.1667	1.76667	0	0.001	70	11.9714	11.0714	3.22857	0.12	0.03	60	2.66667	7.33333	1.33333	0	0.005	60	7.45	4.38333	2.98333	0.04	0	10	0	8.6	0	0	0
IL-135	100	15.5	19.5111	3.8	0.09	0.0733333	80	5.7375	12.9375	2.225	0.025	0.015	100	15.95	15.8	3.13	0.12	0.035	80	4.3875	17.8375	3.1375	0.0166667	0.01	70	14.8143	17.5714	3.4	0.105	0.045	60	13.0833	11.0833	3.16667	0.075	0.025
IL-136	90	15.85	24.38	3.88	0.108333	0.11	90	3.14	11.77	2.77	0.035	0.02	80	17.1286	17.4857	3.55714	0.143333	0.0433333	70	2.58333	11	1.58333	0.015	0.015	100	13.0889	12.6111	2.86667	0.095	0.0466667	30	0	3.5	0	0	0
IL-159	80	19.6667	30.3889	3.87	0.146667	0.0733333	90	0.96	12.3	0.96	0.01	0.01	90	15.72	18.2	3.26	0.11	0.044	70	2.6	15.9286	1.54286	0.025	0.005	90	6.43	4.64	2.12	0.074	0.016	10	1.1	3.8	1.1	0	0
IL-180	100	13.07	17.15	3.74	0.085	0.0325	0	0	0	0	0	0	90	14.32	13.15	3.34	0.1025	0.025	0	0	0	0	0	0	90	9.97	8.19	3	0.0566667	0.0133333	0	0	0	0	0	0
IL-184	100	16.78	23.53	4.06	0.114286	0.101429	90	4.58889	13.3667	3.22222	0.04	0.0316667	90	21.86	14.5	3.83	0.127143	0.0685714	30	0.833333	7.33333	0.833333	0.00333333	0.00333333	80	10.875	10.375	2.625	0.08	0.03	10	9	4.5	3.2	0.08	0.05
IL-185	100	15.03	24.9	4.33	0.112857	0.0728571	100	3.41	10.95	2.54	0.0277778	0.00888889	100	17.66	18.95	3.61	0.118889	0.05	50	2.8	14.6	1.9	0.02	0.01	80	14.3875	10.825	3.525	0.111667	0.035	50	0.6	3.6	1	0.0025	0.0125
IL-186	100	14.21	22.36	4.07	0.111429	0.0557143	90	0.275	8.775	0.275	0	0.008	50	16.4714	12.6429	3.85714	0.115	0.025	70	0.583333	5.58333	0.583333	0	0.00333333	80	13.9875	8.775	2.7125	0.108	0.022	0	0	0	0	0	0
Syn5	90	18.15	32.95	4.09	0.11625	0.0925	90	4.56667	18.3889	3.77778	0.0371429	0.0242857	70	20.4125	21.375	4.475	0.138	0.042	60	0.333333	10.5667	0.28	0	0.02	70	12.75	12.5	3.5125	0.07	0.0416667	0	0	0	0	0	0
IL-212	100	6.4	11.35	3.32	0.05	0.0371429	40	4.25	12.125	2.425	0.01	0	40	6.6	6	2.5	0.04	0.015	20	0	5.6	0	0	0.005	30	9.5	6.36667	2.96667	0.0133333	0.00666667	30	0	5	0	0	0
IL-226	100	14.25	19.22	4.05	0.105	0.1	70	5.33333	15.8333	3.75	0.0366667	0.002	90	20.1875	20.125	3.35	0.135	0.0583333	70	8	12.0286	2.42857	0.01	0.00333333	70	12.8857	10.8571	2.71429	0.076	0.036	70	4.51429	6.92857	1.45714	0.0228571	0.0192857
IL-227	100	16.72	24.4	3.52	0.105	0.1	100	3.7	16.7	2.2	0.026	0.025	80	18.9667	20.7222	3.04444	0.116667	0.07	50	1	9.5	0.76	0.008	0.002	80	14.7222	12.1111	2.9	0.0955556	0.0377778	0	0	0	0	0	0
IL-248	100	13.08	17.35	3.38	0.071	0.062	90	3.6	11.8889	2.55556	0.0277778	0.02	90	13.8	12.5	2.86667	0.0744444	0.0388889	20	0	6.5	0	0	0.005	70	12.0714	8.35714	2.42857	0.0785714	0.0228571	10	7.5	8.75	2.5	0.04	0.015
IL-259	100	13.07	22	3.71	0.0814286	0.0728571	80	5.575	13	3.3125	0.04	0.018	50	9.91667	13.8	2.26667	0.0433333	0.0266667	20	0	4.25	0	0	0	70	7.45	6.5	2.33333	0.0333333	0.0133333	0	0	0	0	0	0
IL-279	100	14.3111	22.3889	3.54444	0.0988889	0.0822222	60	3.08333	12.25	1.91667	0.02	0.0116667	100	18.9111	18.2778	3.63333	0.125556	0.06	0	0	0	0	0	0	60	12.5	9.21429	2.92857	0.0771429	0.0228571	0	0	0	0	0	0
IL-303	100	15.74	21.8	3.85	0.118	0.063	70	5.96667	13.0833	3.01667	0.025	0.00666667	60	16.7167	16.1667	3.31667	0.101667	0.035	10	1.5	15	1.5	0	0	40	5.4	5.25	2	0.0475	0.0225	0	0	0	0	0	0
IL-308	90	10.9667	14.8333	4.1	0.09	0.076	70	0.714286	12.1429	0.642857	0	0.00333333	90	11.82	13.5	3.3	0.095	0.07	50	0.7	8.86	0.7	0	0.005	80	7.7875	4.275	2.7625	0.0525	0.0175	10	0	2	0	0	0
IL-355	100	17.6222	29.8333	3.63333	0.118889	0.124444	90	6.63333	14.6667	3.83333	0.04	0.0288889	100	18.5	18.0556	3.86667	0.111111	0.0966667	90	1.34444	9.91111	1.31111	0.0122222	0.0122222	30	7.33333	5	2.16667	0.0533333	0.01	20	1.8	3	1	0.01	0.016
IL-364	90	10.25	20.55	3.25	0.093	0.1	80	5.09	15.25	4.05	0.045	0.04	50	13.3667	12.3333	3.21667	0.106667	0.045	30	0	5.33333	0	0	0	20	0	3.75	0	0	0	0	0	0	0	0	0
C1	100	25.04	22.97	6.36	1.3567	0.82	70	9.92857	19.7	4.02857	0.299	0.4	90	22.5	24	6.1	1.23	0.48	60	7.13333	18.9667	3.56667	0.235	0.09	80	11.3875	3.5375	3.8375	0.53	0.1896	50	1.45	8.575	1.45	0.0159	0.09
C2	90	16.8333	27.9111	3.74444	1.12	1.35	70	17.8125	22	3.95	0.782	1.15	100	19.13	22.78	3.91	1.183	0.921	70	17.325	24.6875	3.9125	0.82	0.41	100	10.575	2.5	3.45	0.61	0.185	40	5.8	5.125	2.875	0.16	0.18
C3	100	17.29	33.61	3.88	1.23	1.42	80	12.5	23	4.07	0.81	0.71	100	14.73	22.35	3.433	1.05	0.77	80	14.3	21.1714	6.58571	0.71	0.32	100	11.33	13.57	2.93	0.82	0.49	60	7.85	15.125	2.275	0.16	0.09
C4	100	20.15	31.54	4	1.37	1.51	70	9.9	18.4	2.98889	0.8	0.8132	90	20.13	21.93	3.84	1.34	0.6752	100	4.46667	16.1444	1.81111	0.24	0.248	100	10.01	5.82	2.72	0.812	0.36	60	1.9	7.35714	1.64286	0.1	0.1356
C5	90	14.3778	28.6111	3.38889	0.95	1.035	80	11.5	18	3.8375	0.65	0.72	70	18.25	22.75	3.71	1.38	0.8	40	9.28	14.486	2.925	0.5632	0.235	80	8.29	2.98	2.98	0.52	0.27	50	4.83	4.86	2.68	0.1	0.13
C6	100	16.66	28.96	3.42	1.41	1.22	80	11.8	23.5	4.29	0.72	0.563	90	14.97	23.9	3.32	1.283	0.91	70	13.9625	21.6875	3.7125	0.753	0.34	90	13.3111	16.5889	3.87778	0.81	0.58	60	3.05	14.55	1.9	0.19235	0.14
PBW114	100	17.765	29.955	4.42	0.114286	0.115786	60	6.7875	14.6446	3.46875	0.0339286	0.0221429	85	18.2875	18.7912	3.72625	0.115625	0.06375	40	0.9375	6.45	0.5	0.00375	0.00125	90	13.82	10.3438	3.44875	0.084375	0.030625	10	0	1.15	0	0	0
BWL3279	90	19.43	30.67	4.77	0.131	0.11	90	4.17778	17.4222	2.27778	0.0444444	0.0233333	90	20.125	20.1375	4.1625	0.13625	0.06625	20	0	6	0	0	0.0666667	80	15.4125	13	2.625	0.105	0.04375	0	0	0	0	0	0
BWL4444	100	17.6333	26.3444	3.21111	0.13	0.108571	100	4.9375	18.375	2.7375	0.035	0.02	70	19.2286	16.2714	3.3	0.113333	0.0683333	10	3.75	15.75	3.25	0.05	0.025	70	11.8667	9.58333	2.53333	0.075	0.0333333	0	0	0	0	0	0
BWL3551	100	14.0556	24.3333	3.36667	0.095	0.0725	60	7.52857	14.9286	3.81429	0.035	0.015	90	18.14	20.3	3.41	0.134	0.046	60	0.666667	14.6667	0.666667	0	0.005	80	6.375	4.15	2.2875	0.0566667	0.01	0	0	0	0	0	0

## Sheet: Stage II (rep2)
Genotype	T1						T2						T3						T4						T5						T6
	25°C+0%						25°C+20%						30°C+0%						30°C+20%						35°C+0%						35°C+20%
	Germination percentage (GP; %)	Shoot length (SL; cm)	Root length (RL; cm)	Coleoptile length (CL; cm)	Shoot fresh weight (SFW; g)	Root fresh weight (RFW; g)	Germination percentage (GP; %)	Shoot length (SL; cm)	Root length (RL; cm)	Coleoptile length (CL; cm)	Shoot fresh weight (SFW; g)	Root fresh weight (RFW; g)	Germination percentage (GP; %)	Shoot length (SL; cm)	Root length (RL; cm)	Coleoptile length (CL; cm)	Shoot fresh weight (SFW; g)	Root fresh weight (RFW; g)	Germination percentage (GP; %)	Shoot length (SL; cm)	Root length (RL; cm)	Coleoptile length (CL; cm)	Shoot fresh weight (SFW; g)	Root fresh weight (RFW; g)	Germination percentage (GP; %)	Shoot length (SL; cm)	Root length (RL; cm)	Coleoptile length (CL; cm)	Shoot fresh weight (SFW; g)	Root fresh weight (RFW; g)	Germination percentage (GP; %)	Shoot length (SL; cm)	Root length (RL; cm)	Coleoptile length (CL; cm)	Shoot fresh weight (SFW; g)	Root fresh weight (RFW; g)
Syn1	100	15.1	25.7857	3.58571	0.101793	0.0917929	100	4.77143	20.1143	3.52857	0.0320167	0.0324278	100	18.05	17.6833	4.06667	0.12465	0.06785	70	17.65	20.68	4.23333	0.0759	0.0334	70	14.7333	13.3	3.75	0.0884	0.0359	10	2.2	3.5	1.5	0	0
IL-10	90	11.9286	18.9	3.3	0.0910333	0.0750333	60	2.54	13.4	1.6	0.00196667	0.0205333	70	16	16.5	2.8	0.1047	0.0569667	60	8.5	14.8333	2.9	0.0405333	0.0255333	30	13.5	6.5	3	0.106367	0.0197	30	3	2	2.5	0	0
IL-11	100	16.4286	23.0714	3.64286	0.103025	0.0963583	90	8.25	20.1667	3.91667	0.0466417	0.0293583	90	19.8333	22.5833	3.4	0.135358	0.0706417	70	15.375	24.125	3.875	0.0746917	0.0246917	70	14.75	8.25	3.325	0.104692	0.0313583	0	0	0	0	0	0
IL-14	100	16.5875	25.375	3.4375	0.116145	0.084895	50	2.25	21.625	2.125	0.011145	0.011145	100	21.643	20.92	3.37143	0.110788	0.0434979	20	0	6	0	0	0	100	14.9857	13.6143	2.7	0.104756	0.0425339	0	0	0	0	0	0
IL-15	100	16.525	23.1875	3.3125	0.127043	0.0927571	100	2.05	17.8667	1.88333	0.0001	0.0282333	80	19.5833	16.4	3.53333	0.1179	0.0321	60	0.875	10.5	0.75	0.0099	0.0132333	60	16.9333	14.0667	2.83333	0.1059	0.0379	0	0	0	0	0	0
IL-19	100	17.4286	26.0714	3.7	0.12356	0.10156	80	3	16	1.6	0.00215429	0.00641714	80	18.62	17.14	3.32	0.110227	0.0397733	70	3.125	15.125	1.675	0.01356	0.00856	70	13.7	13.4	2.56	0.110227	0.0402267	20	4	3.8	3.1	0	0
IL-21	80	15.95	27.975	3.475	0.1315	0.1315	70	5.83333	18.6667	2.96667	0.0151667	0.0281667	70	20.65	18.25	3.85	0.133167	0.0501667	60	2.66667	10.6667	1.33333	0.00065	0.0065	50	19.75	15.25	3.275	0.1185	0.0485	10	1	4	1	0.015	0.03
IL-27	80	16.15	24.85	3.5375	0.10515	0.10715	80	2.75	13.75	1.11667	0.00885	0.02115	100	15.1875	19.5625	3.225	0.104817	0.07185	50	2.75	8	1.375	0.00315	0.00315	100	7	9.41667	3.25	0.04515	0.02915	10	0	5	0	0	0
IL-29	100	21	21.6667	3.58333	0.176533	0.0965333	90	6.5	15.2857	2.92857	0.0444667	0.0355333	90	19.1	15.4286	3.98571	0.120105	0.0513238	60	3.66667	13	2.25	0.0265333	0.0215333	90	17.0833	10.25	3.75	0.1082	0.0415333	40	3.5	3	2.5	0.035	0.031
IL-30	90	14.7125	21.625	3.4625	0.109061	0.0757278	70	4.33333	16.55	2	5e-05	0.01795	90	22.2429	20.34	3.94286	0.1242	0.0483	60	6.6	18.6667	4.1	0.04795	0.02795	90	12.7857	9.85714	3.32857	0.0846167	0.02295	10	0	5	0	0	0
IL-32	100	17.5714	30	3.92857	0.140478	0.110478	90	6.57143	18.5714	3.21429	0.032855	0.022145	90	15.2857	16.5714	3.32857	0.0888117	0.042855	60	4.375	14.25	2.5	0.017145	0.012145	70	12.46	11.6	3.06	0.092145	0.017145	20	0	3.2	0	0	0
IL-35	90	12.9375	22.2375	3.4375	0.103956	0.116178	90	6	14.4714	2.67143	0.0173143	0.0455429	90	15.4167	14.5	3.86667	0.1024	0.0536	60	2.24	15.4	2.08	0.0284	0.0259	70	16.5	15.1333	3.28333	0.1084	0.0384	80	4.8	7.3	2.3	0.0271429	0.03
Syn2	80	15.025	18.775	3.7125	0.09581	0.092435	80	2	11.8333	1.86667	0.00627333	0.0203933	80	17.8125	17.1875	3.6	0.10706	0.05094	40	1.125	8.375	1.125	0.00206	0.00206	80	2.125	5	1	0.0237267	0.0537267	20	0	6.5	0	0	0
IL-39	90	11.0833	18.1667	3.3	0.09206	0.09206	60	1.45	12.125	1.45	0.00206	0.00206	80	12.5167	9.08333	3.15	0.0787267	0.0312733	50	2.2	7.2	1.5	0	0	50	8.48	7.9	2.6	0.0019	0	10	0	6	0	0	0
IL-40	90	13.06	20	3.14	0.101329	0.0813286	90	4.36	13.14	3.06	0.0143857	0.0327571	100	13.9333	16.4167	3.36667	0.1074	0.0476	40	2.75	12.125	1.75	0.0102333	0.0104	80	3	2.58333	2	0.0549	0.03365	20	0	3.5	0	0	0
IL-41	100	15.6667	25.9333	3.38333	0.11195	0.1132	90	3.58	13.36	2.78	0.0176929	0.0280214	90	17.45	17.4167	3.71667	0.1257	0.0568	40	0	6.5	0	0.01945	0.0227833	70	1	3.66667	0.833333	0.01345	0.00945	10	0	3.8	0	0	0
IL-42	90	16.4429	19.2714	3.42857	0.1334	0.0834	80	14.3	18.7	3.775	0.0449333	0.0617333	90	18	18.275	3.6	0.235067	0.114933	60	2.38	18.4	1.64	0.0084	0.0184	90	5	2.51429	2.28571	0.0884	0.0184	30	0	4	0	0	0
IL-44	100	10.9429	18.7429	3.22857	0.09	0.084	90	11.6	17.5	3.5	0.052	0.058	90	17.0333	17	3.35	0.133	0.027	90	6.5	17.9635	2.25714	0.044	0.024	80	14.8333	10.1667	3.13333	0.1055	0.0455	60	10.26	7.2	3.3	0.066	0.045
IL-45	100	16.0375	24.9375	3.325	0.12595	0.13595	80	4.08333	13.75	2.35	0.01705	0.03295	100	18.0286	19.5714	3.71429	0.15195	0.07405	80	2.75	16	2.125	0.00795	0.02795	100	14.5	12.5833	3.03333	0.121283	0.0446167	10	13	9.5	3.42	0.07	0.0233
IL-47	90	17.1143	19.2857	3.62857	0.1165	0.0665	90	4.5625	14.2125	2.575	0.0185	0.0265	100	15.6875	15.0625	3.6625	0.0985	0.0535	100	2.36667	10.75	1.61667	0.0065	0.0165	90	13.6857	12.7857	3.75714	0.0998333	0.0398333	20	8	7	3.5	0.035	0.035
IL-50	80	12.4	20.36	3.18	0.107929	0.119357	70	5.36667	17.6667	2.6	0.0355	0.0465	80	16.38	17.26	3.44	0.137929	0.0577857	80	0	15	0	0.0265	0.0365	90	16.9333	12	3.13333	0.1305	0.0305	70	5.66667	7	2.06667	0.035	0.03
IL-51	90	10.1667	16.0833	2.08333	0.085	0.085	70	1.33333	10.2333	1.33333	0.005	0.005	80	13.7833	12.1667	3.26667	0.0875	0.025	60	1.16667	8.9	1.16667	0.005	0.005	50	3.65	0.75	2.15	0.005	0.005	20	0	2.5	0	0	0
IL-54	80	11.0714	22.1429	2.65714	0.09465	0.07865	70	10.3	8.4	0.21	0.01215	0.01215	80	14.5	13.2429	3.12857	0.0813167	0.0220167	70	12.5	5.725	0.25	0	0	90	13.9	12.3333	2.88333	0.08865	0.03065	50	10.8333	11.3333	3.16667	0.045	0.028
IL-56	90	7.8	12.5714	2.21429	0.0469783	0.0219783	10	0	6.5	0	0	0	70	20.4	20.6	3.8	0.126978	0.00968833	0	0	0	0	0	0	80	12.2	9.32	2.7	0.088645	0.018645	10	0	6.1	0	0	0
IL-66	100	12.6143	16.2571	2.87143	0.07956	0.08756	60	0.775	6.55	0.31	0	0.00356	70	15.6	15.7	3.25	0.0902267	0.0297733	20	0	3	0	0	0	90	6.74286	3.71429	2.18571	0.05556	0.01756	20	0	3.56	0	0	0
IL-68	100	10.8333	15.25	2.91667	0.05315	0.07815	40	0	5	0	0	0	90	10.5	15.9167	2.16667	0.10065	0.04935	10	0	2	0	0	0	100	12.9167	11.0833	3.16667	0.08315	0.03315	30	4.5	2.5	7.6	0.03	0.031
IL-77	100	15.6	22.15	3.1	0.1147	0.0880333	10	0	2	0	0	0	80	16.5714	15.3571	3.21429	0.133033	0.0369667	10	0	5	0	0	0	100	13.625	11.0625	2.725	0.0701762	0.0258905	0	0	0	0	0	0
IL-79	100	14.7125	20.525	3.6875	0.098145	0.102145	30	0	4.2	0	0	0.007145	90	13.75	11.9375	2.6625	0.090145	0.031855	10	0	3	0	0	0	30	5	2	2.5	0.012145	0.002145	0	0	0	0	0	0
IL-80	100	12.0143	20.1571	2.5	0.09706	0.07956	70	0	5.91667	0	0	0.00206	100	14.5714	13.1429	2.92857	0.10006	0.02994	0	0	0	0	0	0	90	3.91667	3.33333	1.86667	0.05956	0.00956	10	0	2	0	0	0
IL-87	90	16.1875	22.8	3.0125	0.12406	0.11606	30	0	7.5	0	0	0.00706	90	19.2143	17.5714	4.07143	0.12706	0.04294	10	0	4.5	0	0	0	90	12.325	9.5	2.525	0.0703933	0.01206	30	0.5	5.5	0.5	0.045	0.02
IL-91	90	12.75	20.925	3.3375	0.0943905	0.065819	70	1.83333	9.08333	1.5	0	0.00903333	90	21.9714	19.1429	3.72857	0.1232	0.0368	40	1.25	4.5	1	0.0682	0	60	2	3	1.05	0.00653333	0.00153333	20	0	2.5	0	0	0
IL-95	100	20.6875	29.625	3.9375	0.125358	0.125358	90	3.45714	12.6429	3.05714	0.0336417	0.0288583	100	19.0875	18.5625	3.875	0.113358	0.0666417	30	0	5	0	0	0	90	14.8571	11.7143	3.08571	0.0993583	0.0473583	0	0	0	0	0	0
IL-98	90	20.125	31.3125	3.9625	0.1539	0.137233	80	0.75	9.4375	0.4375	0	0	80	16.2667	13.6667	4.15	0.1089	0.0011	0	0	0	0	0	0	80	18.0857	14	3.01429	0.121757	0.0489	30	0	3.2	0	0	0
IL-102	100	15.8143	25.3429	3.02857	0.1234	0.0854	60	7.3	17.175	4.525	0.0476	0.0574	80	21.58	20.6	3.66	0.1474	0.0726	40	0.375	4.25	0.375	0	0	60	4.96	4.22	3	0.0674	0.0440667	20	0	3	0	0	0
IL-103	80	15.3	26.9375	3.8625	0.11755	0.09255	70	11.15	20.8	4.475	0.0611167	0.04555	80	18.9167	19.75	3.68333	0.14305	0.0682	30	0	2.5	0	0.0122167	0.00888333	40	12.9333	10.6667	2.5	0.09555	0.03555	10	0	1	0	0	0
IL-105	70	11.6	15.75	3.73333	0.0789333	0.0589333	70	1.88333	10.9167	1.38333	0.00373333	0.00893333	70	15.4	13.4	3.48	0.0939333	0.0460667	40	0	2.5	0	0	0	70	11.8	8.9	3.5	0.123933	0.0539333	10	0	12	0	0	0
IL-106	90	16.5	25.25	3.88333	0.0947583	0.102258	70	2.7	11.32	2	0.0177417	0.028925	70	16.4	16.12	3.58	0.118925	0.0577417	50	0.375	6.5	0.375	0	0	80	12.9286	11.5714	2.84286	0.0722583	0.0342583	40	1.7	6.5	1.7	0.025	0.071
Syn3	100	17.9286	31.6429	3.27143	0.16635	0.14235	90	7.41667	17.2	2.43333	0.02715	0.04035	80	17.5875	16.6875	3.2125	0.1566	0.0709	90	4.35	11.4167	1.8	0.02785	0.02035	90	12.9375	10.75	3.1125	0.11285	0.06285	30	5	5.5	1.8	0.018	0.015
IL-115	80	15.7429	20.0714	3.9	0.104545	0.024545	80	8.6625	14.975	3.4125	0.0421217	0.024545	80	12.5143	12.4714	3.05714	0.104545	0.055455	60	2.75	7.75	2.025	0	0.00787833	70	4.72	1.56	1.92	0.004545	0.004545	20	2	7.5	2	0.025	0
IL-119	90	16.5667	25.5	2.85	0.0974667	0.0908	60	3.5	11.6667	1.83333	0.0102	0.0015	80	16.85	15.75	3.38333	0.167467	0.0825333	30	3.15	10.75	3	0.0408	0.0208	70	8.75	6.875	3.075	0.0508	0.0208	20	8.5	6	2.5	0.0563	0.045
IL-120	100	15.1375	29.875	2.85	0.12446	0.142793	80	5.95	13.6167	3.36667	0.02954	0.04246	80	13.5833	12.6667	3.53333	0.13446	0.05054	60	1.2	11.1667	1.2	0	0	90	12.125	6.2375	2.9625	0.0811267	0.03946	10	1	4.5	1	0	0
IL-123	100	12.2375	26.8125	3.1625	0.103114	0.111686	90	1.8375	13.875	1.8375	0.00635	0.03615	90	14.4286	17.3571	3.35714	0.1124	0.0642667	10	0	3	0	0	0	90	15.3286	13.2857	3.2	0.0724	0.0324	10	0	1.5	0	0	0
IL-130	100	14.6375	20.875	3.9	0.1059	0.0944714	60	2.625	9.25	1.4	0.0141	0.0392333	80	14.0333	13.3333	3.31667	0.1084	0.0516	30	0.333333	5.66667	0	0	0	70	4.5	3.5	2	0.0825667	0.0225667	20	0	3.5	0	0	0
IL-131	90	13.8875	30.4375	3.6625	0.105717	0.125717	100	3.3875	13.1875	2.6375	0.03095	0.0273833	90	13.9429	15.1429	3.87143	0.12405	0.07395	0	0	0	0	0	0	60	14.025	12.5	3.025	0.10905	0.02905	10	0	2.5	0	0	0
IL-134	100	18.8571	34.3571	3.67143	0.155767	0.152433	90	2.77143	10.2143	1.85714	0.0235667	0.0244333	100	17.5125	20.05	3.675	0.125767	0.0592333	70	0.383333	10.1667	0.383333	0	0.0124333	50	6.975	4.825	2.375	0.0424333	0.00243333	10	0	1.8	0	0	0
Syn4	80	13.0714	17.8714	3.6	0.095545	0.050545	50	3.9	11.75	2.65	0	0.0012	80	11.36	10.6	3.22	0.123045	0.026955	50	3.625	7.875	1.625	0	0.008045	50	7.8	4.7	3	0.043045	0.003045	10	0	6	0	0	0
IL-135	100	15.0714	19.5143	3.81429	0.0993	0.0826333	80	7.65	16	2.96667	0.0157	0.0243	80	16.125	15.9375	3.125	0.1293	0.0257	90	3.93333	16.5333	3.01667	0.0259667	0.0193	70	13.74	17.3	3.5	0.1143	0.0543	70	13.75	12	3.2	0.082	0.031
IL-136	80	15.3125	24.0375	3.825	0.111293	0.11296	100	3.1375	12.275	2.675	0.03204	0.02296	60	16.36	16.38	3.46	0.146293	0.0403733	50	3.875	10.5	2.375	0.01796	0.01796	90	12.3857	11.9571	2.64286	0.09796	0.0496267	20	0	4.5	0	0	0
IL-159	90	20.7143	30.7857	3.81857	0.149627	0.0762933	100	1.075	13.0625	1.075	0.00704	0.01296	100	15.9625	17	3.3	0.11296	0.04104	80	2.44	15.3	1.46	0.02796	0.00796	100	6.35	4.3	2.15	0.07696	0.01896	0	0	0	0	0	0
IL-180	90	12.25	16.4375	3.5875	0.09535	0.04285	0	0	0	0	0	0	90	14.2625	13.25	3.3	0.11285	0.01465	20	0	3.5	0	0	0	100	10.2	8.4875	3.0625	0.0670167	0.0236833	10	1	5	1	0	0
IL-184	90	15.7875	21.6625	3.925	0.123586	0.110729	80	5.07143	13	3.32857	0.0307	0.0409667	80	22.575	14.3125	3.7875	0.136443	0.0592714	10	0	3	0	0.0126333	0.0126333	70	9.6	10.6667	2.33333	0.0893	0.0393	20	5.6	8	2.9	0.065	0.049
IL-185	100	14.375	24.375	4.35	0.121757	0.0817571	90	4.2625	12.0625	3.175	0.0188778	0.0177889	80	17.825	19.375	3.6625	0.127789	0.0411	30	2	13.1667	1.16667	0.0289	0.0189	90	13.3167	10.2167	3.46667	0.120567	0.0439	60	0	4	0	0.0032	0.015
IL-186	90	12.7625	19.95	4	0.120279	0.0645643	70	0.366667	8.95	0.366667	0	0.0017	60	15.2	12.7	3.8	0.12385	0.01615	60	0.375	5.75	0.375	0	0.0121833	70	14.9167	8.78333	2.63333	0.11685	0.03085	10	0	3.6	0	0	0
Syn5	100	18.5	33.0625	4.3	0.12365	0.0999	100	5.22857	19.2857	4.21429	0.0297429	0.0316857	80	19.7667	20.5	4.38333	0.1454	0.0346	50	0.5	8.175	0.35	0	0.0274	80	11.4167	12.0833	3.38333	0.0774	0.0490667	0	0	0	0	0	0
IL-212	90	6.875	13.1875	3.3375	0.0574	0.0445429	30	3	10	2.3	0.0026	0.0074	60	7.66667	7.16667	2.66667	0.0474	0.0076	20	0	6	0	0	0.0124	30	10	8.6	3	0.0207333	0.0140667	20	0	6	0	0	0
IL-226	100	13.375	18.5	4.1875	0.1109	0.1059	70	6.2	16	4.075	0.0307667	0.0259	80	20.3333	19.25	3.33333	0.1409	0.0524333	60	10.3	12.24	2.8	0.0159	0.00923333	60	11.84	10.8	2.44	0.0819	0.0419	60	6.32	7.8	2.04	0.0328571	0.0142857
IL-227	100	15.8375	22.25	3.525	0.11055	0.10555	100	2.1625	15.75	1.6625	0.02045	0.03055	80	18.2429	20.1429	3.01429	0.122217	0.06445	50	1.66667	11.5	1.26667	0.01355	0.00755	100	14.0714	11.7857	2.87143	0.101106	0.0433278	10	0	2.1	0	0	0
IL-248	100	13.525	18.25	3.475	0.075545	0.066545	80	3.17143	11.7143	2.14286	0.0232328	0.024545	100	13.1	12.5714	2.85714	0.0789894	0.0343439	30	0	6.5	0	0	0.009545	80	13.2	9	2.6	0.0831164	0.0274021	20	6	9	2.5	0.035	0.0163
IL-259	90	13.775	22.1875	3.825	0.0858886	0.0773171	90	5.48333	12.5833	3.05	0.03554	0.02246	50	6.375	11.45	1.65	0.0477933	0.0222067	20	0	6	0	0	0	60	6.875	6.5	2.125	0.0377933	0.0177933	0	0	0	0	0	0
IL-279	100	14.0429	22.6429	3.55714	0.102939	0.0862722	50	2.25	10.625	2	0.01595	0.0157167	80	17.6	18.2143	3.57143	0.129606	0.05595	10	0	7	0	0	0	70	11.8	8.1	2.8	0.0811929	0.0269071	20	0	3.2	0	0	0
IL-303	90	15.05	21.875	3.8125	0.121933	0.0669333	60	7.3	13	3.375	0.0210667	0.0106	50	17.5	19.5	3.4	0.1056	0.0310667	20	1.5	15	1.5	0	0	50	6.3	6.5	2	0.0514333	0.0264333	20	1.3	3.2	1.3	0	0
IL-308	100	10.8143	13.8571	3.98571	0.093045	0.079045	90	1	12.4	0.9	0	0	100	12.3375	14	3.3125	0.098045	0.066955	30	0.666667	9.1	0.666667	0	0.008045	100	8.33333	4.53333	2.63333	0.055545	0.020545	10	0	3.5	0	0	0
IL-355	90	18.3571	31.2143	3.65714	0.121849	0.127404	80	6.24286	14.5	3.71429	0.03704	0.0318489	80	18	18.3571	3.9	0.114071	0.0937067	80	1.22857	9.88571	1.18571	0.0151822	0.0151822	20	2	0	2	0.0562933	0.01296	10	0	2	0	0.025	0.0199
IL-364	100	10.625	22.375	3.3125	0.0954333	0.102433	100	5.0875	15.375	3.9375	0.0425667	0.0424333	60	12.55	10.25	3.2	0.1091	0.0425667	20	0	5.5	0	0	0	10	0	3	0	0	0	10	0	3.6	0	0	0
C1	100	26.9375	24.375	6.7125	1.15	0.82	80	7.3	17.28	3.34	0.3	0.4	80	21	22.5	6.24286	0.75	0.48	50	5.5	14.9	2.75	0.18	0.12	90	11.1667	3.01667	3.93333	0.65	0.17	40	1.75	9.25	1.75	0.02	0.089
C2	100	16.6857	27.2429	3.78571	1.1	1.2	80	18	23.7333	4	0.75	1.2	90	19.0875	22.9375	3.9125	1.23	0.82	70	17.4167	24.1667	3.8	0.71	0.21	90	10.7167	2.5	3.381	0.423	0.21	60	3.1	4.5	2.35	0.132	0.102
C3	90	16.9875	33.2375	3.725	1.41	1.38	80	14.5	22	3.9875	0.65	0.65	100	14.4375	21.25	3.29125	1.16	0.8	60	13.98	19.04	7.46	0.58	0.36	90	10.5375	12.3	2.7875	0.91	0.61	40	9.45	17.5	3.05	0.1992	0.1
C4	100	19.3125	31.1125	3.975	1.42	1.48	80	10.8	18.4714	2.9	0.85365	0.78	100	20.035	21.35	3.675	1.462	0.8235	90	5.6	18.9714	2.18571	0.236	0.23	100	9.425	5.5875	2.625	0.6854	0.38	80	1.66	7.4	1.4	0.156	0.12
C5	100	16.2714	29.6429	3.64286	0.103	1.3	70	13.7	17	3.8	0.71	0.83	70	17.725	22.93	3.6375	1.44	0.768	50	8.56	15.063	2.71667	0.6	0.26	90	8.5125	2.975	3.0875	0.483	0.244	40	3.625	4.26667	2.46667	0.1978	0.189
C6	100	16.5375	28.5125	3.5	1.34	1.298	80	12.45	24.5	4.2125	0.788	0.5	80	14.8375	22	3.3	1.19	0.91	80	14.2	22.4167	3.78333	0.7	0.286	70	13.1143	16.1857	3.8	0.83	0.555	50	2.25	12.325	1.5	0.16325	0.1987
PBW114	95	17.7312	30.4125	4.4	0.122711	0.124211	80	7.26	14.445	3.51	0.0255036	0.0305679	85	18.1	18.3146	3.7	0.12405	0.055325	35	0	4.15	0	0.00775	0.00525	80	14.2917	11.0646	3.46042	0.0928	0.03905	10	0	1.25	0	0	0
BWL3279	80	19.85	31.0875	4.775	0.1375	0.1165	90	5.37143	17.3286	2.92857	0.0379444	0.0298333	80	20.4167	18.9333	4.21667	0.14275	0.05975	10	0	4	0	0	0.0731667	90	15.6333	13.25	2.58333	0.1115	0.05025	0	0	0	0	0	0
BWL4444	90	17.1714	25.5857	3.31429	0.13945	0.118021	70	4.66667	16.4167	2.48333	0.02555	0.02945	80	19.62	16.08	3.32	0.122783	0.0588833	30	3.5	16.5	3.5	0.05945	0.03445	70	13.175	9.5	2.425	0.08445	0.0427833	10	0	2.3	0	0	0
BWL3551	90	12.9286	22.6429	3.21429	0.1058	0.0833	80	7.44	14.7	3.74	0.0242	0.0258	90	18.3	19	3.4	0.1448	0.0352	50	0.625	15	0.625	0.0108	0.0158	100	5.91667	4.11667	2.21667	0.0674667	0.0208	0	0	0	0	0	0

## Sheet: Stage II (rep3)
Genotype	T1						T2						T3						T4						T5						T6
	25°C+0%						25°C+20%						30°C+0%						30°C+20%						35°C+0%						35°C+20%
	Germination percentage (GP; %)	Shoot length (SL; cm)	Root length (RL; cm)	Coleoptile length (CL; cm)	Shoot fresh weight (SFW; g)	Root fresh weight (RFW; g)	Germination percentage (GP; %)	Shoot length (SL; cm)	Root length (RL; cm)	Coleoptile length (CL; cm)	Shoot fresh weight (SFW; g)	Root fresh weight (RFW; g)	Germination percentage (GP; %)	Shoot length (SL; cm)	Root length (RL; cm)	Coleoptile length (CL; cm)	Shoot fresh weight (SFW; g)	Root fresh weight (RFW; g)	Germination percentage (GP; %)	Shoot length (SL; cm)	Root length (RL; cm)	Coleoptile length (CL; cm)	Shoot fresh weight (SFW; g)	Root fresh weight (RFW; g)	Germination percentage (GP; %)	Shoot length (SL; cm)	Root length (RL; cm)	Coleoptile length (CL; cm)	Shoot fresh weight (SFW; g)	Root fresh weight (RFW; g)	Germination percentage (GP; %)	Shoot length (SL; cm)	Root length (RL; cm)	Coleoptile length (CL; cm)	Shoot fresh weight (SFW; g)	Root fresh weight (RFW; g)
Syn1	80	14.8857	25.9286	3.58571	0.0924929	0.0824929	90	4.11429	18.0429	2.88571	0.0413167	0.0231278	90	18.55	17.85	3.98333	0.11535	0.07715	80	17.4	23.6833	4.31667	0.07525	0.03275	90	14.6333	13.8	3.7	0.088075	0.035575	20	2.2	3.5	1.5	0	0
IL-10	100	13.1429	21.0429	3.51429	0.0849667	0.0689667	80	1.7	13.9	1	0.00803333	0.0144667	60	15.9	15	2.9	0.0986333	0.0630333	50	9.83333	17.8333	2.93333	0.0398833	0.0248833	20	14.75	7.5	3.5	0.106042	0.019375	20	3	2	2.1	0	0
IL-11	80	17.7857	25.5	3.78571	0.100308	0.0936417	80	8.41667	19.4167	3.83333	0.0493583	0.0266417	80	19.9167	22.3333	3.48333	0.132642	0.0733583	90	15.125	24.875	3.9	0.0740417	0.0240417	50	14.75	8.375	3.25	0.104367	0.0310333	20	0	3.8	0	0	0
IL-14	100	17.375	25.25	3.5625	0.108855	0.077605	70	1.5	22.75	1.375	0.003645	0.003645	90	20.0429	19.2143	3.45714	0.103498	0.0507879	30	0	6.25	0	0	0	80	15.1714	13.6857	2.74286	0.104431	0.0422089	0	0	0	0	0	0
IL-15	90	16.225	22.5625	3.325	0.107243	0.0729571	70	1.75	18.7833	1.58333	0.0199	0.00843333	70	19.5	15.6667	3.48333	0.0981	0.0519	50	0.875	10.375	0.75	0.00925	0.0125833	50	16	13.5667	2.8	0.105575	0.037575	0	0	0	0	0	0
IL-19	100	17.2143	24.7857	3.55714	0.11644	0.09444	70	2.6	16	1.5	0.00927429	0.00927429	70	19.42	17.04	3.42	0.103107	0.0468933	70	3.925	17.375	2.475	0.01291	0.00791	60	14.42	13.3	2.68	0.109902	0.0399017	10	2	2	2	0	0
IL-21	90	15.45	27.0375	3.45	0.1185	0.1185	80	4.75	18.4167	2.41667	0.0281667	0.0151667	80	19.8167	17.75	3.75	0.120167	0.0631667	50	1.5	9.66667	1.16667	0.000585	0.00585	60	18.575	14.375	3.25	0.118175	0.048175	20	1.8	2	1.8	0.018	0.025
IL-27	90	16.525	25.4125	3.5375	0.09885	0.10085	70	1.41667	11.6667	0.5	0.01515	0.01485	80	16.4375	20.875	3.325	0.0985167	0.07815	50	1.875	7	0.875	0.0025	0.0025	80	8.5	10.5	3.08333	0.044825	0.028825	20	0	3.5	0	0	0
IL-29	90	19.5	22.1667	3.66667	0.173467	0.0934667	80	5.35714	15.1429	2.78571	0.0475333	0.0324667	100	19.1714	15.2143	3.9	0.117038	0.0543905	70	4.75	16.0833	3.08333	0.0258833	0.0208833	80	17.0833	10.5833	3.75	0.107875	0.0412083	10	3.5	1.8	2.3	0.028	0.025
IL-30	100	15.4	22.75	3.3375	0.0931611	0.0598278	100	2.75	14.8833	1.25	0.01595	0.00205	90	24	22	3.87143	0.1083	0.0642	50	7.26667	16	4.3	0.0473	0.0273	80	13.2857	10.3286	3.61429	0.0842917	0.022625	10	0	2	0	0	0
IL-32	100	16.9286	29.2143	3.92857	0.136188	0.106188	80	5.35714	18.1429	3.14286	0.037145	0.017855	90	17.7857	19.3571	3.58571	0.0845217	0.047145	60	3.25	11.5	1.625	0.016495	0.011495	60	11.96	11.4	2.96	0.09182	0.01682	10	0	4	0	0	0
IL-35	100	13.875	23.55	3.5375	0.0871556	0.0993778	90	6.88571	14.7857	2.65714	0.0341143	0.0287429	80	15.2167	14.5833	3.75	0.0856	0.0704	60	3.3	15.6	2.68	0.02775	0.02525	70	15.8667	15.05	3.36667	0.108075	0.038075	60	4	6.4	2.22	0.0291429	0.032
Syn2	100	14.5625	19.0625	3.625	0.09169	0.088315	90	1.33333	12.6667	1.2	0.0103933	0.0162733	100	19.375	19.475	3.875	0.10294	0.05506	60	0.625	7.875	0.625	0.00141	0.00141	60	1.875	4.875	0.75	0.0234017	0.0534017	10	0	3.8	0	0	0
IL-39	100	11.25	19.3333	3.46667	0.08794	0.08794	70	0.875	9.875	0.875	0.00206	0.00206	70	13.8333	10	3.18333	0.0746067	0.0353933	70	1.9	6.7	1.2	0	0	70	8.3	7.9	2.6	0.0021	0	30	0	3.8	0	0	0
IL-40	100	12.34	18.7	3.24	0.0815286	0.0615286	90	3.06	10.64	2.66	0.0341857	0.0129571	90	15.2333	17.0833	3.76667	0.0876	0.0674	50	2.125	10.375	1.125	0.00958333	0.00975	80	2.66667	2.41667	1.83333	0.054575	0.033325	10	0	1.5	0	0	0
IL-41	80	15.75	25.6	3.46667	0.09305	0.0943	70	3.44	14.06	2.74	0.0365929	0.00912143	100	16.6167	17.05	3.63333	0.1068	0.0757	60	3	9.25	1.5	0.0188	0.0221333	60	1	2.5	1	0.013125	0.009125	0	0	0	0	0	0
IL-42	80	15.9429	18.7714	3.35714	0.1166	0.0666	90	13.5	19.5	3.9	0.0617333	0.0449333	90	17.875	18.275	3.5375	0.218267	0.131733	70	2.08	18	1.34	0.00775	0.01775	80	5.35714	2.32857	2.5	0.088075	0.018075	40	0	3.25	0	0	0
IL-44	100	10.7286	18.6	3.25714	0.074	0.068	90	13.2667	20	3.6	0.068	0.042	80	16.2833	16.7167	3.35	0.117	0.043	100	6.288	17.92	2.3	0.04335	0.02335	70	15	10.25	3.3	0.105175	0.045175	70	9.52	6.5	3.3	0.07	0.036
IL-45	90	15.475	24.8125	3.25	0.11005	0.12005	80	3.66667	12.9167	1.93333	0.03295	0.01705	90	18.3143	20.2143	3.85714	0.13605	0.08995	50	1.75	12.875	1.375	0.0073	0.0273	80	13.8333	12	2.86667	0.120958	0.0442917	10	13	9.5	3.28	0.0687	0.03
IL-47	100	18.1857	20	3.48571	0.1035	0.0535	100	5.0125	16.275	3.025	0.0315	0.0135	100	15.625	15.0625	3.7	0.0855	0.0665	80	2.36667	11.8333	1.61667	0.00585	0.01585	100	13.9	12.7857	3.61429	0.0995083	0.0395083	40	4	5.5	1.75	0.0424	0.015
IL-50	70	13.5	22.2	3.28	0.0949286	0.106357	80	4.03333	14.1667	2.5	0.0485	0.0335	100	16.98	18.36	3.5	0.124929	0.0707857	60	1.25	16	1.25	0.02585	0.03585	100	15.7	12.5	3.16667	0.130175	0.030175	50	3	5	1	0.04	0.028
IL-51	70	11.4167	16.3333	2.08333	0.075	0.075	50	1.33333	9.66667	1.33333	0.005	0.005	90	14.1167	12.75	3.33333	0.0775	0.035	60	0.5	8.4	0.5	0.00435	0.00435	70	5.025	1.125	2.15	0.004675	0.004675	30	0	2.25	0	0	0
IL-54	90	12.5	21.2857	2.72857	0.08535	0.06935	80	11.6	8.6	0.21	0.00465	0.00285	90	14.2143	13.3143	3.12857	0.0720167	0.0313167	60	12	5.475	0.3	0	0	80	14.2	13.1667	2.96667	0.088325	0.030325	40	11	12.1667	3.16667	0.055	0.018
IL-56	80	6.8	10.3571	2.28571	0.0396883	0.0146883	10	0	3.2	0	0	0	80	21	20.8	3.8	0.119688	0.0169783	0	0	0	0	0	0	60	12.4	9.82	2.9	0.08832	0.01832	10	0	2.1	0	0	0
IL-66	90	12.3286	16.5	2.87143	0.07244	0.08044	60	0.4	5.3	0.1	0	0.002	90	15.8667	15.7833	3.31667	0.0831067	0.0368933	0	0	0	0	0	0	80	8.67143	5.5	2.54286	0.055235	0.017235	0	0	0	0	0	0
IL-68	100	11.0833	15.3333	3.08333	0.04685	0.07185	30	0	5.5	0	0	0	80	13.3333	18.1667	2.66667	0.09435	0.05565	20	0	3.5	0	0	0	80	12.9167	11.75	3.25	0.082825	0.032825	10	4.5	2.5	8	0.015	0.02
IL-77	100	15.5375	22.15	3.0375	0.108633	0.0819667	0	0	0	0	0	0	90	16.9286	16	3.14286	0.126967	0.0430333	0	0	0	0	0	0	90	13.3125	11.1875	2.6625	0.0698512	0.0255655	10	0	1.8	0	0	0
IL-79	90	14.65	20.65	3.65	0.093855	0.097855	20	0	4	0	0	0.002855	100	15.0625	12.875	2.7875	0.085855	0.036145	0	0	0	0	0	0	10	5	2	2.5	0.01182	0.00182	0	0	0	0	0	0
IL-80	100	10.9429	19.0143	2.57143	0.09294	0.07544	90	0	6	0	0	0.001	90	14.9286	13.7143	3.02857	0.09594	0.03406	20	0	1.3	0	0	0	80	3	2.5	1.61667	0.059235	0.009235	10	0	1.5	0	0	0
IL-87	100	16.3125	21.9875	2.975	0.11994	0.11194	30	0	7.66667	0	0	0.00294	100	19.7143	17.2857	4.07143	0.12294	0.04706	30	0	4.5	0	0	0	90	11.2	8.8125	2.3875	0.0700683	0.011735	20	0.5	5.5	0.5	0.005	0.024
IL-91	100	11.4375	18.425	3.275	0.0913238	0.0627524	100	1.83333	11.1667	1.5	0.00153333	0.00596667	90	22.8286	19.0714	3.58571	0.120133	0.0398667	50	1.875	3.625	1.5	0.06755	0	50	2.5	2.6	1.1	0.00620833	0.00120833	0	0	0	0	0	0
IL-95	90	20.8125	29.875	3.9	0.122642	0.122642	70	4.17143	13.7143	3.7	0.0363583	0.0261417	90	19.275	18.3125	3.875	0.110642	0.0693583	20	0	5	0	0	0	90	16.3571	12.2857	3.21429	0.0990333	0.0470333	0	0	0	0	0	0
IL-98	80	21	32.625	3.9625	0.1361	0.119433	90	0.4375	9.5	0.4375	0	0	90	15.2667	12.8333	4.18333	0.0911	0.0189	10	0	3	0	0	0	90	17.7286	13.2857	3.01429	0.121432	0.048575	0	0	0	0	0	0
IL-102	100	15.4571	24.7714	3.21429	0.1086	0.0706	70	6.75	17.425	4.375	0.0624	0.0426	70	21.04	21.3	3.76	0.1326	0.0874	60	0	3.75	0	0	0	60	5.16	4.82	3	0.067075	0.0437417	30	0	3	0	0	0
IL-103	90	15.925	26.8125	3.8625	0.10645	0.08145	60	10.15	18.675	4.55	0.0722167	0.03445	70	18.5	19.9167	3.71667	0.13195	0.0793	30	1.1	8.5	1.1	0.0115667	0.00823333	60	12.1	10.3333	2.5	0.095225	0.035225	0	0	0	0	0	0
IL-105	80	11.85	16.3333	3.65	0.0710667	0.0510667	90	1.68333	9.58333	1.18333	0.00393333	0.00106667	70	15.4	13	3.36	0.0860667	0.0539333	30	0	3.2	0	0	0	60	12.96	9.9	3.5	0.123608	0.0536083	20	0	13.5	0	0	0
IL-106	100	14.8333	23.1667	3.78333	0.0902417	0.0977417	80	1.96	10.72	1.86	0.0222583	0.0244083	60	17.2	17.72	3.54	0.114408	0.0622583	70	0.375	5.875	0.375	0	0	80	13.2143	12.2143	2.84286	0.0719333	0.0339333	20	0.85	6.25	0.85	0.03	0.0563
Syn3	80	18.2857	30.7857	3.27143	0.14565	0.12165	80	9.83333	19.8667	3.1	0.04785	0.01965	100	17.8375	16.8125	3.2125	0.1359	0.0916	80	4.35	10.9167	1.8	0.0272	0.0197	90	12.6875	10.3125	3.1125	0.112525	0.062525	30	2.5	5.75	0.9	0.028	0.01
IL-115	90	15.9571	20.3571	3.88571	0.095455	0.015455	100	9.0125	14.975	3.4125	0.0512117	0.015455	90	12.8714	12.6857	2.98571	0.095455	0.064545	70	1.75	6.5	1.375	0	0.00722833	70	4.5	1.76	1.88	0.00422	0.00422	30	1	5.75	1	0.011	0
IL-119	100	16.2667	26.0833	2.81667	0.0758667	0.0692	40	3.16667	11.1667	1.66667	0.0114	0.0017	90	17.9333	16.5833	3.28333	0.145867	0.104133	40	2.1	10	3	0.04015	0.02015	60	8.25	5.875	2.95	0.050475	0.020475	20	8.5	6	2.5	0.04	0.035
IL-120	100	15.5125	30.5	2.7625	0.11554	0.133873	80	4.3	12.0333	3.13333	0.03846	0.03354	90	13.25	12.7833	3.45	0.12554	0.05946	50	0.7	8.83333	0.7	0	0	100	12.0375	6.1125	2.9625	0.0808017	0.039135	10	0.5	3.25	0.5	0	0
IL-123	90	11.75	26.25	3.225	0.0883143	0.0968857	100	1.9625	15.4375	1.9625	0.02115	0.02135	90	15.2143	17.2143	3.4	0.0976	0.0790667	10	0	2	0	0	0	90	15.4571	13.1429	3.2	0.072075	0.032075	10	0	3.5	0	0	0
IL-130	100	14.4375	20.1875	3.8375	0.0941	0.0826714	70	3.375	9.875	1.525	0.0259	0.0274333	90	14.0333	14.1667	3.4	0.0966	0.0634	60	0.333333	4.66667	0	0	0	50	8	6.5	2.5	0.0822417	0.0222417	10	0	5.5	0	0	0
IL-131	100	14.6125	31.0625	3.6875	0.0976167	0.117617	90	3.2	13.4375	2.675	0.03905	0.0192833	80	14.3	16.0714	4.01429	0.11595	0.08205	0	0	0	0	0	0	50	13.525	12	2.975	0.108725	0.028725	0	0	0	0	0	0
IL-134	100	19.1429	35.0714	3.58571	0.1509	0.147567	90	1.8	9.35714	1.5	0.0284333	0.0195667	90	16.5125	19.3	3.4875	0.1209	0.0641	70	0.383333	11.5	0.383333	0	0.0117833	50	6.25	4	2.625	0.0421083	0.00210833	0	0	0	0	0	0
Syn4	90	14.1429	20.5857	3.67143	0.089455	0.044455	60	3.125	10.375	1.875	0	0.0018	60	12.06	10.9	3.3	0.116955	0.033045	70	2	6.375	1.125	0	0.007395	60	7.3	4.65	3.05	0.04272	0.00272	20	0	4.3	0	0	0
IL-135	90	15.0714	19.0143	3.72857	0.0807	0.0640333	60	7.23333	14.8333	2.55	0.0343	0.0057	100	16.25	16.3125	3.1625	0.1107	0.0443	80	4.43333	17.45	3.05	0.0253167	0.01865	70	14.1	18.5	3.5	0.113975	0.053975	50	12.125	10.625	3.2	0.061	0.0265
IL-136	70	15.5	23.5375	3.85	0.105373	0.10704	90	3.225	11.5875	2.7625	0.03796	0.01704	70	16.26	15.98	3.56	0.140373	0.0462933	60	3.25	9.125	1.75	0.01731	0.01731	90	12.7429	12.7429	2.72857	0.097635	0.0493017	30	0	4	0	0	0
IL-159	100	19	28.7857	3.80429	0.143707	0.0703733	80	1.075	11.875	1.075	0.01296	0.00704	100	16.15	17.8125	3.2625	0.10704	0.04696	70	2.2	15.1	1.22	0.02731	0.00731	90	6.6	4.8625	2.15	0.076635	0.018635	0	0	0	0	0	0
IL-180	100	13	17.1875	3.825	0.07465	0.02215	0	0	0	0	0	0	100	14.3375	13.1875	3.3	0.09215	0.03535	0	0	0	0	0	0	90	10.025	8.3625	3.0625	0.0666917	0.0233583	0	0	0	0	0	0
IL-184	80	16.075	22.975	4.05	0.104986	0.0921286	100	4.4	12.6429	2.87143	0.0493	0.0223667	90	21.8875	14.1875	3.75	0.117843	0.0778714	30	1.25	7.75	1.25	0.0119833	0.0119833	60	12.2	11.1667	2.91667	0.088975	0.038975	10	8	6	3	0.07	0.032
IL-185	100	14.5	24.875	4.3625	0.103957	0.0639571	100	3.6	11.375	2.6375	0.0366778	0.0177889	100	17.2625	19.125	3.575	0.109989	0.0589	60	2	14.3333	1.33333	0.02825	0.01825	80	14.1833	11.05	3.41667	0.120242	0.043575	40	1	3.66667	1.66667	0.00183	0.0111
IL-186	100	12.2625	20.2	3.9625	0.102579	0.0468643	80	0.366667	9.45	0.366667	0.00885	0.001685	70	15.66	12.6	3.8	0.10615	0.03385	50	0.5	5.125	0.5	0	0.0115333	80	14.5667	8.28333	2.61667	0.116525	0.030525	0	0	0	0	0	0
Syn5	100	18.6875	33.5625	4.3	0.10885	0.0851	90	5.11429	19.9286	4.1	0.0445429	0.0168857	90	20.5833	21.6667	4.38333	0.1306	0.0494	60	0.5	7.7	0.35	0	0.02675	90	11.5	12.25	3.46667	0.077075	0.0487417	20	1.1	3.8	1.1	0	0
IL-212	100	7.0625	12.4375	3.2125	0.0426	0.0297429	50	4.33333	12	2.56667	0.0174	0.002	50	8.5	7.66667	2.76667	0.0326	0.0224	20	0	6	0	0	0.01175	20	8.25	6.3	3.05	0.0204083	0.0137417	20	0	3.8	0	0	0
IL-226	100	13.625	18.625	4.0625	0.0991	0.0941	70	6.45	16.75	4.075	0.0425667	0.0141	80	20.75	19.5833	3.35	0.1291	0.0642333	70	9.2	13.24	2.7	0.01525	0.00858333	70	12.5	10.9	2.62	0.081575	0.041575	70	3.92	6.9	1.34	0.0385714	0.015
IL-227	90	16.3375	23.625	3.5875	0.09945	0.09445	90	2.225	16	1.725	0.03155	0.01945	90	19.0286	20.1429	3.01429	0.111117	0.07555	50	0	6.83333	0	0.0129	0.0069	90	14.4286	11.7143	2.87143	0.100781	0.0430028	10	0	1	0	0	0
IL-248	100	13.2875	17.9375	3.35	0.066455	0.057455	90	3.52857	11.9286	2.28571	0.0323228	0.015455	90	13.3857	12.1429	2.9	0.0698994	0.0434339	10	0	6.5	0	0	0.008895	70	12.8	8.7	2.56	0.0827914	0.0270771	30	6	9	2.5	0.0146	0.022
IL-259	80	13.275	21.6875	3.8875	0.0769686	0.0683971	70	5.78333	13.5	3.11667	0.04446	0.01354	60	8.125	10.7	1.65	0.0388733	0.0311267	20	0	6	0	0	0	50	7.375	7	2.25	0.0374683	0.0174683	0	0	0	0	0	0
IL-279	100	14.2571	22.6429	3.55714	0.0948389	0.0781722	80	4.625	11.125	2.875	0.02405	0.00761667	80	18.4571	18.5714	3.64286	0.121506	0.06405	0	0	0	0	0	0	80	11.76	8.6	2.9	0.0808679	0.0265821	0	0	0	0	0	0
IL-303	80	15.9875	22.625	3.75	0.114067	0.0590667	60	7.075	13.5	3.4	0.0289333	0.00273333	50	15.5	16.25	3.15	0.0977333	0.0389333	10	1.5	15	1.5	0	0	40	5.86667	5.5	2	0.0511083	0.0261083	0	0	0	0	0	0
IL-308	90	9.81429	14.5	3.94286	0.086955	0.072955	70	1	12.4	0.9	0	0	90	11.125	13.3125	3.25	0.091955	0.073045	60	0.666667	8.83333	0.666667	0	0.007395	80	8.33333	5.16667	2.63333	0.05522	0.02022	0	0	0	0	0	0
IL-355	100	17.2286	28.6429	3.58571	0.115929	0.121484	90	6.37143	14.5	3.71429	0.04296	0.0259289	90	17.2143	17.9286	3.75714	0.108151	0.0996267	90	1.22857	10.2429	1.18571	0.0145322	0.0145322	30	8	5.5	2.25	0.0559683	0.012635	20	0	2	0	0.016	0.015
IL-364	90	11.05	21.3125	3.3125	0.0905667	0.0975667	90	5.1875	15.9375	3.975	0.0474333	0.0375667	60	14.05	13.875	3.45	0.104233	0.0474333	20	0	6.25	0	0	0	10	0	3	0	0	0	0	0	0	0	0	0
C1	100	23.8	21.65	6.1375	1.25	0.82	60	11.4	20.66	4.26	0.325	0.4	80	23	25	5.87143	1	0.48	60	5.2	19.375	2.6	0.22	0.1568	100	12.55	4.25	3.86667	0.53	0.16589	30	1.26667	8.1	1.26667	0.02654	0.1
C2	90	17.2571	28.8143	3.78571	1.0561	1.14	70	19	20	3.98333	0.81	1.35	80	18.675	22.5625	3.8	1.301	0.75	70	17.9167	25.75	3.9	0.681	0.35	100	10.5667	2.41667	3.4	0.51	0.3158	50	4	4.83333	2.66667	0.194	0.4563
C3	100	17.2	33.8429	3.68571	1.33	1.28	80	14.2857	21	4.07143	0.71	0.85	100	14.0714	21.3571	3.37571	1.26	0.77	70	14.7	20.55	8.725	0.6	0.28	100	10.2429	12.0286	2.74286	0.75	0.54	50	6.3	13.3333	2.03333	0.132	0.075
C4	100	19.7286	30.8286	3.98571	1.37	1.39	90	8.1	16.9167	2.93333	0.75	0.78	90	19.68	22.28	3.9	1.32	0.79	80	2.66667	11.4667	1.16667	0.24	0.22	90	9.72857	5.72857	2.72857	0.75	0.4	70	1.96	7.24	1.76	0.1	0.12
C5	90	13.4429	27.2714	3.25714	0.8965	1.2	70	10	18.5	3.75	0.82	0.655	80	17.65	22.1578	3.6625	1.56	0.921	50	10.68	16.61	3.26667	0.689	0.1985	90	8.9125	3.0375	3.1	0.621	0.31	40	5.4	5.5	2.53333	0.16	0.153
C6	100	16.825	31.1625	3.4	1.286	1.199	70	11.7875	26.6875	4.425	0.698	0.45	90	14.3375	23.125	3.25	1.1325	0.91	70	13.7143	21.4286	3.72857	0.69	0.4065	90	13.6857	17.1857	3.98571	0.79	0.621	70	3.05	14.55	1.9	0.0896	0.0982
PBW114	90	17.925	30.7563	4.4	0.105861	0.107361	80	6.60333	15.37	3.29333	0.0423536	0.0137179	95	18.0542	18.3917	3.7	0.1072	0.072175	45	1.25	6.76667	0.666667	0.007425	0.004925	85	13.8021	10.6479	3.41042	0.092475	0.038725	5	0	1	0	0	0
BWL3279	90	19.1625	30.4625	4.7375	0.1245	0.1035	80	3.8	17.3286	2.18571	0.0509444	0.0168333	80	20.5333	19.4667	4.15	0.12975	0.07275	30	0	6	0	0	0.0725167	90	15.6667	12.9	2.73333	0.111175	0.049925	0	0	0	0	0	0
BWL4444	100	17.4857	26.4	3.3	0.12055	0.0991214	80	5.08333	16.9167	2.6	0.04445	0.01055	70	19.62	16.32	3.3	0.103883	0.0777833	20	3.5	16.5	3.5	0.0588	0.0338	60	11.8	8.625	2.425	0.084125	0.0424583	10	0	1.8	0	0	0
BWL3551	100	13.5	22.5	3.32857	0.0842	0.0617	70	7.64	13.9	3.74	0.0458	0.0042	100	18.55	19.875	3.4	0.1232	0.0568	50	0.625	12.625	0.625	0.01015	0.01515	80	6.75	4.16667	2.28333	0.0671417	0.020475	0	0	0	0	0	0

## Sheet: Stage III (E1)
		Days to heading		Spiklet number		Spike length (cm)		PH		Tiller number		Maturity		Yield (grm)
Sl.No.	Genotype	R1	R2	R1	R2	R1	R2	R1	R2	R1	R2	R1	R2	R1	R2
1	Syn1	97	97	19.6667	19.5	13.75	13.75	98.18	96.16	84	74	158	156	456	420
2	IL-10	102	100	17.3333	19	11	12.5	81.18	84.66	76	73	156	156	470	435
3	IL-11	100	100	20.3333	18.5	9.5	12.5	91.5133	94.16	60	76	155	158	360	390
4	IL-14	106	102	20.6667	23	11.5	12	104.513	100.66	70	71	153	154	552	530
5	IL-15	104	106	19	19.5	13.5	14.5	113.847	108.66	81	88	157	151	500	465
6	IL-19	90	90	20.6667	17.5	14	14	90.8467	94.16	82	89	153	158	365	385
7	IL-21	100	102	10	13	7.25	7.25	85.8467	86.66	91	107	155	158	224	210
8	IL-27	100	100	18	20.5	10.25	9.75	97.8467	93.66	53	45	154	156	280	310
9	IL-29	90	92	19.3333	19.5	9.25	11.75	76.18	76.66	41	36	145	147	260	295
10	IL-30	98	98	20.3333	20.5	10.5	11.5	102.847	104.66	82	81	146	145	400	435
11	IL-32	99	97	17	16	10.75	7.75	98.8467	99.16	90	87	156	152	510	525
12	IL-35	104	105	20.6667	21	10.75	8.75	114.513	115.16	92	80	155	156	433	460
13	Syn2	92	88	16.6667	17.5	8	10	122.18	117.66	142	148	154	150	492	475
14	IL-39	104	108	21.3333	21	8.25	10.75	107.847	110.16	103	98	156	152	540	500
15	IL-40	105	105	23.6667	24	14.25	13.75	102.513	106.16	105	94	152	157	400	365
16	IL-41	109	107	21.6667	22	11.5	10.5	81.5133	81.16	86	116	155	151	460	485
17	IL-42	106	102	20	20.5	12.5	11	102.18	103.16	104	108	150	147	510	482
18	IL-44	106	106	23.6667	23	11.5	13	95.5133	98.16	55	81	157	156	415	442
19	IL-45	118	114	21.3333	21	9.5	11.5	98.18	100.16	80	73	153	158	515	501
20	IL-47	114	113	19.6667	19.5	12.5	9.5	90.5133	89.66	72	101	154	159	490	502
21	IL-50	106	104	20	18	9	13	96.5133	92.66	109	114	153	154	575	568
22	IL-51	113	113	24	25	10.75	11.25	92.8467	92.66	70	53	157	153	500	492
23	IL-54	121	121	22.6667	22.5	12	11.5	101.513	100.66	38	59	154	156	370	409
24	IL-56	124	126	21	21	12	10.5	101.18	102.66	129	119	157	156	328	315
25	IL-66	106	103	16.6667	17.5	11	12.5	91.5133	89.16	92	103	155	155	320	331
26	IL-68	110	110	18.6667	19.5	10	10	104.847	100.66	78	109	156	158	380	403
27	IL-77	106	108	19.3333	22.5	11.75	13.75	116.847	116.16	164	133	157	153	466	470
28	IL-79	92	94	19.3333	19	13.5	11	100.513	105.16	90	96	151	150	348	325
29	IL-80	100	103	18.3333	18	14.25	12.75	104.513	97.66	140	157	152	153	450	415
30	IL-87	100	96	18.6667	18.5	13.75	13.75	93.8467	96.16	111	97	153	153	480	465
31	IL-91	113	115	26.6667	23	13.75	13.25	124.847	123.16	132	133	154	158	500	550
32	IL-95	101	101	20	21.5	12.75	12.75	105.847	103.16	138	118	153	154	490	475
33	IL-98	89	91	18.6667	19.5	14.25	10.75	116.847	109.66	91	107	157	151	422	445
34	IL-102	115	117	19.6667	16.5	11.75	13.25	120.18	119.16	87	87	153	153	420	398
35	IL-103	95	97	18	18	9	9	95.8467	93.16	39	45	154	156	345	351
36	IL-105	85	84	13.3333	16.5	8	11.5	94.8467	94.16	71	93	154	150	290	330
37	IL-106	113	113	22.6667	22.5	11.75	11.25	102.18	103.16	102	117	160	157	375	350
38	Syn3	108	110	18.3333	20.5	13.75	10.25	108.18	111.16	33	29	156	158	480	465
39	IL-115	115	115	21	17.5	11	9	85.5133	84.66	110	88	156	153	525	490
40	IL-119	116	116	22.6667	25.5	10.25	12.25	87.18	86.66	62	69	155	153	199	215
41	IL-120	113	113	21.3333	20	8.25	8.75	89.8467	89.16	32	37	157	160	428	465
42	IL-123	123	119	17.3333	18	10.75	10.25	98.8467	100.16	37	47	159	155	395	412
43	IL-130	103	103	21.3333	21	11.5	10	104.847	102.66	32	37	153	157	435	451
44	IL-131	102	106	15.3333	17.5	9.25	7.25	110.513	114.16	49	43	153	157	391	375
45	IL-134	103	103	19	20.5	9	8.5	101.847	98.16	78	70	155	161	542	515
46	Syn4	114	112	18.3333	20	8.25	10.75	96.18	95.16	116	58	153	150	608	590
47	IL-135	119	121	21.3333	21	11.5	11	108.513	110.66	43	34	155	158	478	460
48	IL-136	116	116	19.6667	24	8.75	9.75	96.8467	93.16	70	99	153	154	552	540
49	IL-159	115	118	24.3333	22	11	11.5	106.18	108.66	80	97	155	156	440	455
50	IL-180	113	110	20	20.5	11.75	9.75	91.5133	87.66	51	42	157	154	475	469
51	IL-184	102	102	21	20.5	15	14	97.18	97.66	40	48	146	147	443	428
52	IL-185	110	114	18	20.5	13	13.5	83.18	78.66	45	68	156	157	438	410
53	IL-186	104	102	21.3333	22.5	8.75	10.75	90.8467	91.16	68	63	155	157	520	570
54	Syn5	107	103	21.3333	20.5	11.75	14.25	83.18	84.66	90	66	154	157	535	515
55	IL-212	93	93	21.6667	22.5	14.5	14	94.5133	94.16	53	66	155	153	460	495
56	IL-226	110	112	19.6667	20.5	14.5	11.5	100.513	98.16	147	159	154	155	460	445
57	IL-227	110	113	22	22	13.75	15.25	103.18	106.16	108	116	157	153	578	585
58	IL-248	105	105	17.3333	19	8.75	8.75	106.847	106.16	66	42	148	153	545	515
59	IL-259	119	123	20.6667	20.5	11	8	113.513	110.66	68	55	161	159	615	622
60	IL-279	94	94	17.6667	17.5	10.75	7.75	107.18	107.66	113	102	153	155	460	445
61	IL-303	111	109	19.6667	20	11.75	11.75	117.513	116.16	51	40	153	151	301	265
62	IL-308	110	110	20	19	14.5	14.5	105.18	104.66	36	54	157	155	568	552
63	IL-355	114	114	18	18.5	10.75	8.75	106.18	108.16	150	137	153	156	491	483
64	IL-364	109	107	20	21	11.25	14.25	102.18	99.16	81	89	155	157	625	628
65	C1	113	116	22.3333	22	11.5	11.25	139.333	135	97	96	159	158	225	215
66	C2	108	105	17.6667	18	11.5	11.5	86.6667	89.5	86	117	152	149	410	415
67	C3	113	117	21	21	11.8333	12	94.6667	94	67	63	156	155	625	620
68	C4	115	110	19.6667	20	12	11.75	104.333	105.5	143	118	153	152	500	490
69	C5	112	120	21.3333	21	11.1667	11	97	98.5	67	82	152	148	525	495
70	C6	107	110	18	18	10.5	10	94.6667	96	109	113	151	153	545	510
71	PBW114	87	89	14	11.5	8	7.6	78.8467	80.16	73	61	155	157	380	350
72	BWL3279	89	86	19	18.5	11	11.5	83.5133	85.66	36	50	157	156	450	400
73	BWL4444	100	100	19	22.5	10	9.5	92.18	90.66	80	79	154	154	510	525
74	BWL3551	114	112	17.6667	21	8.75	9.25	94.18	95.66	71	76	154	157	559	565

## Sheet: Stage III (E2)
		Days to heading		Spiklet number		Spike length (cm)		PH		Tiller number		Maturity		Yield (grm)
Sl.No.	Genotype	R1	R2	R1	R2	R1	R2	R1	R2	R1	R2	R1	R2	R1	R2
1	Syn1	95	100	17.6667	18.5	11.3333	11.75	107.333	108.5	90	82	152	153	383	375
2	IL-10	97	100	17.3333	18	10.3333	10.5	84.3333	86.5	82	75	152	154	397	388
3	IL-11	98	101	19.3333	19.5	10.6667	10.5	93	95	53	65	152	153	299	304
4	IL-14	101	105	20.6667	21	13.3333	13	102	99.5	70	62	151	153	521	514
5	IL-15	103	108	18	18.5	12.6667	12.5	102.667	98.5	75	82	152	150	428	432
6	IL-19	89	96	19.6667	19.5	11.8333	12	97.3333	100	58	55	152	155	317	308
7	IL-21	97	118	10	11	7.5	6.75	88.6667	88	72	68	152	154	170	158
8	IL-27	95	99	17	17.5	11.1667	11.25	101.333	98.5	52	65	152	153	251	277
9	IL-29	89	93	17.3333	16.5	10.8333	10.75	76	78	48	39	140	143	231	226
10	IL-30	97	102	19.3333	19.5	10	9.5	99	103	59	51	145	142	361	345
11	IL-32	96	98	15	15	8.5	8.75	90.6667	90	85	79	152	150	468	479
12	IL-35	102	107	19.6667	20	10.5	10.25	104.667	106.5	89	95	152	151	390	402
13	Syn2	87	98	15.6667	16.5	9.33333	9	115	111	82	88	152	149	429	415
14	IL-39	103	109	18.3333	19	10.5	9.75	100.667	101	65	58	151	149	468	476
15	IL-40	104	109	22.6667	22	12.1667	13.25	97.6667	102	70	65	151	155	323	318
16	IL-41	106	108	19.6667	20	9.83333	9.5	87.3333	88.5	90	100	152	148	424	432
17	IL-42	101	107	19	18.5	12	12	94	93.5	99	105	148	146	447	450
18	IL-44	105	108	22.6667	22	12.3333	12.5	94	96	79	86	152	154	375	388
19	IL-45	113	116	18.3333	20	11.3333	11	100.667	101.5	85	72	152	153	539	530
20	IL-47	112	116	18.6667	18.5	11.6667	11.5	91.3333	90.5	80	92	151	154	438	449
21	IL-50	101	105	18	18	10.8333	11	90.3333	89.5	76	83	151	153	527	535
22	IL-51	112	116	23	24	12.1667	12.25	90.3333	91	65	53	152	152	448	440
23	IL-54	120	122	20.6667	21.5	10.6667	11	101	100.5	59	65	153	153	337	341
24	IL-56	121	123	20	19	10	10	96.3333	97	75	63	153	154	271	263
25	IL-66	101	109	15.6667	17.5	9.66667	10.5	83.6667	82	79	86	152	151	270	276
26	IL-68	109	113	18.6667	18.5	11	11	98.3333	97.5	70	82	154	156	335	339
27	IL-77	105	113	20.3333	20.5	13.1667	13.25	117	116.5	104	95	152	150	427	415
28	IL-79	89	100	17.3333	18	12	12.5	99.3333	101.5	57	68	150	146	282	301
29	IL-80	98	102	16.3333	17	11.8333	12.25	103.333	101	90	96	149	151	379	386
30	IL-87	95	101	17.6667	16.5	12.5	13.25	99.6667	101	70	62	149	148	417	403
31	IL-91	112	116	24.6667	25	15	14.75	120.667	122	97	88	151	155	516	509
32	IL-95	100	104	19	20.5	12.1667	11.75	100	100	80	76	151	152	431	426
33	IL-98	86	95	17.6667	18.5	12.8333	12.25	110.333	106	53	65	152	149	378	390
34	IL-102	114	118	16.6667	15.5	10.5	11.25	112.667	112	78	72	152	148	358	348
35	IL-103	94	98	17	17	10.6667	10	83.3333	83	58	50	151	151	296	291
36	IL-105	82	86	15.3333	15.5	9.83333	9.5	85	85	78	85	152	149	258	261
37	IL-106	108	113	21.6667	21.5	10.5	10.75	96	95	80	92	155	155	315	325
38	Syn3	107	115	17.3333	18.5	11.6667	11.75	101	104	69	55	155	153	417	408
39	IL-115	114	117	18	18.5	10.6667	10.5	90.6667	91.5	106	95	152	150	458	441
40	IL-119	113	115	21.6667	22.5	11.5	11.25	89.3333	89	60	50	152	151	145	135
41	IL-120	111	113	19.3333	20	10	9.75	81.6667	82.5	68	72	155	157	394	386
42	IL-123	118	121	16.3333	16	9.83333	9.75	85.3333	86	75	83	154	150	351	376
43	IL-130	102	106	19.3333	20	9.66667	9.5	87.6667	87.5	80	71	152	152	387	375
44	IL-131	101	106	16.3333	16.5	8.83333	8.75	88.6667	91	66	73	150	154	326	330
45	IL-134	100	105	18	18.5	10	10	87.3333	85.5	135	142	153	156	472	490
46	Syn4	109	112	18.3333	19	10	9.75	83.6667	82.5	73	62	148	147	554	548
47	IL-135	118	121	20.3333	20	10.3333	10.5	92.6667	94.5	80	76	154	157	410	398
48	IL-136	111	112	21.6667	23	11.3333	10.75	89	86.5	50	65	150	152	492	501
49	IL-159	113	118	23.3333	23	12.5	12.5	97.3333	100	85	76	153	155	394	380
50	IL-180	108	112	18	18.5	10.5	10.75	95.3333	92.5	90	81	152	153	417	405
51	IL-184	101	106	20	19.5	13	13	90	90	70	68	145	145	383	372
52	IL-185	109	111	17	18.5	12	12.5	93	90.5	75	70	152	154	371	364
53	IL-186	101	104	18.3333	19.5	10.1667	9.75	84	86	80	74	152	155	560	554
54	Syn5	102	112	20.3333	20.5	12.5	13.25	76.3333	76.5	84	78	152	152	466	452
55	IL-212	92	101	19.6667	21.5	12.6667	13.5	97.6667	97.5	85	92	152	152	430	426
56	IL-226	107	112	18.6667	17.5	12.6667	12.5	99.6667	98	97	88	152	151	398	386
57	IL-227	108	110	20	20	13	13.25	100.667	101	90	102	152	150	537	549
58	IL-248	100	102	18.3333	18	9.83333	9.75	94	94	90	86	147	148	476	462
59	IL-259	118	125	19.6667	19.5	10	10	115.667	114	107	93	157	155	575	563
60	IL-279	93	99	15.6667	16.5	9.66667	8.75	98.3333	97.5	79	68	150	150	401	389
61	IL-303	108	111	18.6667	19	10.8333	11.25	109.333	109	92	103	151	150	234	250
62	IL-308	109	112	20	20	12.3333	12.5	102.333	103	55	72	152	153	498	503
63	IL-355	113	116	16	16.5	10	10.25	99.3333	102.5	104	91	152	153	425	411
64	IL-364	106	113	19	19	12	12.25	100	100	78	86	152	155	550	575
65	C1	107	118	17	18	9.83333	9.25	127.667	127	55	48	153	150	138	130
66	C2	97	107	15	16	9.83333	9.5	82.3333	82	95	102	154	154	271	282
67	C3	112	115	20.3333	21	11.1667	11.5	91	92.5	80	93	152	152	573	582
68	C4	105	111	19.6667	20	11.6667	12	88.6667	90	76	68	149	153	316	310
69	C5	113	118	20.3333	22	9.66667	9	85.6667	85.5	48	54	155	156	208	216
70	C6	105	111	18.3333	18	12.1667	11.75	84.3333	82.5	88	93	152	153	343	348
71	PBW114	84	91	13	11.5	6.33333	6	69.6667	69.5	75	86	153	153	318.5	325
72	BWL3279	84	94	18	17.5	10.5	10.5	87.6667	88.5	72	81	152	152	376	369
73	BWL4444	99	104	20	21.5	11.3333	11	92.3333	91	62	70	151	150	470	482
74	BWL3551	109	116	19.6667	20	10.3333	10.25	96.3333	96.5	90	100	153	154	505	517

## Sheet: Stage III (E3)
		Days to heading		Spiklet number		Spike length (cm)		PH		Tiller number		Maturity		Yield (grm)
Sl.No.	Genotype	R1	R2	R1	R2	R1	R2	R1	R2	R1	R2	R1	R2	R1	R2
1	Syn1	91	90	19.3333	20	12	11.75	97.6667	95.5	92	101	145	144	272	280
2	IL-10	92	90	18.6667	18.5	10	9.75	87.3333	87.5	112	103	148	151	385	375
3	IL-11	93	95	21	21	10.5	10.5	91	92.5	86	79	145	148	259	248
4	IL-14	93	94	20.3333	20.5	20.6667	18.75	106	105	80	95	147	150	365	375
5	IL-15	94	95	21	21	14	13.75	114	113	82	76	150	151	255	251
6	IL-19	92	94	18	18	11	11.25	91.6667	92.5	91	97	146	145	380	390
7	IL-21	95	96	22	21.5	14.6667	14.75	90	90	75	87	150	152	286	310
8	IL-27	92	91	15	15	8.66667	9	86.3333	85	100	88	148	148	435	415
9	IL-29	90	89	17	17	9.16667	9	86	88	55	48	147	147	375	365
10	IL-30	91	89	19	19	8.66667	8.5	96	94.5	70	81	146	146	540	545
11	IL-32	92	92	20	21	9	9	96.3333	95.5	82	73	150	151	328	315
12	IL-35	93	93	20.6667	20.5	10	10	107.333	106	88	81	147	145	390	385
13	Syn2	91	90	18.6667	20	11	11	114	114.5	115	123	149	150	490	532
14	IL-39	96	93	19.6667	20	9.5	9.5	97.3333	98	109	98	154	151	420	409
15	IL-40	93	94	20	19.5	9.83333	10	94	93.5	98	86	149	152	520	495
16	IL-41	92	92	20	20	8.5	8.25	67.3333	66	80	91	145	144	385	392
17	IL-42	89	91	20.3333	20.5	9.83333	10.5	90.6667	93	74	68	148	147	395	380
18	IL-44	91	93	20.6667	20.5	10.8333	11	90.6667	92	54	65	144	144	450	455
19	IL-45	92	92	17.6667	18	9.16667	9.25	87.3333	88	82	76	147	148	310	295
20	IL-47	91	91	18	18	11.3333	11.5	82	81.5	79	88	146	144	460	480
21	IL-50	89	92	17.3333	17	9.33333	9	94	92	98	103	145	149	450	472
22	IL-51	91	90	19	19	10.3333	10.5	86	86	89	95	153	151	430	440
23	IL-54	98	100	19	19.5	10	10	86.3333	85.5	45	53	153	150	165	172
24	IL-56	98	95	18.3333	18.5	9.5	9.25	87	86.5	115	121	152	156	475	485
25	IL-66	92	91	19.6667	18.5	10.6667	10.5	90.6667	90.5	83	76	153	152	395	378
26	IL-68	93	93	21.3333	21.5	10.3333	10.25	96.6667	95.5	86	91	155	157	502	508
27	IL-77	95	96	23.3333	23.5	14.1667	14.25	104.333	105	129	118	147	151	555	550
28	IL-79	92	92	22	21	13.1667	13	104.333	106.5	104	92	149	147	425	410
29	IL-80	95	95	18	17.5	11.8333	12.5	106	101.5	115	123	148	152	415	425
30	IL-87	91	93	19.3333	19.5	11.6667	11.5	101	101	97	85	145	148	535	522
31	IL-91	91	91	25.6667	25	12.8333	13	108	106.5	88	95	155	156	415	439
32	IL-95	93	94	20	19.5	11.5	11.25	105	103.5	101	92	151	157	480	475
33	IL-98	95	97	21	20	13.5	13.25	106.667	106.5	91	103	150	149	390	401
34	IL-102	97	96	19.3333	19.5	11	10.5	105	104	81	91	148	150	400	405
35	IL-103	85	86	17.3333	17	10.3333	10.25	92	93	63	55	145	147	385	369
36	IL-105	88	87	19	19	10.6667	10.75	101.667	101	114	120	148	148	475	480
37	IL-106	94	93	24.6667	24.5	11	11	100	101.5	84	78	148	154	450	445
38	Syn3	90	91	16	16	10.6667	10.5	110	111	35	47	148	152	375	382
39	IL-115	94	95	18	18	9.33333	9.5	77.3333	77	80	72	149	150	335	325
40	IL-119	93	92	19.6667	19	9.5	9.75	90.6667	91.5	78	86	148	150	480	490
41	IL-120	94	93	19	19	9.5	9.25	90.3333	89	52	63	151	153	420	435
42	IL-123	95	96	18	18.5	9.5	9.5	92.6667	94.5	35	29	151	153	430	425
43	IL-130	89	89	18	17.5	7.83333	8.25	102	101	30	46	150	151	425	435
44	IL-131	90	90	18.6667	18.5	8.83333	8.75	105.333	105	40	30	147	147	475	455
45	IL-134	92	92	19.3333	19.5	9.33333	9	96.6667	95	55	48	147	152	500	480
46	Syn4	94	91	18.3333	18.5	8.66667	8.75	90	90	75	61	148	146	542	526
47	IL-135	97	98	20.3333	20.5	11.6667	12	99	100	42	53	144	144	440	460
48	IL-136	94	94	20.3333	20.5	10	9.75	87	87.5	95	88	145	146	460	459
49	IL-159	93	95	23.3333	23.5	12.3333	11.75	100.667	99	62	73	155	154	315	325
50	IL-180	93	92	18.3333	18	10.3333	10.75	89.6667	88.5	40	38	145	151	425	415
51	IL-184	90	89	20	20	12.5	12.75	95	97.5	35	40	145	144	450	463
52	IL-185	91	92	19	18.5	11.1667	11.25	80.6667	80	60	51	148	146	465	453
53	IL-186	89	91	20	19.5	9.33333	9.25	90	87.5	55	42	144	145	475	465
54	Syn5	90	92	18.3333	18	9	9	81.3333	83	65	58	145	144	285	275
55	IL-212	90	90	23	23.5	12.1667	12.25	97.6667	96.5	40	53	148	144	380	395
56	IL-226	96	93	20.3333	20.5	13	12.5	104	103.5	114	121	150	151	330	345
57	IL-227	98	99	21.6667	21.5	13.3333	13	102.333	103.5	102	109	152	152	345	356
58	IL-248	90	90	19.3333	19	9.16667	9	87.3333	86	42	36	146	143	350	345
59	IL-259	97	97	19.6667	19.5	11.8333	11.5	95	95	28	35	147	148	550	528
60	IL-279	91	90	19	19	13.5	13.25	103.667	103.5	72	80	148	146	148	159
61	IL-303	92	91	16.3333	16	9	9.25	101	101.5	48	38	144	146	465	471
62	IL-308	90	89	18.3333	18	10.5	10.25	95	94	59	52	145	145	340	335
63	IL-355	95	94	17.3333	17.5	9.83333	9.75	91.6667	89.5	115	121	146	152	225	230
64	IL-364	91	90	18.3333	18	10.3333	10.5	94.3333	93.5	58	63	145	143	345	352
65	C1	95	98	19.6667	20	10	10	117	114.5	125	118	159	157	145	138
66	C2	86	89	10	10	17.3333	17	85	84.5	90	105	151	151	320	335
67	C3	90	95	18.6667	19.5	9	9.5	82.6667	82	88	80	159	156	550	548
68	C4	94	96	19.6667	19.5	10.5	10.5	95.6667	96.5	115	106	153	154	540	530
69	C5	91	94	17.6667	18	9.16667	9	81.6667	84	105	97	151	149	410	390
70	C6	89	92	15.6667	15.5	8.66667	8.75	85	85	100	112	153	149	480	468
71	PBW114	93	93	16	16	6	6	83.6667	86	87	75	144	143	248	238
72	BWL3279	91	91	18	17.5	10.8333	10.75	96	97	79	72	148	152	362	360
73	BWL4444	93	96	16.6667	17	8	8	84.6667	84	110	116	156	155	205	215
74	BWL3551	94	94	21.3333	21.5	10.8333	11	87	87.5	60	51	147	149	485	465

## Sheet: Stage III (E4)
		Days to heading		Spiklet number		Spike length		PH		Tiller number		Maturity		Yield (grm)
Sl.No.	Genotype	R1	R2	R1	R2	R1	R2	R1	R2	R1	R2	R1	R2	R1	R2
1	Syn1	89	91	19.3333	18	11.3333	11	107	108	98	109	116	115	199	210
2	IL-10	89	90	16.3333	15.5	9.33333	8.75	90.6667	89.5	118	105	116	116	269	259
3	IL-11	92	93	19.3333	20	10.1667	10.25	92.6667	93.5	79	68	117	116	189	180
4	IL-14	91	93	19.3333	19	13.8333	13.5	103.667	104	80	86	116	114	231	237
5	IL-15	91	92	19	19.5	13.3333	13	103	103	76	70	119	123	231	225
6	IL-19	91	93	19.3333	19.5	11.1667	11	98.3333	98.5	67	63	116	117	140	138
7	IL-21	93	95	19.3333	19	10.6667	11	93	91.5	56	48	119	122	123	115
8	IL-27	89	90	17	16.5	8.33333	8	90	90	99	108	118	120	309	315
9	IL-29	86	87	16.3333	17	9.5	8.75	86	89.5	74	82	116	116	301	309
10	IL-30	88	90	16.6667	16.5	7.5	7.5	92.3333	93	47	51	116	115	335	348
11	IL-32	91	93	19.3333	19.5	9.33333	9	88.3333	86.5	77	65	119	119	277	265
12	IL-35	91	93	20.3333	21	10	10	97.6667	97.5	85	96	117	116	289	300
13	Syn2	88	90	19	18.5	11.3333	11.25	107	108	55	63	120	120	301	309
14	IL-39	92	94	20.6667	21	10	10	90.3333	89	71	58	122	119	161	148
15	IL-40	91	92	19.6667	19.5	10.8333	10.5	89.3333	89.5	63	57	121	124	143	137
16	IL-41	89	90	20.3333	20.5	9.5	9.25	73.3333	73.5	84	75	116	114	316	307
17	IL-42	88	89	18.3333	18.5	10.6667	10.5	82.6667	83.5	69	65	116	115	279	275
18	IL-44	89	91	17	17	9.83333	10	89.3333	90	78	70	116	113	223	215
19	IL-45	89	90	16.3333	16	9.66667	9.75	90	89.5	87	75	116	118	187	175
20	IL-47	90	91	17	17	9.83333	10.25	83	82.5	87	79	116	115	267	259
21	IL-50	88	90	15	15.5	9.33333	9.25	88	89	65	72	116	117	177	184
22	IL-51	89	91	19.3333	19.5	10.5	10.25	83.6667	84.5	84	95	121	123	265	276
23	IL-54	98	99	22.3333	22.5	12.1667	12.75	86	85.5	71	59	125	122	163	152
24	IL-56	94	95	19.3333	19.5	10.1667	9.75	82.3333	81	61	65	123	124	161	165
25	IL-66	89	92	20.3333	20.5	10.5	10.5	83	83.5	70	59	121	122	153	148
26	IL-68	92	93	19.6667	20	9	9.25	90.3333	92.5	78	64	127	128	179	165
27	IL-77	93	94	22	22.5	13	13.25	104.667	105.5	69	80	118	122	363	374
28	IL-79	89	90	16.3333	16	10.8333	10.75	103.333	103	71	64	117	115	227	220
29	IL-80	91	92	17.3333	17	13	13.5	105	105	65	62	120	123	175	180
30	IL-87	89	90	20.3333	20	12.1667	12.5	107	106	56	50	116	116	295	289
31	IL-91	88	92	22.6667	23.5	12.3333	12.5	104	105.5	53	50	123	124	231	228
32	IL-95	92	93	18.6667	20	11.3333	11	99.3333	100.5	43	50	123	125	145	152
33	IL-98	93	94	21	21	13.1667	13	100.333	103	53	61	119	120	193	201
34	IL-102	94	95	17.6667	17.5	10.6667	10.75	97.6667	97	72	76	118	122	223	227
35	IL-103	84	85	16	16	9	8.75	79.6667	83	82	75	116	115	115	108
36	IL-105	86	87	16.3333	15.5	10.6667	10.5	92	92	121	112	116	116	271	265
37	IL-106	91	93	20	20	8.83333	8.5	94	93.5	62	53	120	122	213	208
38	Syn3	89	93	14.3333	14.5	8.66667	8.75	103	104	84	90	119	120	185	191
39	IL-115	92	93	15.3333	15.5	8.66667	8.75	82.6667	84	76	79	117	118	225	228
40	IL-119	90	91	19.3333	20	11.1667	11	93	94	76	67	119	122	185	176
41	IL-120	90	93	17.6667	17.5	10.5	10.25	82.3333	82.5	108	115	119	122	223	227
42	IL-123	92	93	16.6667	17.5	9.5	9.25	79.3333	80.5	73	65	123	123	175	167
43	IL-130	88	90	17	17	8.5	8.5	85	86	85	80	119	122	213	208
44	IL-131	88	90	16	17	7.5	7	83.6667	82	57	60	117	118	215	218
45	IL-134	89	90	17	16.5	8.83333	8.75	82.3333	82.5	112	120	118	121	237	243
46	Syn4	90	90	17.6667	18	8.83333	8.5	77.6667	77.5	32	65	116	115	350	383
47	IL-135	95	95	18.6667	18.5	10.5	10.25	83.3333	84	103	98	116	114	291	286
48	IL-136	91	92	18	18	9.16667	9.25	79.3333	81	75	54	116	115	139	118
49	IL-159	92	93	23	23	11.1667	11.5	92	90.5	67	52	123	125	187	172
50	IL-180	91	92	17.6667	18.5	9.33333	9.25	93.6667	93.5	79	90	117	119	225	236
51	IL-184	87	89	17.3333	17.5	10.8333	10.5	88	90	65	60	116	114	155	150
52	IL-185	90	92	18	18	10.8333	11	90.6667	92	123	137	116	115	203	217
53	IL-186	88	89	19.6667	20.5	9	9.25	83.3333	82.5	67	53	116	115	159	145
54	Syn5	88	90	19.3333	19.5	9.66667	9.75	74.6667	75	59	70	116	116	173	184
55	IL-212	87	89	20.6667	21.5	12	12	101	100	72	79	116	116	175	182
56	IL-226	92	93	20.6667	20.5	11.8333	12	103.333	103.5	64	50	122	123	267	253
57	IL-227	95	96	21.3333	21.5	13.3333	13	100	98.5	84	95	121	123	143	154
58	IL-248	89	90	17.6667	17.5	8.5	8.25	74.6667	74	66	80	116	115	81	95
59	IL-259	95	96	19.3333	19.5	10.5	10.5	97.3333	98.5	67	73	118	119	299	305
60	IL-279	88	91	16.6667	17.5	10.6667	11.5	95	93.5	38	46	116	115	107	117
61	IL-303	88	90	15.3333	15	7.33333	7.25	93	94.5	89	101	116	117	241	253
62	IL-308	88	90	19.3333	19	9.33333	9.75	92.3333	92.5	78	70	116	117	175	167
63	IL-355	92	93	15.6667	16	9.33333	9.25	85	84	69	75	118	120	95	101
64	IL-364	88	90	18	18	10.8333	10.25	92.3333	94.5	55	60	116	115	253	261
65	C1	96	99	20	20	8.83333	8.5	100.333	101	83	70	127	125	111	98
66	C2	89	91	18.6667	19	10.5	9.75	80.6667	79.5	99	90	123	122	187	178
67	C3	93	94	20	20.5	10.3333	10.5	83.3333	82.5	101	110	128	128	269	276
68	C4	95	97	20.6667	20.5	11	11.25	86.3333	86.5	48	56	123	125	147	155
69	C5	92	93	19.3333	19	9.33333	9	73.3333	73.5	86	69	122	120	189	172
70	C6	89	91	15	15.5	9	9	79.6667	77.5	79	92	121	120	217	230
71	PBW114	91	93	15.6667	16	6.5	6.25	74.6667	75.5	89	100	116	115	121	132
72	BWL3279	88	90	19.3333	18.5	10.6667	10.75	100.333	100	115	103	119	121	185	173
73	BWL4444	92	94	17	16.5	9	9.25	85	84.5	92	107	124	126	163	178
74	BWL3551	92	93	15.3333	16	8.66667	8.5	89.3333	88.5	79	75	118	121	192	188

## Sheet: Stage III (E5)
		Days to heading		Spiklet number		Spike length (cm)		PH		Tiller number		Maturity		Yield (grm)
Sl.No.	Genotype	R1	R2	R1	R2	R1	R2	R1	R2	R1	R2	R1	R2	R1	R2
1	Syn1	89	92	17.3333	19.5	10.5	10.75	52	49	39	34	113	118	94	86
2	IL-10	92	89	20.6667	20.5	9.83333	10	61	62.5	42	39	118	112	143	150
3	IL-11	89	87	22	21.5	11.5	9.75	92	61	52	51	111	113	116	128
4	IL-14	89	91	19.8333	21	20.1667	17	105.5	67	45	44	113	109	113	128
5	IL-15	92	92	18.65	18	11.65	12.25	111.65	83.5	49	44	115	118	142	122
6	IL-19	89	85	17	17	11.1667	11.25	71	73	63	70	114	106	94	81
7	IL-21	89	92	18.97	18	11.6367	12.75	86.97	76	79	91	119	118	110	78
8	IL-27	85	87	14.3333	15	8.66667	9.25	65	66.5	66	38	114	109	145	149
9	IL-29	79	79	15.6667	14.7	7.66667	6.7	61.6667	85.7	44	41	110	109	150	164
10	IL-30	86	87	17.6667	18	9	8.75	64.6667	61	64	65	107	110	159	150
11	IL-32	92	93	19.3333	20	7.66667	8.25	69	73	49	41	105	108	134	119
12	IL-35	91	91	18.6667	18.5	8.33333	8.25	65.6667	64.5	43	48	106	107	130	144
13	Syn2	84	84	17.3333	19.5	9	9	83	81.5	106	118	116	112	145	156
14	IL-39	91	90	16.6667	17.894	7.83333	7.394	72.3333	95.894	91	88	107	111	120	138
15	IL-40	90	90	18	17	7.73333	7.7	91.9	91.2	85	89	111	110	93	75
16	IL-41	85	84	18.3333	19	6.83333	6.75	58.3333	54.5	61	86	113	113	165	185
17	IL-42	87	87	20.3333	20	8	9	74.6667	76	41	41	110	112	109	128
18	IL-44	89	88	21	20.5	8.83333	9	63.6667	67	35	40	109	108	120	133
19	IL-45	92	89	17	18	7.83333	8	66.3333	68.5	54	56	112	111	144	128
20	IL-47	92	91	16.3333	16	9.66667	10	61.6667	60.5	54	62	107	110	130	125
21	IL-50	81	81	17.6667	16.5	7.66667	8	75.3333	72.5	83	71	108	106	125	136
22	IL-51	84	88	18.6667	19	9.66667	10.25	71.6667	72.5	59	37	108	108	150	120
23	IL-54	96	96	16.09	16.1	7.09	6.6	83.4233	82.1	38	45	108	108	128	115
24	IL-56	93	92	15.4233	15	6.59	5.75	84.09	83	94	91	103	105	86	105
25	IL-66	86	83	18	16.5	9.66667	9.5	68.6667	68	51	69	112	112	135	98
26	IL-68	93	89	18.3333	18.5	9	8.5	74.3333	72	51	65	120	117	153	118
27	IL-77	85	85	22.3333	22	13.1667	13.25	76	76.5	98	78	120	119	153	140
28	IL-79	85	87	23.3333	23	12.6667	12.25	75.3333	77	78	66	115	112	118	140
29	IL-80	87	85	17.3333	18	10.3333	10.25	77.6667	72.5	102	104	108	108	130	109
30	IL-87	84	87	18	18	11.1667	11.5	66	69	104	90	109	111	145	115
31	IL-91	86	86	23	22	11.6667	11.75	85.3333	81	78	103	113	115	142	135
32	IL-95	83	87	17	15	10.3333	10	77.3333	76.5	98	84	109	114	116	134
33	IL-98	89	89	17.6667	17	11.6667	11.75	82.3333	79.5	76	77	112	107	119	135
34	IL-102	84	81	21	21.5	9	8.25	85.6667	84	64	57	113	111	143	108
35	IL-103	81	78	17.3333	16	9.66667	10	72.6667	72	39	39	109	107	125	128
36	IL-105	84	86	18.6667	20.5	9.33333	9.75	80.3333	81	38	55	109	105	105	80
37	IL-106	89	93	23.3333	23	9.83333	10	68.3333	72	67	85	110	105	125	108
38	Syn3	89	89	15.6667	15	10.6667	10.75	79.3333	81	41	43	107	106	148	115
39	IL-115	89	89	20.6667	20	9.33333	9.5	50	47	41	36	105	105	136	115
40	IL-119	89	92	20.3333	18.5	7.83333	8.5	53	53	37	67	106	109	110	135
41	IL-120	91	89	20.3333	20.5	8.33333	8.25	64.6667	64	55	42	108	108	120	135
42	IL-123	91	91	17.6667	17	8.33333	8.25	71	74	52	40	108	106	107	129
43	IL-130	85	83	17.3333	16	6.16667	6.5	83.3333	83	39	51	107	111	126	131
44	IL-131	88	86	19	17.5	8.5	9	88	88.5	40	39	112	112	152	135
45	IL-134	84	88	19	19.5	8.5	8.25	79	77.5	39	43	111	110	132	110
46	Syn4	85	89	18.6667	18.5	8.16667	8.25	77.6667	78	68	59	109	108	142	134
47	IL-135	93	93	18.6667	18	9.16667	9.75	80	76	41	36	116	115	142	135
48	IL-136	90	90	18.6667	19	8.66667	8.25	70	70.5	60	81	113	111	107	140
49	IL-159	92	93	19.0233	19.7	8.02333	7.95	96.3567	95.2	42	59	117	117	130	113
50	IL-180	86	84	18	17	10.1667	10.75	78.6667	79	42	50	115	113	138	126
51	IL-184	84	85	20	19.5	12	12	81.3333	83.5	38	39	115	114	112	125
52	IL-185	84	84	18.3333	18	10.6667	10.5	64.3333	61.5	43	44	116	114	134	126
53	IL-186	87	87	19.6667	18	8.5	8.5	77.3333	76.5	45	43	111	115	128	114
54	Syn5	87	84	18	17.5	7.66667	8	74.6667	78.5	61	42	113	114	120	142
55	IL-212	81	79	21	21	10.8333	10.5	70.6667	72	43	35	115	111	126	117
56	IL-226	87	83	19	19	11.8333	11	83.6667	84.5	92	101	116	111	110	150
57	IL-227	82	82	19.6667	19	12	12.25	90	95.5	69	80	111	109	130	142
58	IL-248	80	82	18	18	9.16667	9.25	83.6667	83	48	35	107	108	103	120
59	IL-259	94	92	21.6667	21.5	13.1667	12.75	77.6667	76.5	41	46	117	120	170	155
60	IL-279	85	86	17.3333	16.5	12.8333	12	91.3333	93.5	84	81	114	112	105	140
61	IL-303	92	91	16	16	8.66667	9	85.6667	85.5	44	39	110	107	142	110
62	IL-308	91	92	16.3333	17	8.5	7.5	67.6667	68	42	40	115	113	125	134
63	IL-355	87	85	17	17.5	9	8.75	84.6667	85	98	86	114	114	130	115
64	IL-364	85	81	18.6667	17.5	9.66667	10	82.6667	93	46	51	109	108	140	125
65	C1	86	88	19.3333	20.5	10.8333	10.75	100.333	104	110	117	123	121	130	169
66	C2	83	85	8	7.5	11.6667	11.5	78	78	94	89	116	115	165	158
67	C3	86	88	18.6667	17	11.3333	11.75	76	76.5	41	65	120	121	133	172
68	C4	86	89	20.3333	20.5	10.3333	9.75	92.6667	94	70	81	117	121	171	175
69	C5	82	84	17	17.5	10.3333	10.25	80.3333	81	111	98	110	112	140	115
70	C6	84	86	17.6667	17	9.83333	10.25	84	84	73	65	117	115	191	168
71	PBW114	91	92	14	14	5	5.5	65	67	50	47	116	121	118	135
72	BWL3279	87	89	15.6667	15.5	9.5	9.75	57.6667	60.5	41	44	122	121	149	115
73	BWL4444	89	89	19.6667	21	8.66667	8.25	68.3333	69	75	77	115	115	145	120
74	BWL3551	85	89	23.3333	22	10	10.25	61.6667	60.5	35	39	115	118	156	150

## Sheet: Stage III (E6)
		Days to heading		Spiklet number		Spike length		PH		Tiller number		Maturity		Yield (grm)
Sl.No.	Genotype	R1	R2	R1	R2	R1	R2	R1	R2	R1	R2	R1	R2	R1	R2
1	Syn1	84	87	17.3333	17.5	9.83333	10	61.3333	61.5	45	39	107	106	72	78
2	IL-10	84	87	18.3333	17.5	9.16667	9	64.3333	64.5	48	41	106	105	104	110
3	IL-11	81	83	21	20.5	9.83333	9.5	62.3333	62	45	40	102	101	98	101
4	IL-14	84	87	18.6667	19.5	11.5	11.75	67.3333	66	45	35	102	100	93.6	86
5	IL-15	84	87	16.3333	16.5	11.3333	11.5	73.3333	73.5	43	38	104	106	102.05	115
6	IL-19	80	83	18.3333	18.5	11.3333	11	77.6667	79	39	36	102	99	67	78
7	IL-21	85	87	15.6667	15.5	8.83333	9	76.3333	77.5	60	52	110	112	75.4	68.5
8	IL-27	78	81	16.3333	16.5	8.33333	8.25	68.6667	71.5	65	58	103	103	110.5	115
9	IL-29	74	77	15	15.5	8	8	61.6667	60.5	36	40	98	98	121	114
10	IL-30	79	81	15.3333	15.5	7.83333	7.75	61	59.5	41	35	98	99	118.3	126
11	IL-32	85	87	18.6667	18.5	8	8.25	61	64	30	33	98	96	93.6	101
12	IL-35	85	87	18.3333	19	8.33333	8.25	56	56	40	35	98	98	104	98
13	Syn2	76	80	17.6667	18	9.33333	9.25	76	75	46	58	106	104	115.96	121
14	IL-39	83	85	17.6667	18.5	8.33333	8.25	65.3333	63	53	48	101	100	92.95	86
15	IL-40	83	85	17.6667	17	7.83333	7.75	61.6667	62.5	50	60	100	98	68	76.5
16	IL-41	79	80	18.6667	19.5	7.83333	7.75	64.3333	62	65	70	101	101	127.4	138
17	IL-42	80	82	18.3333	18	8.83333	9	66.6667	66.5	36	38	101	103	94.9	102
18	IL-44	81	83	17.3333	17	7.83333	8	62.3333	65	40	45	98	97	98.8	92
19	IL-45	85	87	15.6667	16	8.33333	8.5	69	70	59	55	100	102	105.95	115
20	IL-47	85	87	15.3333	15	8.16667	8.75	62.6667	61.5	62	53	98	98	101.4	106
21	IL-50	77	79	15.3333	15	7.66667	8.25	69.3333	69.5	50	40	101	99	98.8	88
22	IL-51	80	82	19	19.5	9.83333	10	69.3333	71	54	37	100	101	104	96
23	IL-54	88	90	17	16.5	9	9.75	61	61	41	34	98	99	93.6	85
24	IL-56	85	87	16.3333	15.5	8.83333	9	68.6667	67.5	40	35	97	96	76	88
25	IL-66	78	81	18.6667	18.5	9.5	9.5	61	61	38	52	103	101	87.75	82
26	IL-68	85	87	16.6667	17	7.66667	7.5	68	69	43	38	109	109	102.7	110
27	IL-77	81	83	21	21	12	12.25	76.3333	77	53	40	108	107	106.6	98
28	IL-79	81	83	17.6667	18	10.3333	10	74.3333	73.5	45	38	106	102	98.8	96
29	IL-80	81	83	16.6667	17.5	11.5	11.25	76.6667	76	52	43	101	100	94.25	106
30	IL-87	80	82	19	18.5	11.6667	12.5	72	74	63	55	101	101	101.4	95
31	IL-91	77	80	20	20.5	11.1667	11.25	81.3333	80	43	58	103	103	106.6	110
32	IL-95	79	81	15.6667	15.5	10.1667	9.75	71.6667	73.5	40	42	103	105	93.6	82
33	IL-98	81	83	17.6667	18	11.3333	11.5	76	76	38	35	101	101	96.85	85
34	IL-102	76	79	19.3333	19.5	8.66667	8.5	78.3333	77	55	42	101	100	92.3	78
35	IL-103	72	76	16	15	8.33333	8.5	60.3333	62	45	59	100	99	91	96
36	IL-105	81	82	16	17	9.33333	9.5	70.6667	72	45	47	98	98	75	89.5
37	IL-106	84	87	18.6667	18.5	7.66667	7.5	62.3333	64	45	60	98	97	92.3	105
38	Syn3	84	87	14	13.5	8.66667	9	72.3333	74	40	48	98	96	99.45	92
39	IL-115	84	87	18	17.5	8.66667	8.75	55.3333	54	37	43	98	99	96.2	82
40	IL-119	84	87	20	19.5	9.5	9.75	55.3333	55.5	35	48	98	98	91	106
41	IL-120	84	87	19	19	9.33333	9.25	56.6667	57.5	40	51	98	96	98.8	83
42	IL-123	84	87	16.3333	16	8.33333	8	57.6667	60	48	35	98	97	93.6	90
43	IL-130	79	81	16.3333	15.5	6.83333	6.75	66.3333	68	39	43	101	99	94.9	107
44	IL-131	77	82	16.3333	16	7.16667	7.25	66.3333	65.5	40	48	101	103	110	102
45	IL-134	80	82	16.6667	16.5	8	8	64.6667	65	39	47	99	99	92.3	83
46	Syn4	81	83	18	18	8.33333	8	65.3333	65.5	48	42	100	98	118	98
47	IL-135	84	87	17	16	8	8	64.3333	60	39	45	105	103	105.3	95
48	IL-136	81	85	16.3333	16.5	7.83333	7.75	62.3333	64	40	47	101	100	94.9	93
49	IL-159	84	88	17.6667	16.5	9	9	66	67	40	47	108	108	96.2	103
50	IL-180	80	82	17.3333	17.5	9.16667	9.25	82.6667	84	40	48	108	106	104	92
51	IL-184	77	80	17.3333	17	10.3333	9.75	74.3333	76	38	45	107	105	91	95
52	IL-185	80	82	17.3333	17.5	10.3333	10.25	74.3333	73.5	54	67	106	108	98.8	109
53	IL-186	80	82	19.3333	19	8.16667	8.5	70.6667	71.5	48	46	105	106	93.6	83
54	Syn5	78	82	19	19	8.33333	8.75	68	70.5	55	42	104	105	103	108
55	IL-212	75	77	18.6667	19	10.6667	10.25	74	75.5	48	44	104	104	98	106
56	IL-226	80	81	19.3333	19	10.6667	10.5	83	84.5	42	46	104	103	101.4	96
57	IL-227	79	80	19.3333	19	12	12.25	87.6667	90.5	51	66	102	101	98.8	88
58	IL-248	76	78	16.3333	16.5	8.5	8.5	71	71	45	56	100	102	87.75	93
59	IL-259	85	88	21.3333	21.5	11.8333	11.75	80	80	65	60	109	110	126	118
60	IL-279	76	80	15	15	10	10.25	82.6667	83.5	50	47	104	102	91	78
61	IL-303	84	87	15	15	7	7	77.6667	78.5	50	41	104	101	98.8	103
62	IL-308	84	87	17.3333	18	7.33333	7	65	66.5	48	46	104	104	94.9	110
63	IL-355	79	81	15.3333	16	8.5	8.25	78	79.5	52	60	102	104	93.6	98
64	IL-364	76	79	18.3333	17.5	10.1667	10.25	80.6667	82	43	48	100	99	101.4	108
65	C1	87	88	19.6667	20.5	10.6667	10.5	82.6667	83.5	58	62	112	113	110.5	116
66	C2	82	84	16.6667	16.5	8.66667	8.75	65	62.5	50	54	104	104	112	106
67	C3	82	84	20	18	10.3333	10.5	78.6667	78	60	47	111	112	115.44	120
68	C4	81	83	21.3333	21.5	10.3333	10.5	75.3333	78	40	47	110	110	123	118
69	C5	82	85	18.6667	18.5	8.16667	8.5	60.6667	58	52	48	102	102	84.5	78
70	C6	78	80	17	17	9.16667	9.25	78.3333	79.5	45	43	107	104	101.4	116
71	PBW114	83	86	13.6667	14	5.5	5.75	56	56.5	52	65	110	109	98.8	92
72	BWL3279	81	83	17	16.5	9.33333	9.75	62	63.5	54	58	111	111	104	106
73	BWL4444	84	87	20	20.5	9.66667	9.5	68.6667	69.5	49	53	103	104	102.05	96
74	BWL3551	81	83	17.3333	16.5	7.83333	7.75	64	61.5	38	43	106	107	109.85	103

[truncated: 2 more sheets: Stage III (E7), Stage III (E8)]
