# Supplementary material for: Stress adaptive plasticity from Aegilops tauschii introgression lines improves drought and heat stress tolerance in bread wheat (Triticum aestivum L.)
Source: PeerJ. 2024 Jun 11;12:e17528. doi: 10.7717/peerj.17528 (PMC11177856; doi:10.7717/peerj.17528)
Supplement: Supplemental Information 7 [file peerj-12-17528-s007.xlsx]

## Sheet: Sheet1
Table S1: List of germplasm lines (380 + 2 checks) used during stage-I
Sl.No.	Germplasm lines	Nature	Cross/Pedigree
1	PBW114	Durum wheat varieties	PBW114
2	PDW233		PDW233
3	BWL3279	Heat and drought-sensitive advanced breeding lines	BWL3279 (DBW17+Yr5)
4	BWL3551		BWL3551 (PBW343 Yr17+Yr70+Lr76)
5	BWL4444		BWL4444 (HD2967+Yr10)
6	Syn1	Amphiploids	PBW114-Ae. tauschii14102 amphiploid
7	Syn2		PBW114-Ae. tauschii14170 amphiploid
8	Syn3		PBW114-Ae. tauschii14128 amphiploid
9	Syn4		PBW114-Ae. tauschii14576 amphiploid
10	Syn5		PBW114-Ae. tauschii 3761 amphiploid
11	Syn6		PDW233*AT14135 amphiploid
C1	PBW725	Commercial check varieties	CHECK-1
C2	HD3086		CHECK-2
12	IL-1	Introgression lines	BC1F6 PBW114-Ae. tauschii 14102 amphiploid/BWL3279 (DBW17+Yr5)
13	IL-2	Introgression lines	BC1F6 PBW114-Ae. tauschii 14102 amphiploid/BWL3279 (DBW17+Yr5)
14	IL-3	Introgression lines	BC1F6 PBW114-Ae. tauschii 14102 amphiploid/BWL3279 (DBW17+Yr5)
15	IL-4	Introgression lines	BC1F6 PBW114-Ae. tauschii 14102 amphiploid/BWL3279 (DBW17+Yr5)
16	IL-5	Introgression lines	BC1F6 PBW114-Ae. tauschii 14102 amphiploid/BWL3279 (DBW17+Yr5)
17	IL-6	Introgression lines	BC1F6 PBW114-Ae. tauschii 14102 amphiploid/BWL3279 (DBW17+Yr5)
18	IL-7	Introgression lines	BC1F6 PBW114-Ae. tauschii 14102 amphiploid/BWL3279 (DBW17+Yr5)
19	IL-8	Introgression lines	BC1F6 PBW114-Ae. tauschii 14102 amphiploid/BWL3279 (DBW17+Yr5)
20	IL-9	Introgression lines	BC1F6 PBW114-Ae. tauschii 14102 amphiploid/BWL3279 (DBW17+Yr5)
21	IL-10	Introgression lines	BC1F6 PBW114-Ae. tauschii 14102 amphiploid/BWL3279 (DBW17+Yr5)
22	IL-11	Introgression lines	BC1F6 PBW114-Ae. tauschii 14102 amphiploid/BWL3279 (DBW17+Yr5)
23	IL-12	Introgression lines	BC1F6 PBW114-Ae. tauschii 14102 amphiploid/BWL3279 (DBW17+Yr5)
24	IL-13	Introgression lines	BC1F6 PBW114-Ae. tauschii 14102 amphiploid/BWL4444 (HD2967+Yr10)
25	IL-14	Introgression lines	BC1F6 PBW114-Ae. tauschii 14102 amphiploid/BWL4444 (HD2967+Yr10)
26	IL-15	Introgression lines	BC1F6 PBW114-Ae. tauschii 14102 amphiploid/BWL4444 (HD2967+Yr10)
27	IL-16	Introgression lines	BC1F6 PBW114-Ae. tauschii 14102 amphiploid/BWL4444 (HD2967+Yr10)
28	IL-17	Introgression lines	BC1F6 PBW114-Ae. tauschii 14102 amphiploid/BWL4444 (HD2967+Yr10)
29	IL-18	Introgression lines	BC1F6 PBW114-Ae. tauschii 14102 amphiploid/BWL4444 (HD2967+Yr10)
30	IL-19	Introgression lines	BC1F6 PBW114-Ae. tauschii 14102 amphiploid/BWL4444 (HD2967+Yr10)
31	IL-20	Introgression lines	BC1F6 PBW114-Ae. tauschii 14102 amphiploid/BWL4444 (HD2967+Yr10)
32	IL-21	Introgression lines	BC1F6 PBW114-Ae. tauschii 14102 amphiploid/BWL4444 (HD2967+Yr10)
33	IL-22	Introgression lines	BC1F6 PBW114-Ae. tauschii 14102 amphiploid/BWL4444 (HD2967+Yr10)
34	IL-23	Introgression lines	BC1F6 PBW114-Ae. tauschii 14102 amphiploid/BWL4444 (HD2967+Yr10)
35	IL-24	Introgression lines	BC1F6 PBW114-Ae. tauschii 14102 amphiploid/BWL4444 (HD2967+Yr10)
36	IL-25	Introgression lines	BC1F6 PBW114-Ae. tauschii 14102 amphiploid/BWL4444 (HD2967+Yr10)
37	IL-26	Introgression lines	BC1F6 PBW114-Ae. tauschii 14102 amphiploid/BWL4444 (HD2967+Yr10)
38	IL-27	Introgression lines	BC1F6 PBW114-Ae. tauschii 14102 amphiploid/BWL3531 (PBW343 Yr17+Yr70+Lr76)
39	IL-28	Introgression lines	BC1F6 PBW114-Ae. tauschii 14102 amphiploid/BWL3531 (PBW343 Yr17+Yr70+Lr76)
40	IL-29	Introgression lines	BC1F6 PBW114-Ae. tauschii 14102 amphiploid/BWL3531 (PBW343 Yr17+Yr70+Lr76)
41	IL-30	Introgression lines	BC1F6 PBW114-Ae. tauschii 14102 amphiploid/BWL3531 (PBW343 Yr17+Yr70+Lr76)
42	IL-31	Introgression lines	BC1F6 PBW114-Ae. tauschii 14102 amphiploid/BWL3531 (PBW343 Yr17+Yr70+Lr76)
43	IL-32	Introgression lines	BC1F6 PBW114-Ae. tauschii 14102 amphiploid/BWL3531 (PBW343 Yr17+Yr70+Lr76)
44	IL-33	Introgression lines	BC1F6 PBW114-Ae. tauschii 14102 amphiploid/BWL3531 (PBW343 Yr17+Yr70+Lr76)
45	IL-34	Introgression lines	BC1F6 PBW114-Ae. tauschii 14102 amphiploid/BWL3531 (PBW343 Yr17+Yr70+Lr76)
46	IL-35	Introgression lines	BC1F6 PBW114-Ae. tauschii 14102 amphiploid/BWL3531 (PBW343 Yr17+Yr70+Lr76)
47	IL-36	Introgression lines	BC1F6 PBW114-Ae. tauschii 14102 amphiploid/BWL3531 (PBW343 Yr17+Yr70+Lr76)
48	IL-37	Introgression lines	BC1F6 PBW114-Ae. tauschii 14102 amphiploid/BWL3531 (PBW343 Yr17+Yr70+Lr76)
49	IL-38	Introgression lines	BC1F6 PBW114-Ae. tauschii 14102 amphiploid/BWL3531 (PBW343 Yr17+Yr70+Lr76)
50	IL-39	Introgression lines	BC1F6 PBW114-Ae. tauschii 14170 amphiploid/BWL3279 (DBW17+Yr5)
51	IL-40	Introgression lines	BC1F6 PBW114-Ae. tauschii 14170 amphiploid/BWL3279 (DBW17+Yr5)
52	IL-41	Introgression lines	BC1F6 PBW114-Ae. tauschii 14170 amphiploid/BWL3279 (DBW17+Yr5)
53	IL-42	Introgression lines	BC1F6 PBW114-Ae. tauschii 14170 amphiploid/BWL3279 (DBW17+Yr5)
54	IL-43	Introgression lines	BC1F6 PBW114-Ae. tauschii 14170 amphiploid/BWL3279 (DBW17+Yr5)
55	IL-44	Introgression lines	BC1F6 PBW114-Ae. tauschii 14170 amphiploid/BWL3279 (DBW17+Yr5)
56	IL-45	Introgression lines	BC1F6 PBW114-Ae. tauschii 14170 amphiploid/BWL3279 (DBW17+Yr5)
57	IL-46	Introgression lines	BC1F6 PBW114-Ae. tauschii 14170 amphiploid/BWL3279 (DBW17+Yr5)
58	IL-47	Introgression lines	BC1F6 PBW114-Ae. tauschii 14170 amphiploid/BWL3279 (DBW17+Yr5)
59	IL-48	Introgression lines	BC1F6 PBW114-Ae. tauschii 14170 amphiploid/BWL3279 (DBW17+Yr5)
60	IL-49	Introgression lines	BC1F6 PBW114-Ae. tauschii 14170 amphiploid/BWL3279 (DBW17+Yr5)
61	IL-50	Introgression lines	BC1F6 PBW114-Ae. tauschii 14170 amphiploid/BWL3279 (DBW17+Yr5)
62	IL-51	Introgression lines	BC1F6 PBW114-Ae. tauschii 14170 amphiploid/BWL3279 (DBW17+Yr5)
63	IL-52	Introgression lines	BC1F6 PBW114-Ae. tauschii 14170 amphiploid/BWL3279 (DBW17+Yr5)
64	IL-53	Introgression lines	BC1F6 PBW114-Ae. tauschii 14170 amphiploid/BWL3279 (DBW17+Yr5)
65	IL-54	Introgression lines	BC1F6 PBW114-Ae. tauschii 14170 amphiploid/BWL3279 (DBW17+Yr5)
66	IL-55	Introgression lines	BC1F6 PBW114-Ae. tauschii 14170 amphiploid/BWL3279 (DBW17+Yr5)
67	IL-56	Introgression lines	BC1F6 PBW114-Ae. tauschii 14170 amphiploid/BWL3279 (DBW17+Yr5)
68	IL-57	Introgression lines	BC1F6 PBW114-Ae. tauschii 14170 amphiploid/BWL3279 (DBW17+Yr5)
69	IL-58	Introgression lines	BC1F6 PBW114-Ae. tauschii 14170 amphiploid/BWL3279 (DBW17+Yr5)
70	IL-59	Introgression lines	BC1F6 PBW114-Ae. tauschii 14170 amphiploid/BWL3279 (DBW17+Yr5)
71	IL-60	Introgression lines	BC1F6 PBW114-Ae. tauschii 14170 amphiploid/BWL3279 (DBW17+Yr5)
72	IL-61	Introgression lines	BC1F6 PBW114-Ae. tauschii 14170 amphiploid/BWL3279 (DBW17+Yr5)
73	IL-62	Introgression lines	BC1F6 PBW114-Ae. tauschii 14170 amphiploid/BWL3279 (DBW17+Yr5)
74	IL-63	Introgression lines	BC1F6 PBW114-Ae. tauschii 14170 amphiploid/BWL3279 (DBW17+Yr5)
75	IL-64	Introgression lines	BC1F6 PBW114-Ae. tauschii 14170 amphiploid/BWL3279 (DBW17+Yr5)
76	IL-65	Introgression lines	BC1F6 PBW114-Ae. tauschii 14170 amphiploid/BWL3279 (DBW17+Yr5)
77	IL-66	Introgression lines	BC1F6 PBW114-Ae. tauschii 14170 amphiploid/BWL3279 (DBW17+Yr5)
78	IL-67	Introgression lines	BC1F6 PBW114-Ae. tauschii 14170 amphiploid/BWL3279 (DBW17+Yr5)
79	IL-68	Introgression lines	BC1F6 PBW114-Ae. tauschii 14170 amphiploid/BWL3279 (DBW17+Yr5)
80	IL-69	Introgression lines	BC1F6 PBW114-Ae. tauschii 14170 amphiploid/BWL3279 (DBW17+Yr5)
81	IL-70	Introgression lines	BC1F6 PBW114-Ae. tauschii 14170 amphiploid/BWL3279 (DBW17+Yr5)
82	IL-71	Introgression lines	BC1F6 PBW114-Ae. tauschii 14170 amphiploid/BWL4444 (HD2967+Yr10)
83	IL-72	Introgression lines	BC1F6 PBW114-Ae. tauschii 14170 amphiploid/BWL4444 (HD2967+Yr10)
84	IL-73	Introgression lines	BC1F6 PBW114-Ae. tauschii 14170 amphiploid/BWL4444 (HD2967+Yr10)
85	IL-74	Introgression lines	BC1F6 PBW114-Ae. tauschii 14170 amphiploid/BWL4444 (HD2967+Yr10)
86	IL-75	Introgression lines	BC1F6 PBW114-Ae. tauschii 14170 amphiploid/BWL4444 (HD2967+Yr10)
87	IL-76	Introgression lines	BC1F6 PBW114-Ae. tauschii 14170 amphiploid/BWL4444 (HD2967+Yr10)
88	IL-77	Introgression lines	BC1F6 PBW114-Ae. tauschii 14170 amphiploid/BWL4444 (HD2967+Yr10)
89	IL-78	Introgression lines	BC1F6 PBW114-Ae. tauschii 14170 amphiploid/BWL4444 (HD2967+Yr10)
90	IL-79	Introgression lines	BC1F6 PBW114-Ae. tauschii 14170 amphiploid/BWL4444 (HD2967+Yr10)
91	IL-80	Introgression lines	BC1F6 PBW114-Ae. tauschii 14170 amphiploid/BWL4444 (HD2967+Yr10)
92	IL-81	Introgression lines	BC1F6 PBW114-Ae. tauschii 14170 amphiploid/BWL4444 (HD2967+Yr10)
93	IL-82	Introgression lines	BC1F6 PBW114-Ae. tauschii 14170 amphiploid/BWL4444 (HD2967+Yr10)
94	IL-83	Introgression lines	BC1F6 PBW114-Ae. tauschii 14170 amphiploid/BWL4444 (HD2967+Yr10)
95	IL-84	Introgression lines	BC1F6 PBW114-Ae. tauschii 14170 amphiploid/BWL4444 (HD2967+Yr10)
96	IL-85	Introgression lines	BC1F6 PBW114-Ae. tauschii 14170 amphiploid/BWL4444 (HD2967+Yr10)
97	IL-86	Introgression lines	BC1F6 PBW114-Ae. tauschii 14170 amphiploid/BWL4444 (HD2967+Yr10)
98	IL-87	Introgression lines	BC1F6 PBW114-Ae. tauschii 14170 amphiploid/BWL4444 (HD2967+Yr10)
99	IL-88	Introgression lines	BC1F6 PBW114-Ae. tauschii 14170 amphiploid/BWL4444 (HD2967+Yr10)
100	IL-89	Introgression lines	BC1F6 PBW114-Ae. tauschii 14170 amphiploid/BWL4444 (HD2967+Yr10)
101	IL-90	Introgression lines	BC1F6 PBW114-Ae. tauschii 14170 amphiploid/BWL4444 (HD2967+Yr10)
102	IL-91	Introgression lines	BC1F6 PBW114-Ae. tauschii 14170 amphiploid/BWL4444 (HD2967+Yr10)
103	IL-92	Introgression lines	BC1F6 PBW114-Ae. tauschii 14170 amphiploid/BWL4444 (HD2967+Yr10)
104	IL-93	Introgression lines	BC1F6 PBW114-Ae. tauschii 14170 amphiploid/BWL4444 (HD2967+Yr10)
105	IL-94	Introgression lines	BC1F6 PBW114-Ae. tauschii 14170 amphiploid/BWL4444 (HD2967+Yr10)
106	IL-95	Introgression lines	BC1F6 PBW114-Ae. tauschii 14170 amphiploid/BWL4444 (HD2967+Yr10)
107	IL-96	Introgression lines	BC1F6 PBW114-Ae. tauschii 14170 amphiploid/BWL4444 (HD2967+Yr10)
108	IL-97	Introgression lines	BC1F6 PBW114-Ae. tauschii 14170 amphiploid/BWL4444 (HD2967+Yr10)
109	IL-98	Introgression lines	BC1F6 PBW114-Ae. tauschii 14170 amphiploid/BWL4444 (HD2967+Yr10)
110	IL-99	Introgression lines	BC1F6 PBW114-Ae. tauschii 14170 amphiploid/BWL4444 (HD2967+Yr10)
111	IL-100	Introgression lines	BC1F6 PBW114-Ae. tauschii 14170 amphiploid/BWL3531 (PBW343 Yr17+Yr70+Lr76)
112	IL-101	Introgression lines	BC1F6 PBW114-Ae. tauschii 14170 amphiploid/BWL3531 (PBW343 Yr17+Yr70+Lr76)
113	IL-102	Introgression lines	BC1F6 PBW114-Ae. tauschii 14170 amphiploid/BWL3531 (PBW343 Yr17+Yr70+Lr76)
114	IL-103	Introgression lines	BC1F6 PBW114-Ae. tauschii 14170 amphiploid/BWL3531 (PBW343 Yr17+Yr70+Lr76)
115	IL-104	Introgression lines	BC1F6 PBW114-Ae. tauschii 14170 amphiploid/BWL3531 (PBW343 Yr17+Yr70+Lr76)
116	IL-105	Introgression lines	BC1F6 PBW114-Ae. tauschii 14170 amphiploid/BWL3531 (PBW343 Yr17+Yr70+Lr76)
117	IL-106	Introgression lines	BC1F6 PBW114-Ae. tauschii 14170 amphiploid/BWL3531 (PBW343 Yr17+Yr70+Lr76)
118	IL-107	Introgression lines	BC1F6 PBW114-Ae. tauschii 14170 amphiploid/BWL3531 (PBW343 Yr17+Yr70+Lr76)
119	IL-108	Introgression lines	BC1F6 PBW114-Ae. tauschii 14170 amphiploid/BWL3531 (PBW343 Yr17+Yr70+Lr76)
120	IL-109	Introgression lines	BC1F6 PBW114-Ae. tauschii 14170 amphiploid/BWL3531 (PBW343 Yr17+Yr70+Lr76)
121	IL-110	Introgression lines	BC1F6 PBW114-Ae. tauschii 14170 amphiploid/BWL3531 (PBW343 Yr17+Yr70+Lr76)
122	IL-111	Introgression lines	BC1F6 PBW114-Ae. tauschii 14128 amphiploid/BWL3279 (DBW17+Yr5)
123	IL-112	Introgression lines	BC1F6 PBW114-Ae. tauschii 14128 amphiploid/BWL3279 (DBW17+Yr5)
124	IL-113	Introgression lines	BC1F6 PBW114-Ae. tauschii 14128 amphiploid/BWL3279 (DBW17+Yr5)
125	IL-114	Introgression lines	BC1F6 PBW114-Ae. tauschii 14128 amphiploid/BWL3279 (DBW17+Yr5)
126	IL-115	Introgression lines	BC1F6 PBW114-Ae. tauschii 14128 amphiploid/BWL3279 (DBW17+Yr5)
127	IL-116	Introgression lines	BC1F6 PBW114-Ae. tauschii 14128 amphiploid/BWL3279 (DBW17+Yr5)
128	IL-117	Introgression lines	BC1F6 PBW114-Ae. tauschii 14128 amphiploid/BWL3279 (DBW17+Yr5)
129	IL-118	Introgression lines	BC1F6 PBW114-Ae. tauschii 14128 amphiploid/BWL3279 (DBW17+Yr5)
130	IL-119	Introgression lines	BC1F6 PBW114-Ae. tauschii 14128 amphiploid/BWL3279 (DBW17+Yr5)
131	IL-120	Introgression lines	BC1F6 PBW114-Ae. tauschii 14128 amphiploid/BWL3279 (DBW17+Yr5)
132	IL-121	Introgression lines	BC1F6 PBW114-Ae. tauschii 14128 amphiploid/BWL3279 (DBW17+Yr5)
133	IL-122	Introgression lines	BC1F6 PBW114-Ae. tauschii 14128 amphiploid/BWL3279 (DBW17+Yr5)
134	IL-123	Introgression lines	BC1F6 PBW114-Ae. tauschii 14128 amphiploid/BWL3279 (DBW17+Yr5)
135	IL-124	Introgression lines	BC1F6 PBW114-Ae. tauschii 3761 amphiploid/BWL3531 (PBW343 Yr17+Yr70+Lr76)
136	IL-125	Introgression lines	BC1F6 PBW114-Ae. tauschii 14128 amphiploid/BWL3531 (PBW343 Yr17+Yr70+Lr76)
137	IL-126	Introgression lines	BC1F6 PBW114-Ae. tauschii 14128 amphiploid/BWL3531 (PBW343 Yr17+Yr70+Lr76)
138	IL-127	Introgression lines	BC1F6 PBW114-Ae. tauschii 14128 amphiploid/BWL3531 (PBW343 Yr17+Yr70+Lr76)
139	IL-128	Introgression lines	BC1F6 PBW114-Ae. tauschii 14128 amphiploid/BWL3531 (PBW343 Yr17+Yr70+Lr76)
140	IL-129	Introgression lines	BC1F6 PBW114-Ae. tauschii 14128 amphiploid/BWL3531 (PBW343 Yr17+Yr70+Lr76)
141	IL-130	Introgression lines	BC1F6 PBW114-Ae. tauschii 14128 amphiploid/BWL3531 (PBW343 Yr17+Yr70+Lr76)
142	IL-131	Introgression lines	BC1F6 PBW114-Ae. tauschii 14128 amphiploid/BWL3531 (PBW343 Yr17+Yr70+Lr76)
143	IL-132	Introgression lines	BC1F6 PBW114-Ae. tauschii 14128 amphiploid/BWL3531 (PBW343 Yr17+Yr70+Lr76)
144	IL-133	Introgression lines	BC1F6 PBW114-Ae. tauschii 14128 amphiploid/BWL3531 (PBW343 Yr17+Yr70+Lr76)
145	IL-134	Introgression lines	BC1F6 PBW114-Ae. tauschii 14128 amphiploid/BWL3531 (PBW343 Yr17+Yr70+Lr76)
146	IL-135	Introgression lines	BC1F6 PBW114-Ae. tauschii 14576 amphiploid/BWL3279 (DBW17+Yr5)
147	IL-136	Introgression lines	BC1F6 PBW114-Ae. tauschii 14576 amphiploid/BWL3279 (DBW17+Yr5)
148	IL-137	Introgression lines	BC1F6 PBW114-Ae. tauschii 14576 amphiploid/BWL3279 (DBW17+Yr5)
149	IL-138	Introgression lines	BC1F6 PBW114-Ae. tauschii 14576 amphiploid/BWL3279 (DBW17+Yr5)
150	IL-139	Introgression lines	BC1F6 PBW114-Ae. tauschii 14576 amphiploid/BWL3279 (DBW17+Yr5)
151	IL-140	Introgression lines	BC1F6 PBW114-Ae. tauschii 14576 amphiploid/BWL3279 (DBW17+Yr5)
152	IL-141	Introgression lines	BC1F6 PBW114-Ae. tauschii 14576 amphiploid/BWL3279 (DBW17+Yr5)
153	IL-142	Introgression lines	BC1F6 PBW114-Ae. tauschii 14576 amphiploid/BWL3279 (DBW17+Yr5)
154	IL-143	Introgression lines	BC1F6 PBW114-Ae. tauschii 14576 amphiploid/BWL3279 (DBW17+Yr5)
155	IL-144	Introgression lines	BC1F6 PBW114-Ae. tauschii 14576 amphiploid/BWL3279 (DBW17+Yr5)
156	IL-145	Introgression lines	BC1F6 PBW114-Ae. tauschii 14576 amphiploid/BWL3279 (DBW17+Yr5)
157	IL-146	Introgression lines	BC1F6 PBW114-Ae. tauschii 14576 amphiploid/BWL3279 (DBW17+Yr5)
158	IL-147	Introgression lines	BC1F6 PBW114-Ae. tauschii 14576 amphiploid/BWL3279 (DBW17+Yr5)
159	IL-148	Introgression lines	BC1F6 PBW114-Ae. tauschii 14576 amphiploid/BWL3279 (DBW17+Yr5)
160	IL-149	Introgression lines	BC1F6 PBW114-Ae. tauschii 14576 amphiploid/BWL3279 (DBW17+Yr5)
161	IL-150	Introgression lines	BC1F6 PBW114-Ae. tauschii 14576 amphiploid/BWL3279 (DBW17+Yr5)
162	IL-151	Introgression lines	BC1F6 PBW114-Ae. tauschii 14576 amphiploid/BWL3279 (DBW17+Yr5)
163	IL-152	Introgression lines	BC1F6 PBW114-Ae. tauschii 14576 amphiploid/BWL3279 (DBW17+Yr5)
164	IL-153	Introgression lines	BC1F6 PBW114-Ae. tauschii 14576 amphiploid/BWL3279 (DBW17+Yr5)
165	IL-154	Introgression lines	BC1F6 PBW114-Ae. tauschii 14576 amphiploid/BWL3279 (DBW17+Yr5)
166	IL-155	Introgression lines	BC1F6 PBW114-Ae. tauschii 14576 amphiploid/BWL3279 (DBW17+Yr5)
167	IL-156	Introgression lines	BC1F6 PBW114-Ae. tauschii 14576 amphiploid/BWL3279 (DBW17+Yr5)
168	IL-157	Introgression lines	BC1F6 PBW114-Ae. tauschii 14576 amphiploid/BWL3279 (DBW17+Yr5)
169	IL-158	Introgression lines	BC1F6 PBW114-Ae. tauschii 14576 amphiploid/BWL3279 (DBW17+Yr5)
170	IL-159	Introgression lines	BC1F6 PBW114-Ae. tauschii 14576 amphiploid/BWL3279 (DBW17+Yr5)
171	IL-160	Introgression lines	BC1F6 PBW114-Ae. tauschii 14576 amphiploid/BWL3279 (DBW17+Yr5)
172	IL-161	Introgression lines	BC1F6 PBW114-Ae. tauschii 14576 amphiploid/BWL3279 (DBW17+Yr5)
173	IL-162	Introgression lines	BC1F6 PBW114-Ae. tauschii 14576 amphiploid/BWL3279 (DBW17+Yr5)
174	IL-163	Introgression lines	BC1F6 PBW114-Ae. tauschii 14576 amphiploid/BWL3279 (DBW17+Yr5)
175	IL-164	Introgression lines	BC1F6 PBW114-Ae. tauschii 14576 amphiploid/BWL3279 (DBW17+Yr5)
176	IL-165	Introgression lines	BC1F6 PBW114-Ae. tauschii 14576 amphiploid/BWL3279 (DBW17+Yr5)
177	IL-166	Introgression lines	BC1F6 PBW114-Ae. tauschii 14576 amphiploid/BWL3531 (PBW343 Yr17+Yr70+Lr76)
178	IL-167	Introgression lines	BC1F6 PBW114-Ae. tauschii 14576 amphiploid/BWL3531 (PBW343 Yr17+Yr70+Lr76)
179	IL-168	Introgression lines	BC1F6 PBW114-Ae. tauschii 14576 amphiploid/BWL3531 (PBW343 Yr17+Yr70+Lr76)
180	IL-169	Introgression lines	BC1F6 PBW114-Ae. tauschii 14576 amphiploid/BWL3531 (PBW343 Yr17+Yr70+Lr76)
181	IL-170	Introgression lines	BC1F6 PBW114-Ae. tauschii 14576 amphiploid/BWL3531 (PBW343 Yr17+Yr70+Lr76)
182	IL-171	Introgression lines	BC1F6 PBW114-Ae. tauschii 14576 amphiploid/BWL3531 (PBW343 Yr17+Yr70+Lr76)
183	IL-172	Introgression lines	BC1F6 PBW114-Ae. tauschii 14576 amphiploid/BWL3531 (PBW343 Yr17+Yr70+Lr76)
184	IL-173	Introgression lines	BC1F6 PBW114-Ae. tauschii 14576 amphiploid/BWL3531 (PBW343 Yr17+Yr70+Lr76)
185	IL-174	Introgression lines	BC1F6 PBW114-Ae. tauschii 14576 amphiploid/BWL3531 (PBW343 Yr17+Yr70+Lr76)
186	IL-175	Introgression lines	BC1F6 PBW114-Ae. tauschii 14576 amphiploid/BWL3531 (PBW343 Yr17+Yr70+Lr76)
187	IL-176	Introgression lines	BC1F6 PBW114-Ae. tauschii 14576 amphiploid/BWL3531 (PBW343 Yr17+Yr70+Lr76)
188	IL-177	Introgression lines	BC1F6 PBW114-Ae. tauschii 14576 amphiploid/BWL3531 (PBW343 Yr17+Yr70+Lr76)
189	IL-178	Introgression lines	BC1F6 PBW114-Ae. tauschii 14576 amphiploid/BWL3531 (PBW343 Yr17+Yr70+Lr76)
190	IL-179	Introgression lines	BC1F6 PBW114-Ae. tauschii 14576 amphiploid/BWL3531 (PBW343 Yr17+Yr70+Lr76)
191	IL-180	Introgression lines	BC1F6 PBW114-Ae. tauschii 14576 amphiploid/BWL3531 (PBW343 Yr17+Yr70+Lr76)
192	IL-181	Introgression lines	BC1F6 PBW114-Ae. tauschii 14576 amphiploid/BWL3531 (PBW343 Yr17+Yr70+Lr76)
193	IL-182	Introgression lines	BC1F6 PBW114-Ae. tauschii 14576 amphiploid/BWL3531 (PBW343 Yr17+Yr70+Lr76)
194	IL-183	Introgression lines	BC1F6 PBW114-Ae. tauschii 14576 amphiploid/BWL3531 (PBW343 Yr17+Yr70+Lr76)
195	IL-184	Introgression lines	BC1F6 PBW114-Ae. tauschii 14576 amphiploid/BWL3531 (PBW343 Yr17+Yr70+Lr76)
196	IL-185	Introgression lines	BC1F6 PBW114-Ae. tauschii 14576 amphiploid/BWL3531 (PBW343 Yr17+Yr70+Lr76)
197	IL-186	Introgression lines	BC1F6 PBW114-Ae. tauschii 14576 amphiploid/BWL3531 (PBW343 Yr17+Yr70+Lr76)
198	IL-187	Introgression lines	BC1F6 PBW114-Ae. tauschii 14576 amphiploid/BWL3531 (PBW343 Yr17+Yr70+Lr76)
199	IL-188	Introgression lines	BC1F6 PBW114-Ae. tauschii 14576 amphiploid/BWL3531 (PBW343 Yr17+Yr70+Lr76)
200	IL-189	Introgression lines	BC1F6 PBW114-Ae. tauschii 14576 amphiploid/BWL3531 (PBW343 Yr17+Yr70+Lr76)
201	IL-190	Introgression lines	BC1F6 PBW114-Ae. tauschii 14576 amphiploid/BWL3531 (PBW343 Yr17+Yr70+Lr76)
202	IL-191	Introgression lines	BC1F6 PBW114-Ae. tauschii 14576 amphiploid/BWL3531 (PBW343 Yr17+Yr70+Lr76)
203	IL-192	Introgression lines	BC1F6 PBW114-Ae. tauschii 14576 amphiploid/BWL3531 (PBW343 Yr17+Yr70+Lr76)
204	IL-193	Introgression lines	BC1F6 PBW114-Ae. tauschii 14576 amphiploid/BWL3531 (PBW343 Yr17+Yr70+Lr76)
205	IL-194	Introgression lines	BC1F6 PBW114-Ae. tauschii 14576 amphiploid/BWL3531 (PBW343 Yr17+Yr70+Lr76)
206	IL-195	Introgression lines	BC1F6 PBW114-Ae. tauschii 14576 amphiploid/BWL3531 (PBW343 Yr17+Yr70+Lr76)
207	IL-196	Introgression lines	BC1F6 PBW114-Ae. tauschii 14576 amphiploid/BWL3531 (PBW343 Yr17+Yr70+Lr76)
208	IL-197	Introgression lines	BC1F6 PBW114-Ae. tauschii 14576 amphiploid/BWL3531 (PBW343 Yr17+Yr70+Lr76)
209	IL-198	Introgression lines	BC1F6 PBW114-Ae. tauschii 14576 amphiploid/BWL3531 (PBW343 Yr17+Yr70+Lr76)
210	IL-199	Introgression lines	BC1F6 PBW114-Ae. tauschii 14576 amphiploid/BWL3531 (PBW343 Yr17+Yr70+Lr76)
211	IL-200	Introgression lines	BC1F6 PBW114-Ae. tauschii 14576 amphiploid/BWL3531 (PBW343 Yr17+Yr70+Lr76)
212	IL-201	Introgression lines	BC1F6 PBW114-Ae. tauschii 14576 amphiploid/BWL3531 (PBW343 Yr17+Yr70+Lr76)
213	IL-202	Introgression lines	BC1F6 PBW114-Ae. tauschii 3761 amphiploid/BWL4444 (HD2967+Yr10)
214	IL-203	Introgression lines	BC1F6 PBW114-Ae. tauschii 3761 amphiploid/BWL4444 (HD2967+Yr10)
215	IL-204	Introgression lines	BC1F6 PBW114-Ae. tauschii 3761 amphiploid/BWL4444 (HD2967+Yr10)
216	IL-205	Introgression lines	BC1F6 PBW114-Ae. tauschii 3761 amphiploid/BWL4444 (HD2967+Yr10)
217	IL-206	Introgression lines	BC1F6 PBW114-Ae. tauschii 3761 amphiploid/BWL4444 (HD2967+Yr10)
218	IL-207	Introgression lines	BC1F6 PBW114-Ae. tauschii 3761 amphiploid/BWL4444 (HD2967+Yr10)
219	IL-208	Introgression lines	BC1F6 PBW114-Ae. tauschii 3761 amphiploid/BWL4444 (HD2967+Yr10)
220	IL-209	Introgression lines	BC1F6 PBW114-Ae. tauschii 3761 amphiploid/BWL4444 (HD2967+Yr10)
221	IL-210	Introgression lines	BC1F6 PBW114-Ae. tauschii 3761 amphiploid/BWL4444 (HD2967+Yr10)
222	IL-211	Introgression lines	BC1F6 PBW114-Ae. tauschii 3761 amphiploid/BWL4444 (HD2967+Yr10)
223	IL-212	Introgression lines	BC1F6 PBW114-Ae. tauschii 3761 amphiploid/BWL4444 (HD2967+Yr10)
224	IL-213	Introgression lines	BC1F6 PBW114-Ae. tauschii 3761 amphiploid/BWL4444 (HD2967+Yr10)
225	IL-214	Introgression lines	BC1F6 PBW114-Ae. tauschii 3761 amphiploid/BWL4444 (HD2967+Yr10)
226	IL-215	Introgression lines	BC1F6 PBW114-Ae. tauschii 3761 amphiploid/BWL4444 (HD2967+Yr10)
227	IL-216	Introgression lines	BC1F6 PBW114-Ae. tauschii 3761 amphiploid/BWL4444 (HD2967+Yr10)
228	IL-217	Introgression lines	BC1F6 PBW114-Ae. tauschii 3761 amphiploid/BWL4444 (HD2967+Yr10)
229	IL-218	Introgression lines	BC1F6 PBW114-Ae. tauschii 3761 amphiploid/BWL4444 (HD2967+Yr10)
230	IL-219	Introgression lines	BC1F6 PBW114-Ae. tauschii 3761 amphiploid/BWL4444 (HD2967+Yr10)
231	IL-220	Introgression lines	BC1F6 PBW114-Ae. tauschii 3761 amphiploid/BWL4444 (HD2967+Yr10)
232	IL-221	Introgression lines	BC1F6 PBW114-Ae. tauschii 3761 amphiploid/BWL4444 (HD2967+Yr10)
233	IL-222	Introgression lines	BC1F6 PBW114-Ae. tauschii 3761 amphiploid/BWL4444 (HD2967+Yr10)
234	IL-223	Introgression lines	BC1F6 PBW114-Ae. tauschii 3761 amphiploid/BWL4444 (HD2967+Yr10)
235	IL-224	Introgression lines	BC1F6 PBW114-Ae. tauschii 3761 amphiploid/BWL4444 (HD2967+Yr10)
236	IL-225	Introgression lines	BC1F6 PBW114-Ae. tauschii 3761 amphiploid/BWL4444 (HD2967+Yr10)
237	IL-226	Introgression lines	BC1F6 PBW114-Ae. tauschii 3761 amphiploid/BWL4444 (HD2967+Yr10)
238	IL-227	Introgression lines	BC1F6 PBW114-Ae. tauschii 3761 amphiploid/BWL4444 (HD2967+Yr10)
239	IL-228	Introgression lines	BC1F6 PBW114-Ae. tauschii 3761 amphiploid/BWL4444 (HD2967+Yr10)
240	IL-229	Introgression lines	BC1F6 PBW114-Ae. tauschii 3761 amphiploid/BWL4444 (HD2967+Yr10)
241	IL-230	Introgression lines	BC1F6 PBW114-Ae. tauschii 3761 amphiploid/BWL4444 (HD2967+Yr10)
242	IL-231	Introgression lines	BC1F6 PBW114-Ae. tauschii 3761 amphiploid/BWL4444 (HD2967+Yr10)
243	IL-232	Introgression lines	BC1F6 PBW114-Ae. tauschii 3761 amphiploid/BWL4444 (HD2967+Yr10)
244	IL-233	Introgression lines	BC1F6 PBW114-Ae. tauschii 3761 amphiploid/BWL4444 (HD2967+Yr10)
245	IL-234	Introgression lines	BC1F6 PBW114-Ae. tauschii 3761 amphiploid/BWL4444 (HD2967+Yr10)
246	IL-235	Introgression lines	BC1F6 PBW114-Ae. tauschii 3761 amphiploid/BWL4444 (HD2967+Yr10)
247	IL-236	Introgression lines	BC1F6 PBW114-Ae. tauschii 3761 amphiploid/BWL4444 (HD2967+Yr10)
248	IL-237	Introgression lines	BC1F6 PBW114-Ae. tauschii 3761 amphiploid/BWL3531 (PBW343 Yr17+Yr70+Lr76)
249	IL-238	Introgression lines	BC1F6 PBW114-Ae. tauschii 3761 amphiploid/BWL3531 (PBW343 Yr17+Yr70+Lr76)
250	IL-239	Introgression lines	BC1F6 PBW114-Ae. tauschii 3761 amphiploid/BWL3531 (PBW343 Yr17+Yr70+Lr76)
251	IL-240	Introgression lines	BC1F6 PBW114-Ae. tauschii 3761 amphiploid/BWL3531 (PBW343 Yr17+Yr70+Lr76)
252	IL-241	Introgression lines	BC1F6 PBW114-Ae. tauschii 3761 amphiploid/BWL3531 (PBW343 Yr17+Yr70+Lr76)
253	IL-242	Introgression lines	BC1F6 PBW114-Ae. tauschii 3761 amphiploid/BWL3531 (PBW343 Yr17+Yr70+Lr76)
254	IL-243	Introgression lines	BC1F6 PBW114-Ae. tauschii 3761 amphiploid/BWL3531 (PBW343 Yr17+Yr70+Lr76)
255	IL-244	Introgression lines	BC1F6 PBW114-Ae. tauschii 3761 amphiploid/BWL3531 (PBW343 Yr17+Yr70+Lr76)
256	IL-245	Introgression lines	BC1F6 PBW114-Ae. tauschii 3761 amphiploid/BWL3531 (PBW343 Yr17+Yr70+Lr76)
257	IL-246	Introgression lines	BC1F6 PBW114-Ae. tauschii 3761 amphiploid/BWL3531 (PBW343 Yr17+Yr70+Lr76)
258	IL-247	Introgression lines	BC1F6 PBW114-Ae. tauschii 3761 amphiploid/BWL3531 (PBW343 Yr17+Yr70+Lr76)
259	IL-248	Introgression lines	BC1F6 PBW114-Ae. tauschii 3761 amphiploid/BWL3531 (PBW343 Yr17+Yr70+Lr76)
260	IL-249	Introgression lines	BC1F6 PBW114-Ae. tauschii 3761 amphiploid/BWL3531 (PBW343 Yr17+Yr70+Lr76)
261	IL-250	Introgression lines	BC1F6 PBW114-Ae. tauschii 3761 amphiploid/BWL3531 (PBW343 Yr17+Yr70+Lr76)
262	IL-251	Introgression lines	BC1F6 PBW114-Ae. tauschii 3761 amphiploid/BWL3531 (PBW343 Yr17+Yr70+Lr76)
263	IL-252	Introgression lines	BC1F6 PBW114-Ae. tauschii 3761 amphiploid/BWL3531 (PBW343 Yr17+Yr70+Lr76)
264	IL-253	Introgression lines	BC1F6 PBW114-Ae. tauschii 3761 amphiploid/BWL3531 (PBW343 Yr17+Yr70+Lr76)
265	IL-254	Introgression lines	BC1F6 PBW114-Ae. tauschii 3761 amphiploid/BWL3531 (PBW343 Yr17+Yr70+Lr76)
266	IL-255	Introgression lines	BC1F6 PBW114-Ae. tauschii 3761 amphiploid/BWL3531 (PBW343 Yr17+Yr70+Lr76)
267	IL-256	Introgression lines	BC1F7 PBW114*AT14128/BWL3531
268	IL-257	Introgression lines	BC1F7 PBW114*AT14128/BWL3531
269	IL-258	Introgression lines	BC1F7 PBW114*AT14128/BWL3531
270	IL-259	Introgression lines	BC1F7 PBW114*AT14128/BWL3531
271	IL-260	Introgression lines	BC1F7 PBW114*AT14128/BWL3531
272	IL-261	Introgression lines	BC1F7 PBW114*AT14128/BWL3531
273	IL-262	Introgression lines	BC1F6 PBW114*AT14128/BWL4444
274	IL-263	Introgression lines	BC1F7 PBW114*AT14128/BWL3531
275	IL-264	Introgression lines	BC1F7 PBW114*AT14128/BWL3531
276	IL-265	Introgression lines	BC1F7 PBW114*AT14128/BWL3531
277	IL-266	Introgression lines	BC1F7 PBW114*AT14128/BWL3531
278	IL-267	Introgression lines	BC1F7 PBW114*AT14128/BWL3531
279	IL-268	Introgression lines	BC1F7 PBW114*AT14128/BWL3531
280	IL-269	Introgression lines	BC1F7 PBW114*AT14128/BWL3531
281	IL-270	Introgression lines	BC1F6 PBW114*AT14128/BWL4444
282	IL-271	Introgression lines	BC1F7 PBW114*AT14128/BWL3531
283	IL-272	Introgression lines	BC1F7 PBW114*AT14128/BWL3531
284	IL-273	Introgression lines	BC1F7 PBW114*AT14128/BWL3531
285	IL-274	Introgression lines	BC1F6 PBW114*AT14128/BWL4444
286	IL-275	Introgression lines	BC1F6 PBW114*AT14128/BWL4444
287	IL-276	Introgression lines	BC1F7 PBW114*AT14128/BWL3531
288	IL-277	Introgression lines	BC1F7 PBW114*AT14128/BWL3531
289	IL-278	Introgression lines	BC1F7 PBW114*AT14128/BWL3531
290	IL-279	Introgression lines	BC1F6 PBW114*AT14128/BWL4444
291	IL-280	Introgression lines	BC1F6 PBW114*AT14128/BWL4444
292	IL-281	Introgression lines	BC1F7 PBW114*AT14128/BWL3531
293	IL-282	Introgression lines	BC1F7 PBW114*AT14128/BWL3531
294	IL-283	Introgression lines	BC1F7 PBW114*AT14128/BWL3531
295	IL-284	Introgression lines	BC1F7 PBW114*AT14128/BWL3531
296	IL-285	Introgression lines	BC1F6 PBW114*AT14128/BWL4444
297	IL-286	Introgression lines	BC1F7 PBW114*AT14128/BWL3531
298	IL-287	Introgression lines	BC1F7 PBW114*AT14128/BWL3531
299	IL-288	Introgression lines	BC1F6 PBW114*AT14128/BWL4444
300	IL-289	Introgression lines	BC1F7 PBW114*AT14128/BWL3531
301	IL-290	Introgression lines	BC1F7 PBW114*AT14128/BWL3531
302	IL-291	Introgression lines	BC1F7 PBW114*AT14128/BWL3531
303	IL-292	Introgression lines	BC1F7 PBW114*AT14128/BWL3531
304	IL-293	Introgression lines	BC1F6 PBW114*AT14128/BWL4444
305	IL-294	Introgression lines	BC1F7 PBW114*AT14128/BWL3531
306	IL-295	Introgression lines	BC1F6 PBW114*AT14128/BWL4444
307	IL-296	Introgression lines	BC1F7 PBW114*AT14128/BWL3531
308	IL-297	Introgression lines	BC1F7 PBW114*AT14128/BWL3531
309	IL-298	Introgression lines	BC1F6 PBW114*AT14128/BWL4444
310	IL-299	Introgression lines	BC1F7 PBW114*AT14128/BWL3531
311	IL-300	Introgression lines	BC1F7 PBW114*AT14128/BWL3531
312	IL-301	Introgression lines	BC1F7 PBW114*AT14128/BWL3531
313	IL-302	Introgression lines	BC1F6 PBW114*AT14128/BWL4444
314	IL-303	Introgression lines	BC1F7 PBW114*AT14128/BWL3531
315	IL-304	Introgression lines	BC1F7 PBW114*AT14128/BWL3531
316	IL-305	Introgression lines	BC1F7 PBW114*AT14128/BWL3531
317	IL-306	Introgression lines	BC1F6 PBW114*AT14128/BWL4444
318	IL-307	Introgression lines	BC1F7 PBW114*AT14128/BWL3531
319	IL-308	Introgression lines	BC1F7 PBW114*AT14128/BWL3531
320	IL-309	Introgression lines	BC1F7 PBW114*AT14128/BWL3531
321	IL-310	Introgression lines	BC1F7 PBW114*AT14128/BWL3531
322	IL-311	Introgression lines	BC1F7 PBW114*AT14128/BWL3531
323	IL-312	Introgression lines	BC1F7 PBW114*AT14128/BWL3531
324	IL-313	Introgression lines	BC1F7 PBW114*AT14128/BWL3531
325	IL-314	Introgression lines	BC1F6 PBW114*AT14128/BWL4444
326	IL-315	Introgression lines	BC1F7 PBW114*AT14128/BWL3531
327	IL-316	Introgression lines	BC1F6 PDW233*AT14135/BWL3531
328	IL-317	Introgression lines	BC1F6 PDW233*AT14135/BWL4444
329	IL-318	Introgression lines	BC1F6 PDW233*AT14135/BWL3531
330	IL-319	Introgression lines	BC1F6 PDW233*AT14135/BWL3531
331	IL-320	Introgression lines	BC1F6 PDW233*AT14135/BWL4444
332	IL-321	Introgression lines	BC1F6 PDW233*AT14135/BWL3531
333	IL-322	Introgression lines	BC1F6 PDW233*AT14135/BWL3531
334	IL-323	Introgression lines	BC1F6 PDW233*AT14135/BWL4444
335	IL-324	Introgression lines	BC1F6 PDW233*AT14135/BWL3531
336	IL-325	Introgression lines	BC1F6 PDW233-AT14135/BWL4444
337	IL-326	Introgression lines	BC1F6 PDW233*AT14135/BWL4444
338	IL-327	Introgression lines	BC1F6 PDW233*AT14135/BWL4444
339	IL-328	Introgression lines	BC1F6 PDW233*AT14135/BWL3531
340	IL-329	Introgression lines	BC1F6 PDW233*AT14135/BWL3531
341	IL-330	Introgression lines	BC1F6 PDW233*AT14135/BWL4444
342	IL-331	Introgression lines	BC1F6 PDW233*AT14135/BWL3531
343	IL-332	Introgression lines	BC1F6 PDW233*AT14135/BWL3531
344	IL-333	Introgression lines	BC1F6 PDW233*AT14135/BWL3531
345	IL-334	Introgression lines	BC1F6 PDW233*AT14135/BWL4444
346	IL-335	Introgression lines	BC1F6 PDW233*AT14135/BWL4444
347	IL-336	Introgression lines	BC1F6 PDW233*AT14135/BWL4444
348	IL-337	Introgression lines	BC1F6 PDW233*AT14135/BWL4444
349	IL-338	Introgression lines	BC1F6 PDW233*AT14135/BWL4444
350	IL-339	Introgression lines	BC1F6 PDW233*AT14135/BWL4444
351	IL-340	Introgression lines	BC1F6 PDW233*AT14135/BWL3531
352	IL-341	Introgression lines	BC1F6 PDW233*AT14135/BWL4444
353	IL-342	Introgression lines	BC1F6 PDW233*AT14135/BWL3531
354	IL-343	Introgression lines	BC1F7 PBW114*AT14170/BWL3531
355	IL-344	Introgression lines	BC1F7 PBW114*AT14170/BWL4444
356	IL-345	Introgression lines	BC1F7 PBW114*AT14170/BWL3531
357	IL-346	Introgression lines	BC1F7 PBW114*AT14170/BWL4444
358	IL-347	Introgression lines	BC1F7 PBW114*AT14170/BWL3531
359	IL-348	Introgression lines	BC1F7 PBW114*AT14170/BWL4444
360	IL-349	Introgression lines	BC1F7 PBW114*AT14170/BWL3531
361	IL-350	Introgression lines	BC1F7 PBW114*AT14170/BWL3531
362	IL-351	Introgression lines	BC1F7 PBW114*AT14170/BWL4444
363	IL-352	Introgression lines	BC1F7 PBW114*AT14170/BWL4444
364	IL-353	Introgression lines	BC1F7 PBW114*AT14170/BWL3531
365	IL-354	Introgression lines	BC1F7 PBW114*AT14170/BWL4444
366	IL-355	Introgression lines	BC1F7 PBW114*AT14170/BWL3531
367	IL-356	Introgression lines	BC1F7 PBW114*AT14170/BWL4444
368	IL-357	Introgression lines	BC1F7 PBW114*AT14170/BWL4444
369	IL-358	Introgression lines	BC1F7 PBW114*AT14170/BWL4444
370	IL-359	Introgression lines	BC1F7 PBW114*AT14170/BWL4444
371	IL-360	Introgression lines	BC1F7 PBW114*AT14170/BWL4444
372	IL-361	Introgression lines	BC1F7 PBW114*AT14170/BWL3531
373	IL-362	Introgression lines	BC1F7 PBW114*AT14170/BWL4444
374	IL-363	Introgression lines	BC1F7 PBW114*AT14170/BWL3531
375	IL-364	Introgression lines	BC1F7 PBW114*AT14170/BWL3531
376	IL-365	Introgression lines	BC1F7 PBW114*AT14170/BWL4444
377	IL-366	Introgression lines	BC1F7 PBW114*AT14170/BWL4444
378	IL-367	Introgression lines	BC1F7 PBW114*AT14170/BWL3531
379	IL-368	Introgression lines	BC1F7 PBW114*AT14170/BWL4444
380	IL-369	Introgression lines	BC1F7 PBW114*AT14170/BWL3531
