# Supplementary material for: Stress adaptive plasticity from Aegilops tauschii introgression lines improves drought and heat stress tolerance in bread wheat (Triticum aestivum L.)
Source: PeerJ. 2024 Jun 11;12:e17528. doi: 10.7717/peerj.17528 (PMC11177856; doi:10.7717/peerj.17528)
Supplement: Supplemental Information 8 [file peerj-12-17528-s008.xlsx]

## Sheet: Sheet1
Table S2: List of germplasm lines (including 59 selected Aegilops tauschii derived introgression lines) used during stage-II and stage-III for evaluation under heat and drought stress tolerance
Sl.No.	Germplasm lines	Nature	Cross/Pedigree
1	PBW114	Durum wheat varieties	PBW114
2	BWL3279	Heat and drought-sensitive advanced breeding lines	BWL3279 (DBW17+Yr5)
3	BWL3551		BWL3551 (PBW343 Yr17+Yr70+Lr76)
4	BWL4444		BWL4444 (HD2967+Yr10)
5	Syn1	Amphiploids	PBW114-Ae. tauschii14102 amphiploid
6	Syn2		PBW114-Ae. tauschii14170 amphiploid
7	Syn3		PBW114-Ae. tauschii14128 amphiploid
8	Syn4		PBW114-Ae. tauschii14576 amphiploid
9	Syn5		PBW114-Ae. tauschii 3761 amphiploid
C1	PBW725	Commercial check varieties	-
C2	HD3086		-
C3	PBW343	Heat tolerant	-
C4	PBW660	Draught tolerant	-
C5	C-306	heat and drought tolerant	-
C6	Raj-3765		-
10	IL-10	Introgression lines	BC1F6 PBW114-Ae. tauschii 14102 amphiploid/BWL3279 (DBW17+Yr5)
11	IL-11	Introgression lines	BC1F6 PBW114-Ae. tauschii 14102 amphiploid/BWL3279 (DBW17+Yr5)
12	IL-14	Introgression lines	BC1F6 PBW114-Ae. tauschii 14102 amphiploid/BWL4444 (HD2967+Yr10)
13	IL-15	Introgression lines	BC1F6 PBW114-Ae. tauschii 14102 amphiploid/BWL4444 (HD2967+Yr10)
14	IL-19	Introgression lines	BC1F6 PBW114-Ae. tauschii 14102 amphiploid/BWL4444 (HD2967+Yr10)
15	IL-21	Introgression lines	BC1F6 PBW114-Ae. tauschii 14102 amphiploid/BWL4444 (HD2967+Yr10)
16	IL-27	Introgression lines	BC1F6 PBW114-Ae. tauschii 14102 amphiploid/BWL3531 (PBW343 Yr17+Yr70+Lr76)
17	IL-29	Introgression lines	BC1F6 PBW114-Ae. tauschii 14102 amphiploid/BWL3531 (PBW343 Yr17+Yr70+Lr76)
18	IL-30	Introgression lines	BC1F6 PBW114-Ae. tauschii 14102 amphiploid/BWL3531 (PBW343 Yr17+Yr70+Lr76)
19	IL-32	Introgression lines	BC1F6 PBW114-Ae. tauschii 14102 amphiploid/BWL3531 (PBW343 Yr17+Yr70+Lr76)
20	IL-35	Introgression lines	BC1F6 PBW114-Ae. tauschii 14102 amphiploid/BWL3531 (PBW343 Yr17+Yr70+Lr76)
21	IL-39	Introgression lines	BC1F6 PBW114-Ae. tauschii 14170 amphiploid/BWL3279 (DBW17+Yr5)
22	IL-40	Introgression lines	BC1F6 PBW114-Ae. tauschii 14170 amphiploid/BWL3279 (DBW17+Yr5)
23	IL-41	Introgression lines	BC1F6 PBW114-Ae. tauschii 14170 amphiploid/BWL3279 (DBW17+Yr5)
24	IL-42	Introgression lines	BC1F6 PBW114-Ae. tauschii 14170 amphiploid/BWL3279 (DBW17+Yr5)
25	IL-44	Introgression lines	BC1F6 PBW114-Ae. tauschii 14170 amphiploid/BWL3279 (DBW17+Yr5)
26	IL-45	Introgression lines	BC1F6 PBW114-Ae. tauschii 14170 amphiploid/BWL3279 (DBW17+Yr5)
27	IL-47	Introgression lines	BC1F6 PBW114-Ae. tauschii 14170 amphiploid/BWL3279 (DBW17+Yr5)
28	IL-50	Introgression lines	BC1F6 PBW114-Ae. tauschii 14170 amphiploid/BWL3279 (DBW17+Yr5)
29	IL-51	Introgression lines	BC1F6 PBW114-Ae. tauschii 14170 amphiploid/BWL3279 (DBW17+Yr5)
30	IL-54	Introgression lines	BC1F6 PBW114-Ae. tauschii 14170 amphiploid/BWL3279 (DBW17+Yr5)
31	IL-56	Introgression lines	BC1F6 PBW114-Ae. tauschii 14170 amphiploid/BWL3279 (DBW17+Yr5)
32	IL-66	Introgression lines	BC1F6 PBW114-Ae. tauschii 14170 amphiploid/BWL3279 (DBW17+Yr5)
33	IL-68	Introgression lines	BC1F6 PBW114-Ae. tauschii 14170 amphiploid/BWL3279 (DBW17+Yr5)
34	IL-77	Introgression lines	BC1F6 PBW114-Ae. tauschii 14170 amphiploid/BWL4444 (HD2967+Yr10)
35	IL-79	Introgression lines	BC1F6 PBW114-Ae. tauschii 14170 amphiploid/BWL4444 (HD2967+Yr10)
36	IL-80	Introgression lines	BC1F6 PBW114-Ae. tauschii 14170 amphiploid/BWL4444 (HD2967+Yr10)
37	IL-87	Introgression lines	BC1F6 PBW114-Ae. tauschii 14170 amphiploid/BWL4444 (HD2967+Yr10)
38	IL-91	Introgression lines	BC1F6 PBW114-Ae. tauschii 14170 amphiploid/BWL4444 (HD2967+Yr10)
39	IL-95	Introgression lines	BC1F6 PBW114-Ae. tauschii 14170 amphiploid/BWL4444 (HD2967+Yr10)
40	IL-98	Introgression lines	BC1F6 PBW114-Ae. tauschii 14170 amphiploid/BWL4444 (HD2967+Yr10)
41	IL-102	Introgression lines	BC1F6 PBW114-Ae. tauschii 14170 amphiploid/BWL3531 (PBW343 Yr17+Yr70+Lr76)
42	IL-103	Introgression lines	BC1F6 PBW114-Ae. tauschii 14170 amphiploid/BWL3531 (PBW343 Yr17+Yr70+Lr76)
43	IL-105	Introgression lines	BC1F6 PBW114-Ae. tauschii 14170 amphiploid/BWL3531 (PBW343 Yr17+Yr70+Lr76)
44	IL-106	Introgression lines	BC1F6 PBW114-Ae. tauschii 14170 amphiploid/BWL3531 (PBW343 Yr17+Yr70+Lr76)
45	IL-115	Introgression lines	BC1F6 PBW114-Ae. tauschii 14128 amphiploid/BWL3279 (DBW17+Yr5)
46	IL-119	Introgression lines	BC1F6 PBW114-Ae. tauschii 14128 amphiploid/BWL3279 (DBW17+Yr5)
47	IL-120	Introgression lines	BC1F6 PBW114-Ae. tauschii 14128 amphiploid/BWL3279 (DBW17+Yr5)
48	IL-123	Introgression lines	BC1F6 PBW114-Ae. tauschii 14128 amphiploid/BWL3279 (DBW17+Yr5)
49	IL-130	Introgression lines	BC1F6 PBW114-Ae. tauschii 14128 amphiploid/BWL3531 (PBW343 Yr17+Yr70+Lr76)
50	IL-131	Introgression lines	BC1F6 PBW114-Ae. tauschii 14128 amphiploid/BWL3531 (PBW343 Yr17+Yr70+Lr76)
51	IL-134	Introgression lines	BC1F6 PBW114-Ae. tauschii 14128 amphiploid/BWL3531 (PBW343 Yr17+Yr70+Lr76)
52	IL-135	Introgression lines	BC1F6 PBW114-Ae. tauschii 14576 amphiploid/BWL3279 (DBW17+Yr5)
53	IL-136	Introgression lines	BC1F6 PBW114-Ae. tauschii 14576 amphiploid/BWL3279 (DBW17+Yr5)
54	IL-159	Introgression lines	BC1F6 PBW114-Ae. tauschii 14576 amphiploid/BWL3279 (DBW17+Yr5)
55	IL-180	Introgression lines	BC1F6 PBW114-Ae. tauschii 14576 amphiploid/BWL3531 (PBW343 Yr17+Yr70+Lr76)
56	IL-184	Introgression lines	BC1F6 PBW114-Ae. tauschii 14576 amphiploid/BWL3531 (PBW343 Yr17+Yr70+Lr76)
57	IL-185	Introgression lines	BC1F6 PBW114-Ae. tauschii 14576 amphiploid/BWL3531 (PBW343 Yr17+Yr70+Lr76)
58	IL-186	Introgression lines	BC1F6 PBW114-Ae. tauschii 14576 amphiploid/BWL3531 (PBW343 Yr17+Yr70+Lr76)
59	IL-212	Introgression lines	BC1F6 PBW114-Ae. tauschii 3761 amphiploid/BWL4444 (HD2967+Yr10)
60	IL-226	Introgression lines	BC1F6 PBW114-Ae. tauschii 3761 amphiploid/BWL4444 (HD2967+Yr10)
61	IL-227	Introgression lines	BC1F6 PBW114-Ae. tauschii 3761 amphiploid/BWL4444 (HD2967+Yr10)
62	IL-248	Introgression lines	BC1F6 PBW114-Ae. tauschii 3761 amphiploid/BWL3531 (PBW343 Yr17+Yr70+Lr76)
63	IL-259	Introgression lines	BC1F7 PBW114*AT14128/BWL3531
64	IL-279	Introgression lines	BC1F6 PBW114*AT14128/BWL4444
65	IL-303	Introgression lines	BC1F7 PBW114*AT14128/BWL3531
66	IL-308	Introgression lines	BC1F7 PBW114*AT14128/BWL3531
67	IL-355	Introgression lines	BC1F7 PBW114*AT14170/BWL3531
68	IL-364	Introgression lines	BC1F7 PBW114*AT14170/BWL3531
