# Supplementary material for: Stress adaptive plasticity from Aegilops tauschii introgression lines improves drought and heat stress tolerance in bread wheat (Triticum aestivum L.)
Source: PeerJ. 2024 Jun 11;12:e17528. doi: 10.7717/peerj.17528 (PMC11177856; doi:10.7717/peerj.17528)
Supplement: Supplemental Information 9 [file peerj-12-17528-s009.xlsx]

## Sheet: Sheet1
Table S3: Analysis of variance (ANOVA; F value) for agronomic traits of 384 genotypes screened during stage-1
Source of variation	df	Spike Length	Spiklet Number	Plant height	Tiller number
trt.adj	381	9.2215***	18.154***	56.0089***	3.7927*
block.adj	9	1.5976	0.559	2.809*	0.5306
Control	1	0.3227	71.982***	0.2915	19.0443**
Augmented	379	5.1434**	11.595***	64.5103***	5.2269**
Control + Contro vs Aug	380	9.2449***	18.013***	56.1555***	3.7525*
Control vs Aug	1	1889.9016***	2860.449***	54.9***	22.4616**
Grand mean of genotypes		11.4411	18.91	95.3736	67.2475
Genotypic Variance		0.5095	0.6587	6.7097	36.4615
Genotypic Coefficient of Variance		6.2389	4.2923	2.716	8.9793
Heritability (Broad Sense) (%)		45.12	63.17	84.62	21.83
Signif. codes: 0.001 ‘***’ 0.01 ‘**’ 0.05 ‘*’ (Tukey test of significance); df: Degrees of freedom
