# Supplementary material for: Stress adaptive plasticity from Aegilops tauschii introgression lines improves drought and heat stress tolerance in bread wheat (Triticum aestivum L.)
Source: PeerJ. 2024 Jun 11;12:e17528. doi: 10.7717/peerj.17528 (PMC11177856; doi:10.7717/peerj.17528)
Supplement: Supplemental Information 10 [file peerj-12-17528-s010.xlsx]

## Sheet: Sheet1
Table S4: Analysis of variance (ANOVA) for seedling vigour under different growing conditions in stage-II
Source of variation	df	T1 (control)			T2 (30˚C)			T3 (35˚C)			T4 (20% PEG)
		MSS	P-value	CV	MSS	P-value	CV	MSS	P-value	CV	MSS	P-value	CV
Replication	2	11.46	0.3	8.47	14.14	0.2	10.79	2.25	0.51	20.8	2.53	0.54	21.38
Genotype	73	174.17	<0.001		128.32	<0.001		166.8	<0.001	-	146.33	<0.001
Residuals	146	9.42	-		8.63	-		3.37	-	-	3.65	-
df: Degrees of freedom; MSS: Mean sum of squere; CV: coefficient of variation
