# Supplementary material for: Stress adaptive plasticity from Aegilops tauschii introgression lines improves drought and heat stress tolerance in bread wheat (Triticum aestivum L.)
Source: PeerJ. 2024 Jun 11;12:e17528. doi: 10.7717/peerj.17528 (PMC11177856; doi:10.7717/peerj.17528)
Supplement: Supplemental Information 11 [file peerj-12-17528-s011.xlsx]

## Sheet: Sheet1
Table S5.: Single and pooled analysis of variance (ANOVA; mean sum of square) for agronomic traits in stage-III under different environments (E1 to E8)
E1 (27th October, 2020)
Source	Df	DTH	SN	SL	PH	TN	Maturity	Yield
Replication	1	0.331	4.0008	0.0132	5.307	78.81	0.2432	1799
Genotype	73	163.98***	10.8286***	6.1317***	246.639***	1858.32***	14.97***	70072***
Residuals	73	3.126	1.3177	1.4867	3.527	130.62	4.4076	1235
Critical Difference (CD%) at 5%		3.5235	2.2878	2.4301	3.7429	22.7777	4.1842	70.0336
Genotypic Variance		80.4272	4.7555	2.3225	121.556	863.849	5.2812	34418.4
Genotypic Coefficient of Variance		8.4513	10.9864	13.5905	11.0703	35.5269	1.4886	20.6272
Heritability (Broad Sense) in %		96.26	78.3	60.97	97.18	86.87	54.51	96.54
Genetic Advance as percentage of mean		17.081	20.0271	21.8611	22.481	68.2101	2.264	41.7497
E2 (25th October, 2021)
Source	Df	DTH	SN	SL	PH	TN	Maturity	Yield
Replication	1	975.68***	3.7845***	0.0152	0.075	1.73	1.5203	40
Genotype	73	144.09***	11.0151***	0.0152***	213.67***	503.78***	12.8975***	82234***
Residuals	73	4.7	0.2773	0.0835	1.63	41.76	2.2874	251
Critical Difference (CD%) at 5%		4.3221	1.0495	0.5759	2.5447	12.8787	3.0142	31.57
Genotypic Variance		69.6916	5.3689	2.1225	106.02	231.01	5.3051	40991.3
Genotypic Coefficient of Variance		7.8857	12.3519	13.2647	10.8042	19.6493	1.5189	25.8992
Heritability (Broad Sense) in %		93.68	95.09	96.21	98.49	84.69	69.87	99.39
Genetic Advance as percentage of mean		15.7226	24.8121	26.803	22.0875	37.2507	2.6154	53.1897
E3 (28th November, 2020)
Source	Df	DTH	SN	SL	PH	TN	Maturity	Yield
Replication	1	3.8919	0.0678	0.0789	1.388	0.03	14.9257*	14
Genotype	73	13.3421***	9.8497***	8.6465***	171.867***	1292.69***	23.835***	73695***
Residuals	73	1.3029	0.0883	0.0555	0.908	42.81	3.0627	369
Critical Difference (CD%) at 5%		2.2749	0.5922	0.4694	1.899	13.0397	3.4878	38.306
Genotypic Variance		6.0196	4.8807	4.2955	85.4794	624.942	10.3862	36662.7
Genotypic Coefficient of Variance		2.652	11.5041	19.3903	9.789	31.5739	2.1638	23.9745
Heritability (Broad Sense) in %		82.21	98.22	98.72	98.95	93.59	77.23	99
Genetic Advance as percentage of mean		4.9533	23.487	39.6889	20.059	62.9229	3.9172	49.1405
E4 (3rd December, 2021)
Source	Df	DTH	SN	SL	PH	TN	Maturity	Yield
Replication	1	87.811***	0.3634	0.1689	1.52	3.89	7.8108*	2
Genotype	73	12.34***	8.0583***	4.6466***	166.482***	703.33***	23.0515***	33401***
Residuals	73	0.29	0.1153	0.0447	0.694	54.08	1.6327	210
Critical Difference (CD%) at 5%		1.0737	0.6766	0.4213	1.6605	14.6568	2.5466	28.8867
Genotypic Variance		6.0248	3.9715	2.301	82.8939	324.623	10.7094	16595.4
Genotypic Coefficient of Variance		2.6937	10.7933	14.9568	10.0611	23.7746	2.751	30.79
Heritability (Broad Sense) in %		95.4	97.18	98.09	99.17	85.72	86.77	98.75
Genetic Advance as percentage of mean		5.42	21.9184	30.516	20.6396	45.3439	5.2789	63.0298
E5 (15th December, 2020)
Source	Df	DTH	SN	SL	PH	TN	Maturity	Yield
Replication	1	0.6757	1.2798	0.0528	14.482	25.14	5.682	885.43
Genotype	73	25.9141***	11.2352***	7.9181***	236.679***	925.65***	34.595***	2686.32***
Residuals	73	2.4017	0.398	0.1845	33.501	67.03	3.915	847.62
Critical Difference (CD%) at 5%		3.0886	1.2573	0.856	11.5354	16.3173	3.9436	58.0241
Genotypic Variance		11.7562	5.4186	3.8668	101.589	429.308	15.3399	919.348
Genotypic Coefficient of Variance		3.9252	12.6773	20.3662	13.2957	34.0611	3.4963	11.654
Heritability (Broad Sense) in %		83.04	93.16	95.45	75.2	86.49	79.67	52.03
Genetic Advance as percentage of mean		7.3683	25.2061	40.9879	23.7515	65.2561	6.4287	17.3168
E6 (25th December, 2021)
Source	Df	DTH	SN	SL	PH	TN	Maturity	Yield
Replication	1	226.277***	0.1471	0.0575	5.488*	10.811	5.682*	15.7
Genotype	73	20.906***	5.931***	3.8893***	129.063***	108.826***	32.338***	1155.24***
Residuals	73	0.318	0.1506	0.035	1.12	35.14	1.039	165.95
Critical Difference (CD%) at 5%		1.4918	0.7734	0.373	2.1094	15.6784	2.0311	25.638
Genotypic Variance		10.294	2.8902	1.9271	63.9714	36.843	15.6498	494.646
Genotypic Coefficient of Variance		3.8995	9.6822	15.1673	11.5503	12.9443	3.8567	11.2749
Heritability (Broad Sense) in %		97	95.05	98.22	98.28	51.18	93.78	74.88
Genetic Advance as percentage of mean		7.9117	19.4452	30.965	23.588	19.0771	7.6936	20.0983
E7 (28th November, 2020)
Source	Df	DTH	SN	SL	PH	TN	Maturity	Yield
Replication	1	132.432***	0.3121	0.7053	0.973	98.93	0.1689	249*
Genotype	73	11.198***	17.7636***	10.7791***	158.827***	1527.4***	17.2056***	23402***
Residuals	73	2.131	0.3674	0.2799	0.722	93.39	4.8265	62.4
Critical Difference (CD%) at 5%		2.9094	1.2079	1.0545	1.6937	19.2602	4.3785	15.7429
Genotypic Variance		4.5333	8.6981	5.2496	79.0526	717.006	6.1896	1166.79
Genotypic Coefficient of Variance		2.3704	14.5681	21.3913	11.0709	36.6774	1.9557	30.7485
Heritability (Broad Sense) in %		68.02	95.95	94.94	99.09	88.48	56.19	99.47
Genetic Advance as percentage of mean		4.0272	29.396	42.9365	22.7027	71.0686	3.0199	63.1731
E8 (3rd December, 2021)
Source	Df	DTH	SN	SL	PH	TN	Maturity	Yield
Replication	1	132.432***	1.701***	0.0751	16.667**	14.297	0.1689	87.8
Genotype	73	10.421***	6.8492***	5.8801***	224.232***	235.466***	12.6095***	14170.7***
Residuals	73	1.72	0.1342	0.1614	2.272	25.681	2.0319	123.7
Critical Difference (CD%) at 5%		2.6139	0.73	0.8007	3.0039	10.0998	2.8409	22.1663
Genotypic Variance		4.3502	3.3575	2.8593	110.98	104.893	5.2888	7023.51
Genotypic Coefficient of Variance		2.3752	10.6896	16.3082	14.3176	15.3823	2.1097	30.6998
Heritability (Broad Sense) in %		71.66	96.16	94.66	97.99	80.33	72.24	98.27
Genetic Advance as percentage of mean		4.1421	21.5933	32.6849	29.1968	28.401	3.694	62.692
Pooled ANOVA (Based on 8 environments)
Source of variation	Df	DTH	SN	SL	PH	TN	Maturity	Yield
Replication	1	841.00***	2.69**	0.28	5	116	2	767
Genotype	73	135.00***	36.90***	27.09***	686.00***	2207.00***	57.00***	59054.00***
Environment	7	11100.00***	166.30***	70.83***	19524.00***	20547.00***	64233.00***	11787497.00***
Genotype*Environment	511	38.00***	6.38***	3.59***	123.00***	707.00***	16.00***	34537.00***
Residuals	591	3	0.37	0.29	6	61	3	407
Genotype.LSD		1.2	0.42	0.37	1.7	5.42	1.2	14.0085
Environment.LSD		0.4	0.14	0.12	0.56	1.78	0.4	4.60596
Signif. codes: 0.001 ‘***’ 0.01 ‘**’ 0.05 ‘*’ (Tukey test of significance); Df: Degrees of freedom; DTH: Days to heading; SN: Spikelete number; SL: Spike length (cm); PH: Plant height (cm); TN: Tiller number; LSD: Least significance difference
