# Supplementary material for: Stress adaptive plasticity from Aegilops tauschii introgression lines improves drought and heat stress tolerance in bread wheat (Triticum aestivum L.)
Source: PeerJ. 2024 Jun 11;12:e17528. doi: 10.7717/peerj.17528 (PMC11177856; doi:10.7717/peerj.17528)
Supplement: Supplemental Information 12 [file peerj-12-17528-s012.xlsx]

## Sheet: Sheet1
Table S6. Effect of different climate covariates on grain yield in the Aegilops tauschii derived introgression lines (ILs)
Enivornments	Yield	Season		Temp during flowering stage			Temp during grain filling stage
	gm/plot	Mean temp	RF (mm)	Mean max temp	Number of days with >30C	Number of days with >35C	Mean max temp	Number of days with >30C	Number of days with >35C
Early	840.571	16.77	108.15	20.5585	2	0	24.782	20.5	3
Timely	608.527	17.221	105.75	26.5	2	0	31.2	32.5	12
Late	228.717	17.8195	98.25	30.2945	10.5	1	33.196	32.5	14.5
Drought	312.155	16.656	105.75	25.3145	2	0	29.6705	26.5	7
