# Supplementary material for: Stress adaptive plasticity from Aegilops tauschii introgression lines improves drought and heat stress tolerance in bread wheat (Triticum aestivum L.)
Source: PeerJ. 2024 Jun 11;12:e17528. doi: 10.7717/peerj.17528 (PMC11177856; doi:10.7717/peerj.17528)
Supplement: Supplemental Information 13 [file peerj-12-17528-s013.xlsx]

## Sheet: Sheet1
Table S7: Ranking of genotypes and environments based on yield performance (OrResp), stability (OrWAASB), PC1 (OrPC1), and combined yield and stability (OrWAASBY)
type	Genotype	Grain yield (gm/plot)	PC1	PC2	PC3	PC4	PC5	PC6	PC7	WAASB	PctResp	PctWAASB	wRes	wWAASB	OrResp	OrWAASB	OrPC1	WAASBY	OrWAASBY
GEN	IL-10	500.25	-0.707067	-0.493583	4.8154	0.565875	0.375671	-1.59424	-0.0927169	1.23714	57.9387	87.5128	65	35	32	3	5	68.2897	17
GEN	IL-11	395.125	1.09247	-8.03422	3.04821	-0.934315	1.76174	-0.715505	0.621097	2.7184	29.5946	70.3521	65	35	55	22	11	43.8597	48
GEN	IL-14	525.325	-7.51974	1.47566	3.12647	0.306507	-1.18408	2.99493	0.0286951	5.11555	64.6995	42.5807	65	35	23	42	49	56.9579	33
GEN	IL-15	477.131	-4.81302	-6.50845	3.50323	2.25911	0.317987	-0.0344644	0.685531	4.72271	51.7054	47.1318	65	35	41	37	32	50.1046	41
GEN	IL-19	411.875	2.58387	-1.19701	-1.9757	-3.25774	2.29113	2.80625	0.623923	2.27463	34.1108	75.4933	65	35	53	18	22	48.5946	44
GEN	IL-21	285.363	8.67797	-7.02493	2.03307	-6.30374	-0.0805487	2.39482	0.14638	7.16009	0	18.8944	65	35	59	57	52	6.61304	59
GEN	IL-27	472.438	9.07229	-1.17455	5.47089	2.71147	-3.1142	-0.0434846	-0.197988	6.46458	50.4398	26.952	65	35	42	55	53	42.2191	50
GEN	IL-29	484.5	11.0458	-6.29501	1.68091	6.85245	-1.97713	-2.17594	-0.171943	8.3851	53.6922	4.70237	65	35	39	58	58	36.5457	54
GEN	IL-30	597.913	6.54872	4.82956	1.39978	5.52144	0.53064	-2.49167	0.0607616	5.35438	84.2708	39.8138	65	35	3	45	44	68.7109	16
GEN	IL-32	515.575	-5.80578	-1.76028	4.93513	2.98989	0.49839	1.95217	0.518145	4.63198	62.0707	48.1829	65	35	27	36	37	57.21	32
GEN	IL-35	532.125	0.657198	-0.982809	2.824	4.91377	0.304954	0.446012	0.185594	1.34482	66.533	86.2653	65	35	20	4	4	73.4393	7
GEN	IL-39	498.369	-5.68486	2.73683	-0.202226	-4.80324	-0.112063	-0.700712	-0.584784	4.21344	57.4315	53.0319	65	35	33	31	36	55.8916	35
GEN	IL-40	446.438	4.13553	5.05064	-3.3053	-5.29188	2.34806	2.78865	0.402604	4.26684	43.4296	52.4132	65	35	44	32	29	46.5739	45
GEN	IL-41	537.675	-1.69671	0.123643	7.76818	1.19378	-2.29344	-3.64634	-0.351086	2.21928	68.0294	76.1345	65	35	14	17	17	70.8662	12
GEN	IL-42	531.362	-3.0136	0.767732	3.35489	3.15174	1.01088	2.34007	0.765506	2.61772	66.3274	71.5186	65	35	21	20	26	68.1443	18
GEN	IL-44	494.725	1.0998	2.80831	1.30302	-1.79121	-0.315182	0.259061	-0.19058	1.50718	56.4491	84.3844	65	35	35	7	12	66.2264	21
GEN	IL-45	513.244	-8.0084	-3.37458	0.198797	-0.112813	-7.42421	2.28381	-0.393364	5.37029	61.4421	39.6295	65	35	28	46	50	53.8077	40
GEN	IL-47	567.175	-1.00894	3.80982	0.154663	2.43034	0.841888	0.400901	0.404797	1.53987	75.9833	84.0057	65	35	10	8	9	78.7911	1
GEN	IL-50	592.6	-6.05942	3.85015	-5.35361	0.739977	-0.281168	-0.389102	-0.471138	5.07052	82.8385	43.1024	65	35	5	40	40	68.9309	15
GEN	IL-51	556.125	-1.70667	2.30911	1.51014	2.79871	0.635541	0.0978368	0.0217194	1.86592	73.0039	80.2282	65	35	11	11	18	75.5324	2
GEN	IL-54	390.95	-1.49866	-12.4727	0.719693	1.34203	-0.1243	0.553679	0.260907	3.51424	28.4689	61.1322	65	35	56	27	15	39.901	52
GEN	IL-56	404.5	6.49934	3.43263	0.731634	-6.44727	0.709642	2.17012	0.229308	5.0272	32.1223	43.6042	65	35	54	39	43	36.141	56
GEN	IL-66	442.844	6.77207	-4.13365	-5.29424	0.224048	-0.0826808	0.160111	-2.00229	5.48984	42.4607	38.2445	65	35	46	48	47	40.985	51
GEN	IL-68	533.337	5.87312	1.83284	-7.23852	0.284142	-1.25612	-3.41378	5.73195	4.82129	66.8599	45.9898	65	35	19	38	38	59.5554	30
GEN	IL-77	589.325	2.01316	8.68355	6.58452	3.26599	0.0790792	0.536122	-0.27726	4.0436	81.9554	54.9995	65	35	6	29	20	72.5209	10
GEN	IL-79	423.35	4.95037	0.476522	4.84748	-3.72398	-1.27008	0.159785	-0.230229	3.92606	37.2047	56.3612	65	35	51	28	33	43.9094	47
GEN	IL-80	446.281	-1.02584	2.41618	3.25191	-6.20372	-0.207553	0.110909	0.105302	1.99422	43.3875	78.7419	65	35	45	14	10	55.7615	36
GEN	IL-87	567.425	1.50083	6.78315	1.90265	1.76929	1.76743	0.185059	0.132032	2.60756	76.0507	71.6362	65	35	9	19	16	74.5056	5
GEN	IL-91	553.325	-5.52802	3.13619	1.52596	-0.583932	-3.51066	0.737832	-0.295796	4.08812	72.249	54.4837	65	35	12	30	35	66.0312	22
GEN	IL-95	510.95	-1.7453	4.34668	-3.20625	-4.31013	0.345502	-1.01208	-0.6201	2.64356	60.8237	71.2192	65	35	29	21	19	64.4621	26
GEN	IL-98	481.356	-0.0113338	-0.301987	0.125672	-0.998259	-0.086344	0.0129712	-0.245207	0.159281	52.8445	100	65	35	40	1	1	69.3489	13
GEN	IL-102	440.913	0.617021	1.40615	5.43404	-3.49614	0.639945	0.638879	-0.312534	1.66971	41.9399	82.5015	65	35	47	9	3	56.1365	34
GEN	IL-103	430.125	4.59171	-4.00136	-5.13036	-3.15067	-0.843621	-2.02372	-0.535937	4.41142	39.0314	50.7382	65	35	50	34	31	43.1287	49
GEN	IL-105	493.938	10.378	0.630184	-2.50285	5.50895	1.44051	4.34441	0.968066	6.91145	56.2367	21.7748	65	35	36	56	57	44.1751	46
GEN	IL-106	517.163	6.66506	-1.15358	-5.61797	3.82432	-0.601135	1.00541	-0.857814	5.16603	62.4987	41.9959	65	35	25	43	46	55.3227	38
GEN	IL-115	528.65	-3.89614	-3.26744	-1.03385	4.41734	1.67436	0.645774	0.224425	3.38026	65.596	62.6844	65	35	22	25	27	64.5769	25
GEN	IL-119	385.054	14.5095	0.157372	-0.0068298	-4.92916	-0.169663	-1.67557	-0.208304	8.791	26.8792	0	65	35	57	59	59	17.4715	58
GEN	IL-120	534.6	1.43415	0.0619795	-2.87604	3.20921	0.929789	-0.0621851	-0.125208	1.494	67.2003	84.537	65	35	18	6	14	73.2681	8
GEN	IL-123	535.075	4.12885	-2.22761	-9.17864	4.31585	-0.827962	0.424391	-0.059432	4.45046	67.3284	50.2859	65	35	17	35	28	61.3635	28
GEN	IL-130	540.862	2.0882	-0.620723	-4.39886	3.04424	1.50597	-0.512103	-4.95601	2.19299	68.8888	76.4391	65	35	13	16	21	71.5314	11
GEN	IL-131	506.25	5.13384	1.01966	-1.42756	-0.20039	-0.770964	-2.45282	-0.524298	3.39597	59.5565	62.5023	65	35	30	26	34	60.5875	29
GEN	IL-134	583.913	-2.70837	5.27706	-2.25771	2.37076	1.02692	1.37363	-0.0660688	3.10633	80.4961	65.8579	65	35	7	24	23	75.3727	4
GEN	IL-135	536.788	0.135821	3.1133	3.87968	1.74225	1.59215	-0.595637	-0.0217002	1.37867	67.7901	85.8732	65	35	15	5	2	74.1192	6
GEN	IL-136	576.862	-4.32061	2.41189	-9.27187	-0.112763	0.294486	-1.21479	-0.349336	4.29483	78.5953	52.0889	65	35	8	33	30	69.318	14
GEN	IL-159	433.4	-2.90667	-2.71942	3.51716	-3.54813	0.917073	-0.188672	0.432756	2.9819	39.9144	67.2994	65	35	49	23	24	49.4992	43
GEN	IL-180	519.5	-0.964068	1.27121	0.833334	0.432125	1.1393	-0.68497	0.0044035	0.96471	63.129	90.669	65	35	24	2	7	72.768	9
GEN	IL-184	501.75	1.41715	1.63981	-4.81651	-1.99417	0.68352	-0.736069	-0.16097	1.97771	58.3432	78.9331	65	35	31	13	13	65.5496	23
GEN	IL-185	470.225	0.87978	3.78621	3.64042	-4.98695	0.056749	-0.954582	-0.0446984	2.14404	49.8433	77.0062	65	35	43	15	6	59.3503	31
GEN	IL-186	592.7	-5.89472	3.96434	-8.03501	0.67114	-5.1463	2.42194	0.798235	5.40492	82.8654	39.2283	65	35	4	47	39	67.5924	19
GEN	IL-212	492.875	-2.90968	0.0504843	-0.313128	-2.04629	0.0677766	-0.0361241	0.26488	1.88952	55.9502	79.9548	65	35	37	12	25	64.3519	27
GEN	IL-226	496.05	-0.986215	-2.94306	3.1533	3.11979	1.34148	0.326178	0.452734	1.83543	56.8063	80.5815	65	35	34	10	8	65.1276	24
GEN	IL-227	535.6	-9.72474	-0.440156	-2.456	-1.61058	-0.872227	-0.926821	-0.597902	6.18051	67.4699	30.243	65	35	16	50	55	54.4405	39
GEN	IL-248	487.094	-6.63219	-1.8609	-5.72415	-3.57044	1.4935	-0.704111	0.151246	5.28429	54.3915	40.6258	65	35	38	44	45	49.5735	42
GEN	IL-259	656.25	-6.80468	9.35556	2.52201	1.29068	-0.24784	-2.8025	-0.416239	6.22915	100	29.6794	65	35	1	52	48	75.3878	3
GEN	IL-279	381.5	-6.28666	-11.4308	1.01335	-2.31482	0.584272	-0.325832	-0.0090773	6.19177	25.9209	30.1125	65	35	58	51	41	27.388	57
GEN	IL-303	439.1	9.66407	1.25399	3.12721	-1.59896	-1.73733	0.613516	-0.0569702	6.4017	41.4513	27.6804	65	35	48	54	54	36.6315	53
GEN	IL-308	516.862	-8.14792	-1.255	-0.347428	-1.32558	1.18214	-1.14596	0.247956	5.11167	62.4179	42.6257	65	35	26	41	51	55.4906	37
GEN	IL-355	423.075	-6.419	-7.9644	-1.54882	-3.37462	1.49921	-1.76528	0.233726	5.75524	37.1305	35.1697	65	35	52	49	42	36.4442	55
GEN	IL-364	604.55	-9.73067	-0.63022	-0.417353	5.75467	2.64911	-0.160158	0.724302	6.25074	86.0605	29.4294	65	35	2	53	56	66.2396	20
ENV	E1	884.855	-26.6169	6.2693	-2.02227	3.63149	7.99175	-5.29347	0.0444631	17.2227	100	7.45162	65	35	1	7	7	67.6081	1
ENV	E2	785.119	-28.0452	7.08641	-2.70372	4.51154	-8.91244	1.99256	-0.626243	18.3627	85.5516	0	65	35	3	8	8	55.6086	3
ENV	E3	808.644	13.9287	29.6026	-5.16732	-3.45225	-0.846124	-1.98908	-0.400102	14.8463	88.9596	22.9836	65	35	2	6	6	65.868	2
ENV	E4	422.288	6.48361	5.55973	20.889	17.7295	-0.0580193	-0.26944	-0.141282	9.12492	32.9898	60.3783	65	35	4	5	3	42.5758	4
ENV	E5	254.169	1.96626	-4.79803	4.75136	-3.3815	-4.5008	-9.36586	-1.80534	3.06284	8.63512	100	65	35	7	1	1	40.6128	5
ENV	E6	194.562	2.63154	-5.20299	3.8763	-4.59077	-2.57538	-4.34828	0.876443	3.46359	0	97.3807	65	35	8	2	2	34.0832	7
ENV	E7	361.373	8.02816	-3.61756	-16.19	13.7608	-1.71567	-3.00473	4.65033	8.69601	24.1653	63.1816	65	35	5	4	5	37.821	6
ENV	E8	280.814	6.90446	-4.43113	-11.9752	9.35279	0.626656	-0.228957	-6.6596	7.26366	12.4949	72.5435	65	35	6	3	4	33.5119	8
